# Supplementary material for: Co-expression network analysis of genes and networks associated with wheat pistillody
Source: PeerJ. 2022 Aug 24;10:e13902. doi: 10.7717/peerj.13902 (PMC9419718; doi:10.7717/peerj.13902)
Supplement: Table S1 [file peerj-10-13902-s001.xlsx]

## Sheet: Table S1
Tissue	Module	GO ID	GO term	Query item	P value	FDR	Gene ID	Hub gene of MEgreen module	Hub gene of MEskyblue2 module	Hub gene of MEturquoise module	Hub gene of MEwhite module	Hub gene of MEyellow module
booting_spike	skyblue2	GO:0010483	pollen tube reception	3	9.6e-05	0.04	TraesCS7D02G160200.1	0	0	0	0	0
booting_spike	skyblue2	GO:0010483	pollen tube reception	3	9.6e-05	0.04	TraesCS7A02G159400.1	0	0	0	0	0
booting_spike	skyblue2	GO:0010483	pollen tube reception	3	9.6e-05	0.04	TraesCS7B02G063800.1	0	0	0	0	0
booting_spike	white	GO:0009865	pollen tube adhesion	3	0.00013	0.048	TraesCS2A02G131400.2	0	0	0	0	0
booting_spike	white	GO:0009865	pollen tube adhesion	3	0.00013	0.048	TraesCS2D02G133500.4	0	0	0	0	0
booting_spike	white	GO:0009865	pollen tube adhesion	3	0.00013	0.048	TraesCS2B02G153800.3	0	0	0	0	0
early_ovary	yellow	GO:0009909	regulation of flower development	180	7.8e-12	9.3e-10	TraesCS6B02G189000.1	0	0	0	0	0
early_ovary	yellow	GO:0009909	regulation of flower development	180	7.8e-12	9.3e-10	TraesCS3D02G265800.1	0	0	0	0	0
early_ovary	yellow	GO:0009909	regulation of flower development	180	7.8e-12	9.3e-10	TraesCS3D02G386400.1	0	0	0	0	0
early_ovary	yellow	GO:0009909	regulation of flower development	180	7.8e-12	9.3e-10	TraesCS4B02G187900.1	0	0	0	0	0
early_ovary	yellow	GO:0009909	regulation of flower development	180	7.8e-12	9.3e-10	TraesCS2B02G282300.1	0	0	0	0	0
early_ovary	yellow	GO:0009909	regulation of flower development	180	7.8e-12	9.3e-10	TraesCS5A02G025500.1	0	0	0	0	0
early_ovary	yellow	GO:0009909	regulation of flower development	180	7.8e-12	9.3e-10	TraesCS3B02G353300.1	0	0	0	0	0
early_ovary	yellow	GO:0009909	regulation of flower development	180	7.8e-12	9.3e-10	TraesCS3D02G261300.1	0	0	0	0	0
early_ovary	yellow	GO:0009909	regulation of flower development	180	7.8e-12	9.3e-10	TraesCS4D02G181400.1	0	0	0	0	0
early_ovary	yellow	GO:0009909	regulation of flower development	180	7.8e-12	9.3e-10	TraesCS5B02G163000.1	0	0	0	0	0
early_ovary	yellow	GO:0009909	regulation of flower development	180	7.8e-12	9.3e-10	TraesCS2D02G350800.1	0	0	0	0	0
early_ovary	yellow	GO:0009909	regulation of flower development	180	7.8e-12	9.3e-10	TraesCS3A02G217600.2	0	0	0	0	0
early_ovary	yellow	GO:0009909	regulation of flower development	180	7.8e-12	9.3e-10	TraesCS5A02G113700.1	0	0	0	0	0
early_ovary	yellow	GO:0009909	regulation of flower development	180	7.8e-12	9.3e-10	TraesCS6A02G205700.1	0	0	0	0	0
early_ovary	yellow	GO:0009909	regulation of flower development	180	7.8e-12	9.3e-10	TraesCS7A02G062100.1	0	0	0	0	0
early_ovary	yellow	GO:0009909	regulation of flower development	180	7.8e-12	9.3e-10	TraesCS6A02G109100.2	0	0	0	0	0
early_ovary	yellow	GO:0009909	regulation of flower development	180	7.8e-12	9.3e-10	TraesCS5B02G251700.1	0	0	0	0	0
early_ovary	yellow	GO:0009909	regulation of flower development	180	7.8e-12	9.3e-10	TraesCS4B02G288200.1	0	0	0	0	0
early_ovary	yellow	GO:0009909	regulation of flower development	180	7.8e-12	9.3e-10	TraesCS5D02G128600.1	0	0	0	0	0
early_ovary	yellow	GO:0009909	regulation of flower development	180	7.8e-12	9.3e-10	TraesCS7B02G190000.2	0	0	0	0	0
early_ovary	yellow	GO:0009909	regulation of flower development	180	7.8e-12	9.3e-10	TraesCS2B02G281400.1	0	0	0	0	0
early_ovary	yellow	GO:0009909	regulation of flower development	180	7.8e-12	9.3e-10	TraesCS6A02G213300.1	0	0	0	0	0
early_ovary	yellow	GO:0009909	regulation of flower development	180	7.8e-12	9.3e-10	TraesCS1B02G123000.1	0	0	0	0	0
early_ovary	yellow	GO:0009909	regulation of flower development	180	7.8e-12	9.3e-10	TraesCS7D02G246600.1	0	0	0	0	0
early_ovary	yellow	GO:0009909	regulation of flower development	180	7.8e-12	9.3e-10	TraesCS6B02G017800.1	0	0	0	0	0
early_ovary	yellow	GO:0009909	regulation of flower development	180	7.8e-12	9.3e-10	TraesCS6B02G348300.1	0	0	0	0	0
early_ovary	yellow	GO:0009909	regulation of flower development	180	7.8e-12	9.3e-10	TraesCS3B02G382000.1	0	0	0	0	0
early_ovary	yellow	GO:0009909	regulation of flower development	180	7.8e-12	9.3e-10	TraesCS6B02G311200.1	0	0	0	0	0
early_ovary	yellow	GO:0009909	regulation of flower development	180	7.8e-12	9.3e-10	TraesCS5D02G071000.1	0	0	0	0	0
early_ovary	yellow	GO:0009909	regulation of flower development	180	7.8e-12	9.3e-10	TraesCS3A02G217500.2	0	0	0	0	0
early_ovary	yellow	GO:0009909	regulation of flower development	180	7.8e-12	9.3e-10	TraesCS7B02G073300.1	0	0	0	0	0
early_ovary	yellow	GO:0009909	regulation of flower development	180	7.8e-12	9.3e-10	TraesCS6A02G259000.2	0	0	0	0	0
early_ovary	yellow	GO:0009909	regulation of flower development	180	7.8e-12	9.3e-10	TraesCS5B02G186000.1	0	0	0	0	0
early_ovary	yellow	GO:0009909	regulation of flower development	180	7.8e-12	9.3e-10	TraesCS4A02G120000.2	0	0	0	0	0
early_ovary	yellow	GO:0009909	regulation of flower development	180	7.8e-12	9.3e-10	TraesCS6B02G249100.1	0	0	0	0	0
early_ovary	yellow	GO:0009909	regulation of flower development	180	7.8e-12	9.3e-10	TraesCS3D02G384700.1	0	0	0	0	0
early_ovary	yellow	GO:0009909	regulation of flower development	180	7.8e-12	9.3e-10	TraesCS2A02G061100.4	0	0	0	0	0
early_ovary	yellow	GO:0009909	regulation of flower development	180	7.8e-12	9.3e-10	TraesCS2B02G174700.1	0	0	0	0	0
early_ovary	yellow	GO:0009909	regulation of flower development	180	7.8e-12	9.3e-10	TraesCS1A02G108900.1	0	0	0	0	0
early_ovary	yellow	GO:0009909	regulation of flower development	180	7.8e-12	9.3e-10	TraesCS1A02G135100.4	0	0	0	0	0
early_ovary	yellow	GO:0009909	regulation of flower development	180	7.8e-12	9.3e-10	TraesCS3A02G059200.2	0	0	0	0	0
early_ovary	yellow	GO:0009909	regulation of flower development	180	7.8e-12	9.3e-10	TraesCS4B02G140900.1	0	0	0	0	0
early_ovary	yellow	GO:0009909	regulation of flower development	180	7.8e-12	9.3e-10	TraesCS1B02G196500.1	0	0	0	0	0
early_ovary	yellow	GO:0009909	regulation of flower development	180	7.8e-12	9.3e-10	TraesCS6D02G302200.1	0	0	0	0	0
early_ovary	yellow	GO:0009909	regulation of flower development	180	7.8e-12	9.3e-10	TraesCS1A02G109300.1	0	0	0	0	0
early_ovary	yellow	GO:0009909	regulation of flower development	180	7.8e-12	9.3e-10	TraesCS5D02G269200.1	0	0	0	0	0
early_ovary	yellow	GO:0009909	regulation of flower development	180	7.8e-12	9.3e-10	TraesCS6A02G204800.1	0	0	0	0	0
early_ovary	yellow	GO:0009909	regulation of flower development	180	7.8e-12	9.3e-10	TraesCS5A02G059500.1	0	0	0	0	0
early_ovary	yellow	GO:0009909	regulation of flower development	180	7.8e-12	9.3e-10	TraesCS2A02G441200.1	0	0	0	0	0
early_ovary	yellow	GO:0009909	regulation of flower development	180	7.8e-12	9.3e-10	TraesCS2A02G060600.1	0	0	0	0	0
early_ovary	yellow	GO:0009909	regulation of flower development	180	7.8e-12	9.3e-10	TraesCS4B02G160100.1	0	0	0	0	0
early_ovary	yellow	GO:0009909	regulation of flower development	180	7.8e-12	9.3e-10	TraesCS1B02G144800.2	0	0	0	0	0
early_ovary	yellow	GO:0009909	regulation of flower development	180	7.8e-12	9.3e-10	TraesCS1D02G213600.1	0	0	0	0	0
early_ovary	yellow	GO:0009909	regulation of flower development	180	7.8e-12	9.3e-10	TraesCS1D02G091000.1	0	0	0	0	0
early_ovary	yellow	GO:0009909	regulation of flower development	180	7.8e-12	9.3e-10	TraesCS4D02G058900.1	0	0	0	0	0
early_ovary	yellow	GO:0009909	regulation of flower development	180	7.8e-12	9.3e-10	TraesCS4D02G098100.1	0	0	0	0	0
early_ovary	yellow	GO:0009909	regulation of flower development	180	7.8e-12	9.3e-10	TraesCS5D02G392100.1	0	0	0	0	0
early_ovary	yellow	GO:0009909	regulation of flower development	180	7.8e-12	9.3e-10	TraesCS2A02G585700.1	0	0	0	0	0
early_ovary	yellow	GO:0009909	regulation of flower development	180	7.8e-12	9.3e-10	TraesCS5D02G057500.1	0	0	0	0	0
early_ovary	yellow	GO:0009909	regulation of flower development	180	7.8e-12	9.3e-10	TraesCS3A02G393400.1	0	0	0	0	0
early_ovary	yellow	GO:0009909	regulation of flower development	180	7.8e-12	9.3e-10	TraesCS1B02G326400.1	0	0	0	0	0
early_ovary	yellow	GO:0009909	regulation of flower development	180	7.8e-12	9.3e-10	TraesCS3D02G191600.1	0	0	0	0	0
early_ovary	yellow	GO:0009909	regulation of flower development	180	7.8e-12	9.3e-10	TraesCS3B02G603400.2	0	0	0	0	0
early_ovary	yellow	GO:0009909	regulation of flower development	180	7.8e-12	9.3e-10	TraesCS4A02G015800.1	0	0	0	0	0
early_ovary	yellow	GO:0009909	regulation of flower development	180	7.8e-12	9.3e-10	TraesCS6A02G237700.1	0	0	0	0	0
early_ovary	yellow	GO:0009909	regulation of flower development	180	7.8e-12	9.3e-10	TraesCS3D02G266300.1	0	0	0	0	0
early_ovary	yellow	GO:0009909	regulation of flower development	180	7.8e-12	9.3e-10	TraesCS2A02G353300.1	0	0	0	0	0
early_ovary	yellow	GO:0009909	regulation of flower development	180	7.8e-12	9.3e-10	TraesCS5B02G387100.1	0	0	0	0	0
early_ovary	yellow	GO:0009909	regulation of flower development	180	7.8e-12	9.3e-10	TraesCS1A02G132400.1	0	0	0	0	0
early_ovary	yellow	GO:0009909	regulation of flower development	180	7.8e-12	9.3e-10	TraesCS3B02G412700.1	0	0	0	0	0
early_ovary	yellow	GO:0009909	regulation of flower development	180	7.8e-12	9.3e-10	TraesCS2A02G060700.1	0	0	0	0	0
early_ovary	yellow	GO:0009909	regulation of flower development	180	7.8e-12	9.3e-10	TraesCS5A02G261900.1	0	0	0	0	0
early_ovary	yellow	GO:0009909	regulation of flower development	180	7.8e-12	9.3e-10	TraesCS7A02G076700.1	0	0	0	0	0
early_ovary	yellow	GO:0009909	regulation of flower development	180	7.8e-12	9.3e-10	TraesCS4A02G375100.1	0	0	0	0	0
early_ovary	yellow	GO:0009909	regulation of flower development	180	7.8e-12	9.3e-10	TraesCS2D02G452000.1	0	0	0	0	0
early_ovary	yellow	GO:0009909	regulation of flower development	180	7.8e-12	9.3e-10	TraesCS4D02G287000.1	0	0	0	0	0
early_ovary	yellow	GO:0009909	regulation of flower development	180	7.8e-12	9.3e-10	TraesCS5A02G197700.1	0	0	0	0	0
early_ovary	yellow	GO:0009909	regulation of flower development	180	7.8e-12	9.3e-10	TraesCS7B02G125000.2	0	0	0	0	0
early_ovary	yellow	GO:0009909	regulation of flower development	180	7.8e-12	9.3e-10	TraesCS1B02G154500.1	0	0	0	0	0
early_ovary	yellow	GO:0009909	regulation of flower development	180	7.8e-12	9.3e-10	TraesCS1D02G218700.1	0	0	0	0	0
early_ovary	yellow	GO:0009909	regulation of flower development	180	7.8e-12	9.3e-10	TraesCS4D02G189300.1	0	0	0	0	0
early_ovary	yellow	GO:0009909	regulation of flower development	180	7.8e-12	9.3e-10	TraesCS3B02G425400.1	0	0	0	0	0
early_ovary	yellow	GO:0009909	regulation of flower development	180	7.8e-12	9.3e-10	TraesCS5D02G032200.1	0	0	0	0	0
early_ovary	yellow	GO:0009909	regulation of flower development	180	7.8e-12	9.3e-10	TraesCS6A02G219600.1	0	0	0	0	0
early_ovary	yellow	GO:0009909	regulation of flower development	180	7.8e-12	9.3e-10	TraesCS6A02G318300.1	0	0	0	0	0
early_ovary	yellow	GO:0009909	regulation of flower development	180	7.8e-12	9.3e-10	TraesCS4D02G232400.1	0	0	0	0	0
early_ovary	yellow	GO:0009909	regulation of flower development	180	7.8e-12	9.3e-10	TraesCS5B02G358500.1	0	0	0	0	0
early_ovary	yellow	GO:0009909	regulation of flower development	180	7.8e-12	9.3e-10	TraesCS1D02G096900.2	0	0	0	0	0
early_ovary	yellow	GO:0009909	regulation of flower development	180	7.8e-12	9.3e-10	TraesCS6A02G311200.1	0	0	0	0	0
early_ovary	yellow	GO:0009909	regulation of flower development	180	7.8e-12	9.3e-10	TraesCS1B02G149700.1	0	0	0	0	0
early_ovary	yellow	GO:0009909	regulation of flower development	180	7.8e-12	9.3e-10	TraesCS4D02G040000.1	0	0	0	0	0
early_ovary	yellow	GO:0009909	regulation of flower development	180	7.8e-12	9.3e-10	TraesCS3B02G183400.1	0	0	0	0	0
early_ovary	yellow	GO:0009909	regulation of flower development	180	7.8e-12	9.3e-10	TraesCS6A02G322400.2	0	0	0	0	0
early_ovary	yellow	GO:0009909	regulation of flower development	180	7.8e-12	9.3e-10	TraesCS1D02G172600.1	0	0	0	0	0
early_ovary	yellow	GO:0009909	regulation of flower development	180	7.8e-12	9.3e-10	TraesCS5B02G119700.1	0	0	0	0	0
early_ovary	yellow	GO:0009909	regulation of flower development	180	7.8e-12	9.3e-10	TraesCS3A02G499900.1	0	0	0	0	0
early_ovary	yellow	GO:0009909	regulation of flower development	180	7.8e-12	9.3e-10	TraesCS3A02G538000.3	0	0	0	0	0
early_ovary	yellow	GO:0009909	regulation of flower development	180	7.8e-12	9.3e-10	TraesCS2A02G149600.1	0	0	0	0	0
early_ovary	yellow	GO:0009909	regulation of flower development	180	7.8e-12	9.3e-10	TraesCS6D02G199000.1	0	0	0	0	0
early_ovary	yellow	GO:0009909	regulation of flower development	180	7.8e-12	9.3e-10	TraesCS4A02G216300.1	0	0	0	0	0
early_ovary	yellow	GO:0009909	regulation of flower development	180	7.8e-12	9.3e-10	TraesCS3D02G196900.1	0	0	0	0	0
early_ovary	yellow	GO:0009909	regulation of flower development	180	7.8e-12	9.3e-10	TraesCS6B02G213100.1	0	0	0	0	0
early_ovary	yellow	GO:0009909	regulation of flower development	180	7.8e-12	9.3e-10	TraesCS5B02G506300.1	0	0	0	0	0
early_ovary	yellow	GO:0009909	regulation of flower development	180	7.8e-12	9.3e-10	TraesCS6D02G240200.3	0	0	0	0	0
early_ovary	yellow	GO:0009909	regulation of flower development	180	7.8e-12	9.3e-10	TraesCS6D02G202600.1	0	0	0	0	0
early_ovary	yellow	GO:0009909	regulation of flower development	180	7.8e-12	9.3e-10	TraesCS1B02G305000.1	0	0	0	0	0
early_ovary	yellow	GO:0009909	regulation of flower development	180	7.8e-12	9.3e-10	TraesCS2A02G233300.1	0	0	0	0	0
early_ovary	yellow	GO:0009909	regulation of flower development	180	7.8e-12	9.3e-10	TraesCS4A02G116300.1	0	0	0	0	0
early_ovary	yellow	GO:0009909	regulation of flower development	180	7.8e-12	9.3e-10	TraesCS2B02G023900.1	0	0	0	0	0
early_ovary	yellow	GO:0009909	regulation of flower development	180	7.8e-12	9.3e-10	TraesCS1D02G187600.1	0	0	0	0	0
early_ovary	yellow	GO:0009909	regulation of flower development	180	7.8e-12	9.3e-10	TraesCS3A02G321500.1	0	0	0	0	0
early_ovary	yellow	GO:0009909	regulation of flower development	180	7.8e-12	9.3e-10	TraesCS3B02G244700.2	0	0	0	0	0
early_ovary	yellow	GO:0009909	regulation of flower development	180	7.8e-12	9.3e-10	TraesCS2D02G038800.2	0	0	0	0	0
early_ovary	yellow	GO:0009909	regulation of flower development	180	7.8e-12	9.3e-10	TraesCS1B02G380800.1	0	0	0	0	0
early_ovary	yellow	GO:0009909	regulation of flower development	180	7.8e-12	9.3e-10	TraesCS2D02G161700.1	0	0	0	0	0
early_ovary	yellow	GO:0009909	regulation of flower development	180	7.8e-12	9.3e-10	TraesCS1A02G188800.1	0	0	0	0	0
early_ovary	yellow	GO:0009909	regulation of flower development	180	7.8e-12	9.3e-10	TraesCS1D02G061600.2	0	0	0	0	0
early_ovary	yellow	GO:0009909	regulation of flower development	180	7.8e-12	9.3e-10	TraesCS6B02G246300.1	0	0	0	0	0
early_ovary	yellow	GO:0009909	regulation of flower development	180	7.8e-12	9.3e-10	TraesCS4B02G042600.1	0	0	0	0	0
early_ovary	yellow	GO:0009909	regulation of flower development	180	7.8e-12	9.3e-10	TraesCS4B02G321500.1	0	0	0	0	0
early_ovary	yellow	GO:0009909	regulation of flower development	180	7.8e-12	9.3e-10	TraesCS6A02G162300.2	0	0	0	0	0
early_ovary	yellow	GO:0009909	regulation of flower development	180	7.8e-12	9.3e-10	TraesCS4D02G023400.1	0	0	0	0	0
early_ovary	yellow	GO:0009909	regulation of flower development	180	7.8e-12	9.3e-10	TraesCS6D02G196000.1	0	0	0	0	0
early_ovary	yellow	GO:0009909	regulation of flower development	180	7.8e-12	9.3e-10	TraesCS4A02G138800.1	0	0	0	0	0
early_ovary	yellow	GO:0009909	regulation of flower development	180	7.8e-12	9.3e-10	TraesCS2B02G074100.2	0	0	0	0	0
early_ovary	yellow	GO:0009909	regulation of flower development	180	7.8e-12	9.3e-10	TraesCS4D02G167200.1	0	0	0	0	0
early_ovary	yellow	GO:0009909	regulation of flower development	180	7.8e-12	9.3e-10	TraesCS2B02G371200.2	0	0	0	0	0
early_ovary	yellow	GO:0009909	regulation of flower development	180	7.8e-12	9.3e-10	TraesCS6D02G171300.1	0	0	0	0	0
early_ovary	yellow	GO:0009909	regulation of flower development	180	7.8e-12	9.3e-10	TraesCS3A02G208200.2	0	0	0	0	0
early_ovary	yellow	GO:0009909	regulation of flower development	180	7.8e-12	9.3e-10	TraesCS5D02G193200.1	0	0	0	0	0
early_ovary	yellow	GO:0009909	regulation of flower development	180	7.8e-12	9.3e-10	TraesCS5A02G165200.1	0	0	0	0	0
early_ovary	yellow	GO:0009909	regulation of flower development	180	7.8e-12	9.3e-10	TraesCS2A02G112900.1	0	0	0	0	0
early_ovary	yellow	GO:0009909	regulation of flower development	180	7.8e-12	9.3e-10	TraesCS5A02G490500.1	0	0	0	0	0
early_ovary	yellow	GO:0009909	regulation of flower development	180	7.8e-12	9.3e-10	TraesCS6B02G225700.1	0	0	0	0	0
early_ovary	yellow	GO:0009909	regulation of flower development	180	7.8e-12	9.3e-10	TraesCS3B02G299500.1	0	0	0	0	0
early_ovary	yellow	GO:0009909	regulation of flower development	180	7.8e-12	9.3e-10	TraesCS4A02G075000.1	0	0	0	0	0
early_ovary	yellow	GO:0009909	regulation of flower development	180	7.8e-12	9.3e-10	TraesCS2B02G074200.1	0	0	0	0	0
early_ovary	yellow	GO:0009909	regulation of flower development	180	7.8e-12	9.3e-10	TraesCS5A02G356000.1	0	0	0	0	0
early_ovary	yellow	GO:0009909	regulation of flower development	180	7.8e-12	9.3e-10	TraesCS7A02G211900.1	0	0	0	0	0
early_ovary	yellow	GO:0009909	regulation of flower development	180	7.8e-12	9.3e-10	TraesCS6B02G353100.2	0	0	0	0	0
early_ovary	yellow	GO:0009909	regulation of flower development	180	7.8e-12	9.3e-10	TraesCS3D02G326300.1	0	0	0	0	0
early_ovary	yellow	GO:0009909	regulation of flower development	180	7.8e-12	9.3e-10	TraesCS6A02G216600.1	0	0	0	0	0
early_ovary	yellow	GO:0009909	regulation of flower development	180	7.8e-12	9.3e-10	TraesCS6D02G190900.1	0	0	0	0	0
early_ovary	yellow	GO:0009909	regulation of flower development	180	7.8e-12	9.3e-10	TraesCS3D02G337700.2	0	0	0	0	0
early_ovary	yellow	GO:0009909	regulation of flower development	180	7.8e-12	9.3e-10	TraesCS3B02G294200.1	0	0	0	0	0
early_ovary	yellow	GO:0009909	regulation of flower development	180	7.8e-12	9.3e-10	TraesCS2B02G473700.1	0	0	0	0	0
early_ovary	yellow	GO:0009909	regulation of flower development	180	7.8e-12	9.3e-10	TraesCS6D02G290500.2	0	0	0	0	0
early_ovary	yellow	GO:0009909	regulation of flower development	180	7.8e-12	9.3e-10	TraesCS6D02G344100.1	0	0	0	0	0
early_ovary	yellow	GO:0009909	regulation of flower development	180	7.8e-12	9.3e-10	TraesCS3D02G392000.1	0	0	0	0	0
early_ovary	yellow	GO:0009909	regulation of flower development	180	7.8e-12	9.3e-10	TraesCS3A02G274700.1	0	0	0	0	0
early_ovary	yellow	GO:0009909	regulation of flower development	180	7.8e-12	9.3e-10	TraesCS1B02G108800.1	0	0	0	0	0
early_ovary	yellow	GO:0009909	regulation of flower development	180	7.8e-12	9.3e-10	TraesCS5A02G179400.2	0	0	0	0	0
early_ovary	yellow	GO:0009909	regulation of flower development	180	7.8e-12	9.3e-10	TraesCS7A02G010800.1	0	0	0	0	0
early_ovary	yellow	GO:0009909	regulation of flower development	180	7.8e-12	9.3e-10	TraesCS4B02G059000.2	0	0	0	0	0
early_ovary	yellow	GO:0009909	regulation of flower development	180	7.8e-12	9.3e-10	TraesCS6B02G295700.1	0	0	0	0	0
early_ovary	yellow	GO:0009909	regulation of flower development	180	7.8e-12	9.3e-10	TraesCS4D02G156000.1	0	0	0	0	0
early_ovary	yellow	GO:0009909	regulation of flower development	180	7.8e-12	9.3e-10	TraesCS6A02G309600.4	0	0	0	0	0
early_ovary	yellow	GO:0009909	regulation of flower development	180	7.8e-12	9.3e-10	TraesCS6D02G289000.3	0	0	0	0	0
early_ovary	yellow	GO:0009909	regulation of flower development	180	7.8e-12	9.3e-10	TraesCS5A02G489000.1	0	0	0	0	0
early_ovary	yellow	GO:0009909	regulation of flower development	180	7.8e-12	9.3e-10	TraesCS5A02G382700.1	0	0	0	0	0
early_ovary	yellow	GO:0009909	regulation of flower development	180	7.8e-12	9.3e-10	TraesCS6B02G235900.1	0	0	0	0	0
early_ovary	yellow	GO:0009909	regulation of flower development	180	7.8e-12	9.3e-10	TraesCS6D02G190000.1	0	0	0	0	0
early_ovary	yellow	GO:0009909	regulation of flower development	180	7.8e-12	9.3e-10	TraesCS3D02G219500.2	0	0	0	0	0
early_ovary	yellow	GO:0009909	regulation of flower development	180	7.8e-12	9.3e-10	TraesCS6B02G243400.1	0	0	0	0	0
early_ovary	yellow	GO:0009909	regulation of flower development	180	7.8e-12	9.3e-10	TraesCS3A02G093100.2	0	0	0	0	0
early_ovary	yellow	GO:0009909	regulation of flower development	180	7.8e-12	9.3e-10	TraesCS3D02G309800.1	0	0	0	0	0
early_ovary	yellow	GO:0009909	regulation of flower development	180	7.8e-12	9.3e-10	TraesCS6B02G262300.1	0	0	0	0	0
early_ovary	yellow	GO:0009909	regulation of flower development	180	7.8e-12	9.3e-10	TraesCS6A02G282800.1	0	0	0	0	0
early_ovary	yellow	GO:0009909	regulation of flower development	180	7.8e-12	9.3e-10	TraesCS6D02G149800.1	0	0	0	0	0
early_ovary	yellow	GO:0009909	regulation of flower development	180	7.8e-12	9.3e-10	TraesCS2A02G040200.2	0	0	0	0	0
early_ovary	yellow	GO:0009909	regulation of flower development	180	7.8e-12	9.3e-10	TraesCS4B02G246900.1	0	0	0	0	0
early_ovary	yellow	GO:0009909	regulation of flower development	180	7.8e-12	9.3e-10	TraesCS3A02G175600.1	0	0	0	0	0
early_ovary	yellow	GO:0009909	regulation of flower development	180	7.8e-12	9.3e-10	TraesCS4D02G091400.3	0	0	0	0	0
early_ovary	yellow	GO:0009909	regulation of flower development	180	7.8e-12	9.3e-10	TraesCS3D02G328400.1	0	0	0	0	0
early_ovary	yellow	GO:0009909	regulation of flower development	180	7.8e-12	9.3e-10	TraesCS1D02G380200.1	0	0	0	0	0
early_ovary	yellow	GO:0009909	regulation of flower development	180	7.8e-12	9.3e-10	TraesCS3A02G266200.1	0	0	0	0	0
early_ovary	yellow	GO:0009909	regulation of flower development	180	7.8e-12	9.3e-10	TraesCS2A02G452200.1	0	0	0	0	0
early_ovary	yellow	GO:0009909	regulation of flower development	180	7.8e-12	9.3e-10	TraesCS7B02G218500.1	0	0	0	0	0
early_ovary	yellow	GO:0009909	regulation of flower development	180	7.8e-12	9.3e-10	TraesCS2D02G059400.1	0	0	0	0	0
early_ovary	yellow	GO:0009909	regulation of flower development	180	7.8e-12	9.3e-10	TraesCS6D02G307700.1	0	0	0	0	0
early_ovary	yellow	GO:0048464	flower calyx development	18	0.00096	0.045	TraesCS5A02G489000.1	0	0	0	0	0
early_ovary	yellow	GO:0048464	flower calyx development	18	0.00096	0.045	TraesCS5A02G118700.1	0	0	0	0	0
early_ovary	yellow	GO:0048464	flower calyx development	18	0.00096	0.045	TraesCS1A02G135100.4	0	0	0	0	0
early_ovary	yellow	GO:0048464	flower calyx development	18	0.00096	0.045	TraesCS2D02G516300.1	0	0	0	0	0
early_ovary	yellow	GO:0048464	flower calyx development	18	0.00096	0.045	TraesCS2A02G149600.1	0	0	0	0	0
early_ovary	yellow	GO:0048464	flower calyx development	18	0.00096	0.045	TraesCS6A02G158600.1	0	0	0	0	0
early_ovary	yellow	GO:0048464	flower calyx development	18	0.00096	0.045	TraesCS6A02G168100.2	0	0	0	0	0
early_ovary	yellow	GO:0048464	flower calyx development	18	0.00096	0.045	TraesCS2A02G514800.1	0	0	0	0	0
early_ovary	yellow	GO:0048464	flower calyx development	18	0.00096	0.045	TraesCS7D02G307700.1	0	0	0	0	0
early_ovary	yellow	GO:0048464	flower calyx development	18	0.00096	0.045	TraesCS7D02G436800.1	0	0	0	0	0
early_ovary	yellow	GO:0048464	flower calyx development	18	0.00096	0.045	TraesCS1B02G149700.1	0	0	0	0	0
early_ovary	yellow	GO:0048464	flower calyx development	18	0.00096	0.045	TraesCS5B02G251700.1	0	0	0	0	0
early_ovary	yellow	GO:0048464	flower calyx development	18	0.00096	0.045	TraesCS6B02G192700.1	0	0	0	0	0
early_ovary	yellow	GO:0048464	flower calyx development	18	0.00096	0.045	TraesCS7A02G446900.1	0	0	0	0	0
early_ovary	yellow	GO:0048464	flower calyx development	18	0.00096	0.045	TraesCS6D02G156900.2	0	0	0	0	0
early_ovary	yellow	GO:0048464	flower calyx development	18	0.00096	0.045	TraesCS6D02G153900.1	0	0	0	0	0
early_ovary	yellow	GO:0048464	flower calyx development	18	0.00096	0.045	TraesCS7B02G346700.1	0	0	0	0	0
early_ovary	yellow	GO:0048464	flower calyx development	18	0.00096	0.045	TraesCS2B02G174700.1	0	0	0	0	0
early_ovary	yellow	GO:0048573	photoperiodism, flowering	53	0.00097	0.046	TraesCS6B02G189000.1	0	0	0	0	0
early_ovary	yellow	GO:0048573	photoperiodism, flowering	53	0.00097	0.046	TraesCS3A02G208200.2	0	0	0	0	0
early_ovary	yellow	GO:0048573	photoperiodism, flowering	53	0.00097	0.046	TraesCS3D02G363100.1	0	0	0	0	0
early_ovary	yellow	GO:0048573	photoperiodism, flowering	53	0.00097	0.046	TraesCS6B02G382600.1	0	0	0	0	0
early_ovary	yellow	GO:0048573	photoperiodism, flowering	53	0.00097	0.046	TraesCS5B02G358500.1	0	0	0	0	0
early_ovary	yellow	GO:0048573	photoperiodism, flowering	53	0.00097	0.046	TraesCS5B02G072100.1	0	0	0	0	0
early_ovary	yellow	GO:0048573	photoperiodism, flowering	53	0.00097	0.046	TraesCS3B02G127800.1	0	0	0	0	0
early_ovary	yellow	GO:0048573	photoperiodism, flowering	53	0.00097	0.046	TraesCS6D02G332000.1	0	0	0	0	0
early_ovary	yellow	GO:0048573	photoperiodism, flowering	53	0.00097	0.046	TraesCS2B02G180900.1	0	0	0	0	0
early_ovary	yellow	GO:0048573	photoperiodism, flowering	53	0.00097	0.046	TraesCS5A02G356000.1	0	0	0	0	0
early_ovary	yellow	GO:0048573	photoperiodism, flowering	53	0.00097	0.046	TraesCS2D02G289700.2	0	0	0	0	0
early_ovary	yellow	GO:0048573	photoperiodism, flowering	53	0.00097	0.046	TraesCS1B02G349200.1	0	0	0	0	0
early_ovary	yellow	GO:0048573	photoperiodism, flowering	53	0.00097	0.046	TraesCS6B02G300700.1	0	0	0	0	0
early_ovary	yellow	GO:0048573	photoperiodism, flowering	53	0.00097	0.046	TraesCS3D02G323700.1	0	0	0	0	0
early_ovary	yellow	GO:0048573	photoperiodism, flowering	53	0.00097	0.046	TraesCS5A02G109400.1	0	0	0	0	0
early_ovary	yellow	GO:0048573	photoperiodism, flowering	53	0.00097	0.046	TraesCS5A02G241800.3	0	0	0	0	0
early_ovary	yellow	GO:0048573	photoperiodism, flowering	53	0.00097	0.046	TraesCS6A02G124200.1	0	0	0	0	0
early_ovary	yellow	GO:0048573	photoperiodism, flowering	53	0.00097	0.046	TraesCS1B02G144800.2	0	0	0	0	0
early_ovary	yellow	GO:0048573	photoperiodism, flowering	53	0.00097	0.046	TraesCS7B02G219000.2	0	0	0	0	0
early_ovary	yellow	GO:0048573	photoperiodism, flowering	53	0.00097	0.046	TraesCS5D02G248300.2	0	0	0	0	0
early_ovary	yellow	GO:0048573	photoperiodism, flowering	53	0.00097	0.046	TraesCS5B02G297000.2	0	0	0	0	0
early_ovary	yellow	GO:0048573	photoperiodism, flowering	53	0.00097	0.046	TraesCS3B02G517100.1	0	0	0	0	0
early_ovary	yellow	GO:0048573	photoperiodism, flowering	53	0.00097	0.046	TraesCS2A02G226300.1	0	0	0	0	0
early_ovary	yellow	GO:0048573	photoperiodism, flowering	53	0.00097	0.046	TraesCS6B02G090200.1	0	0	0	0	0
early_ovary	yellow	GO:0048573	photoperiodism, flowering	53	0.00097	0.046	TraesCS6D02G319500.2	0	0	0	0	0
early_ovary	yellow	GO:0048573	photoperiodism, flowering	53	0.00097	0.046	TraesCS2A02G061500.1	0	0	0	0	0
early_ovary	yellow	GO:0048573	photoperiodism, flowering	53	0.00097	0.046	TraesCS6A02G241300.1	0	0	0	0	0
early_ovary	yellow	GO:0048573	photoperiodism, flowering	53	0.00097	0.046	TraesCS1A02G365700.1	0	0	0	0	0
early_ovary	yellow	GO:0048573	photoperiodism, flowering	53	0.00097	0.046	TraesCS5D02G124200.2	0	0	0	0	0
early_ovary	yellow	GO:0048573	photoperiodism, flowering	53	0.00097	0.046	TraesCS1A02G108900.1	0	0	0	0	0
early_ovary	yellow	GO:0048573	photoperiodism, flowering	53	0.00097	0.046	TraesCS1B02G164300.2	0	0	0	0	0
early_ovary	yellow	GO:0048573	photoperiodism, flowering	53	0.00097	0.046	TraesCS7B02G346100.1	0	0	0	0	0
early_ovary	yellow	GO:0048573	photoperiodism, flowering	53	0.00097	0.046	TraesCS3D02G435700.1	0	0	0	0	0
early_ovary	yellow	GO:0048573	photoperiodism, flowering	53	0.00097	0.046	TraesCS5A02G400900.1	0	0	0	0	0
early_ovary	yellow	GO:0048573	photoperiodism, flowering	53	0.00097	0.046	TraesCS1D02G111000.3	0	0	0	0	0
early_ovary	yellow	GO:0048573	photoperiodism, flowering	53	0.00097	0.046	TraesCS6B02G369700.1	0	0	0	0	0
early_ovary	yellow	GO:0048573	photoperiodism, flowering	53	0.00097	0.046	TraesCS3A02G424900.1	0	0	0	0	0
early_ovary	yellow	GO:0048573	photoperiodism, flowering	53	0.00097	0.046	TraesCS6B02G283300.2	0	0	0	0	0
early_ovary	yellow	GO:0048573	photoperiodism, flowering	53	0.00097	0.046	TraesCS3B02G402100.1	0	0	0	0	0
early_ovary	yellow	GO:0048573	photoperiodism, flowering	53	0.00097	0.046	TraesCS6D02G149800.1	0	0	0	0	0
early_ovary	yellow	GO:0048573	photoperiodism, flowering	53	0.00097	0.046	TraesCS6A02G069400.2	0	0	0	0	0
early_ovary	yellow	GO:0048573	photoperiodism, flowering	53	0.00097	0.046	TraesCS7A02G076700.1	0	0	0	0	0
early_ovary	yellow	GO:0048573	photoperiodism, flowering	53	0.00097	0.046	TraesCS6B02G221400.2	0	0	0	0	0
early_ovary	yellow	GO:0048573	photoperiodism, flowering	53	0.00097	0.046	TraesCS5A02G065300.1	0	0	0	0	0
early_ovary	yellow	GO:0048573	photoperiodism, flowering	53	0.00097	0.046	TraesCS6A02G162300.2	0	0	0	0	0
early_ovary	yellow	GO:0048573	photoperiodism, flowering	53	0.00097	0.046	TraesCS4A02G375100.1	0	0	0	0	0
early_ovary	yellow	GO:0048573	photoperiodism, flowering	53	0.00097	0.046	TraesCS5D02G076100.1	0	0	0	0	0
early_ovary	yellow	GO:0048573	photoperiodism, flowering	53	0.00097	0.046	TraesCS6D02G147500.1	0	0	0	0	0
early_ovary	yellow	GO:0048573	photoperiodism, flowering	53	0.00097	0.046	TraesCS2D02G231800.1	0	0	0	0	0
early_ovary	yellow	GO:0048573	photoperiodism, flowering	53	0.00097	0.046	TraesCS4A02G138800.1	0	0	0	0	0
early_ovary	yellow	GO:0048573	photoperiodism, flowering	53	0.00097	0.046	TraesCS4D02G167200.1	0	0	0	0	0
early_ovary	yellow	GO:0048573	photoperiodism, flowering	53	0.00097	0.046	TraesCS3A02G330200.1	0	0	0	0	0
early_ovary	yellow	GO:0048573	photoperiodism, flowering	53	0.00097	0.046	TraesCS1D02G218700.1	0	0	0	0	0
pistillody-stamen	turquoise	GO:0048440	carpel development	198	3.8e-05	0.0046	TraesCS1B02G273300.1	0	0	0	0	0
pistillody-stamen	turquoise	GO:0048440	carpel development	198	3.8e-05	0.0046	TraesCS1A02G301800.2	0	0	0	0	0
pistillody-stamen	turquoise	GO:0048440	carpel development	198	3.8e-05	0.0046	TraesCS1B02G377100.1	0	0	0	0	0
pistillody-stamen	turquoise	GO:0048440	carpel development	198	3.8e-05	0.0046	TraesCS5A02G370200.1	0	0	0	0	0
pistillody-stamen	turquoise	GO:0048440	carpel development	198	3.8e-05	0.0046	TraesCS7D02G363200.1	0	0	0	0	0
pistillody-stamen	turquoise	GO:0048440	carpel development	198	3.8e-05	0.0046	TraesCS2B02G138400.1	0	0	0	0	0
pistillody-stamen	turquoise	GO:0048440	carpel development	198	3.8e-05	0.0046	TraesCS5B02G563900.2	0	0	1	0	0
pistillody-stamen	turquoise	GO:0048440	carpel development	198	3.8e-05	0.0046	TraesCS2A02G344300.1	0	0	0	0	0
pistillody-stamen	turquoise	GO:0048440	carpel development	198	3.8e-05	0.0046	TraesCS7D02G263400.1	0	0	0	0	0
pistillody-stamen	turquoise	GO:0048440	carpel development	198	3.8e-05	0.0046	TraesCS2B02G258400.2	0	0	0	0	0
pistillody-stamen	turquoise	GO:0048440	carpel development	198	3.8e-05	0.0046	TraesCS5A02G402800.1	0	0	0	0	0
pistillody-stamen	turquoise	GO:0048440	carpel development	198	3.8e-05	0.0046	TraesCS3B02G607600.1	0	0	0	0	0
pistillody-stamen	turquoise	GO:0048440	carpel development	198	3.8e-05	0.0046	TraesCS7D02G244000.1	0	0	1	0	0
pistillody-stamen	turquoise	GO:0048440	carpel development	198	3.8e-05	0.0046	TraesCS2A02G104100.1	0	0	0	0	0
pistillody-stamen	turquoise	GO:0048440	carpel development	198	3.8e-05	0.0046	TraesCS3D02G497300.1	0	0	0	0	0
pistillody-stamen	turquoise	GO:0048440	carpel development	198	3.8e-05	0.0046	TraesCS7A02G308400.1	0	0	1	0	0
pistillody-stamen	turquoise	GO:0048440	carpel development	198	3.8e-05	0.0046	TraesCS5B02G319600.1	0	0	0	0	0
pistillody-stamen	turquoise	GO:0048440	carpel development	198	3.8e-05	0.0046	TraesCS6B02G181300.1	0	0	0	0	0
pistillody-stamen	turquoise	GO:0048440	carpel development	198	3.8e-05	0.0046	TraesCS3B02G374400.1	0	0	0	0	0
pistillody-stamen	turquoise	GO:0048440	carpel development	198	3.8e-05	0.0046	TraesCS5A02G263600.1	0	0	0	0	0
pistillody-stamen	turquoise	GO:0048440	carpel development	198	3.8e-05	0.0046	TraesCS1A02G444500.1	0	0	0	0	0
pistillody-stamen	turquoise	GO:0048440	carpel development	198	3.8e-05	0.0046	TraesCS2D02G523100.2	0	0	0	0	0
pistillody-stamen	turquoise	GO:0048440	carpel development	198	3.8e-05	0.0046	TraesCS2A02G232400.1	0	0	0	0	0
pistillody-stamen	turquoise	GO:0048440	carpel development	198	3.8e-05	0.0046	TraesCS1B02G473400.1	0	0	0	0	0
pistillody-stamen	turquoise	GO:0048440	carpel development	198	3.8e-05	0.0046	TraesCS6D02G278700.1	0	0	0	0	0
pistillody-stamen	turquoise	GO:0048440	carpel development	198	3.8e-05	0.0046	TraesCS5B02G115100.1	0	0	0	0	0
pistillody-stamen	turquoise	GO:0048440	carpel development	198	3.8e-05	0.0046	TraesCS7A02G293300.3	0	0	0	0	0
pistillody-stamen	turquoise	GO:0048440	carpel development	198	3.8e-05	0.0046	TraesCS2D02G199900.1	0	0	1	0	0
pistillody-stamen	turquoise	GO:0048440	carpel development	198	3.8e-05	0.0046	TraesCS7B02G324500.1	0	0	0	0	0
pistillody-stamen	turquoise	GO:0048440	carpel development	198	3.8e-05	0.0046	TraesCS7D02G416400.1	0	0	1	0	0
pistillody-stamen	turquoise	GO:0048440	carpel development	198	3.8e-05	0.0046	TraesCS7D02G284100.1	0	0	0	0	0
pistillody-stamen	turquoise	GO:0048440	carpel development	198	3.8e-05	0.0046	TraesCS4A02G133800.1	0	0	0	0	0
pistillody-stamen	turquoise	GO:0048440	carpel development	198	3.8e-05	0.0046	TraesCS3D02G219500.1	0	0	0	0	0
pistillody-stamen	turquoise	GO:0048440	carpel development	198	3.8e-05	0.0046	TraesCS2D02G418800.1	0	0	0	0	0
pistillody-stamen	turquoise	GO:0048440	carpel development	198	3.8e-05	0.0046	TraesCS1A02G236900.2	0	0	0	0	0
pistillody-stamen	turquoise	GO:0048440	carpel development	198	3.8e-05	0.0046	TraesCS3D02G336200.1	0	0	0	0	0
pistillody-stamen	turquoise	GO:0048440	carpel development	198	3.8e-05	0.0046	TraesCS4A02G016600.1	0	0	1	0	0
pistillody-stamen	turquoise	GO:0048440	carpel development	198	3.8e-05	0.0046	TraesCS6A02G259000.1	0	0	0	0	0
pistillody-stamen	turquoise	GO:0048440	carpel development	198	3.8e-05	0.0046	TraesCS1D02G365100.1	0	0	0	0	0
pistillody-stamen	turquoise	GO:0048440	carpel development	198	3.8e-05	0.0046	TraesCS3D02G442000.1	0	0	0	0	0
pistillody-stamen	turquoise	GO:0048440	carpel development	198	3.8e-05	0.0046	TraesCS7D02G271400.1	0	0	0	0	0
pistillody-stamen	turquoise	GO:0048440	carpel development	198	3.8e-05	0.0046	TraesCS5D02G325400.2	0	0	0	0	0
pistillody-stamen	turquoise	GO:0048440	carpel development	198	3.8e-05	0.0046	TraesCS1A02G225100.1	0	0	0	0	0
pistillody-stamen	turquoise	GO:0048440	carpel development	198	3.8e-05	0.0046	TraesCS3D02G357400.1	0	0	0	0	0
pistillody-stamen	turquoise	GO:0048440	carpel development	198	3.8e-05	0.0046	TraesCS2B02G154100.1	0	0	0	0	0
pistillody-stamen	turquoise	GO:0048440	carpel development	198	3.8e-05	0.0046	TraesCS2A02G422400.1	0	0	0	0	0
pistillody-stamen	turquoise	GO:0048440	carpel development	198	3.8e-05	0.0046	TraesCS4D02G233200.1	0	0	0	0	0
pistillody-stamen	turquoise	GO:0048440	carpel development	198	3.8e-05	0.0046	TraesCS5D02G294500.1	0	0	0	0	0
pistillody-stamen	turquoise	GO:0048440	carpel development	198	3.8e-05	0.0046	TraesCS5D02G550700.1	0	0	1	0	0
pistillody-stamen	turquoise	GO:0048440	carpel development	198	3.8e-05	0.0046	TraesCS7A02G270900.1	0	0	0	0	0
pistillody-stamen	turquoise	GO:0048440	carpel development	198	3.8e-05	0.0046	TraesCS3A02G441700.1	0	0	1	0	0
pistillody-stamen	turquoise	GO:0048440	carpel development	198	3.8e-05	0.0046	TraesCS5A02G390300.2	0	0	0	0	0
pistillody-stamen	turquoise	GO:0048440	carpel development	198	3.8e-05	0.0046	TraesCS4B02G064000.1	0	0	0	0	0
pistillody-stamen	turquoise	GO:0048440	carpel development	198	3.8e-05	0.0046	TraesCS7B02G437100.1	0	0	0	0	0
pistillody-stamen	turquoise	GO:0048440	carpel development	198	3.8e-05	0.0046	TraesCS3A02G536300.1	0	0	0	0	0
pistillody-stamen	turquoise	GO:0048440	carpel development	198	3.8e-05	0.0046	TraesCS1D02G346800.1	0	0	0	0	0
pistillody-stamen	turquoise	GO:0048440	carpel development	198	3.8e-05	0.0046	TraesCS3D02G146900.1	0	0	0	0	0
pistillody-stamen	turquoise	GO:0048440	carpel development	198	3.8e-05	0.0046	TraesCS6B02G286400.2	0	0	0	0	0
pistillody-stamen	turquoise	GO:0048440	carpel development	198	3.8e-05	0.0046	TraesCS1A02G227300.1	0	0	0	0	0
pistillody-stamen	turquoise	GO:0048440	carpel development	198	3.8e-05	0.0046	TraesCS7B02G303300.1	0	0	0	0	0
pistillody-stamen	turquoise	GO:0048440	carpel development	198	3.8e-05	0.0046	TraesCS3D02G434700.1	0	0	0	0	0
pistillody-stamen	turquoise	GO:0048440	carpel development	198	3.8e-05	0.0046	TraesCS2B02G550700.1	0	0	0	0	0
pistillody-stamen	turquoise	GO:0048440	carpel development	198	3.8e-05	0.0046	TraesCS6D02G248300.1	0	0	0	0	0
pistillody-stamen	turquoise	GO:0048440	carpel development	198	3.8e-05	0.0046	TraesCS1B02G479300.1	0	0	1	0	0
pistillody-stamen	turquoise	GO:0048440	carpel development	198	3.8e-05	0.0046	TraesCS4D02G186200.1	0	0	0	0	0
pistillody-stamen	turquoise	GO:0048440	carpel development	198	3.8e-05	0.0046	TraesCS2A02G243300.4	0	0	0	0	0
pistillody-stamen	turquoise	GO:0048440	carpel development	198	3.8e-05	0.0046	TraesCS1B02G144800.3	0	0	0	0	0
pistillody-stamen	turquoise	GO:0048440	carpel development	198	3.8e-05	0.0046	TraesCS5B02G286100.2	0	0	0	0	0
pistillody-stamen	turquoise	GO:0048440	carpel development	198	3.8e-05	0.0046	TraesCS3A02G363900.1	0	0	0	0	0
pistillody-stamen	turquoise	GO:0048440	carpel development	198	3.8e-05	0.0046	TraesCS5B02G454200.1	0	0	0	0	0
pistillody-stamen	turquoise	GO:0048440	carpel development	198	3.8e-05	0.0046	TraesCS3D02G091000.2	0	0	0	0	0
pistillody-stamen	turquoise	GO:0048440	carpel development	198	3.8e-05	0.0046	TraesCS6A02G158100.1	0	0	0	0	0
pistillody-stamen	turquoise	GO:0048440	carpel development	198	3.8e-05	0.0046	TraesCS2B02G219300.1	0	0	1	0	0
pistillody-stamen	turquoise	GO:0048440	carpel development	198	3.8e-05	0.0046	TraesCS4A02G119800.1	0	0	1	0	0
pistillody-stamen	turquoise	GO:0048440	carpel development	198	3.8e-05	0.0046	TraesCS4B02G234600.1	0	0	0	0	0
pistillody-stamen	turquoise	GO:0048440	carpel development	198	3.8e-05	0.0046	TraesCS3D02G191600.4	0	0	1	0	0
pistillody-stamen	turquoise	GO:0048440	carpel development	198	3.8e-05	0.0046	TraesCS1A02G072200.1	0	0	0	0	0
pistillody-stamen	turquoise	GO:0048440	carpel development	198	3.8e-05	0.0046	TraesCS2A02G346000.1	0	0	0	0	0
pistillody-stamen	turquoise	GO:0048440	carpel development	198	3.8e-05	0.0046	TraesCS7B02G169200.1	0	0	0	0	0
pistillody-stamen	turquoise	GO:0048440	carpel development	198	3.8e-05	0.0046	TraesCS3D02G156100.1	0	0	0	0	0
pistillody-stamen	turquoise	GO:0048440	carpel development	198	3.8e-05	0.0046	TraesCS3B02G248200.1	0	0	1	0	0
pistillody-stamen	turquoise	GO:0048440	carpel development	198	3.8e-05	0.0046	TraesCS3B02G157500.1	0	0	0	0	0
pistillody-stamen	turquoise	GO:0048440	carpel development	198	3.8e-05	0.0046	TraesCS3B02G543300.1	0	0	1	0	0
pistillody-stamen	turquoise	GO:0048440	carpel development	198	3.8e-05	0.0046	TraesCS4D02G101500.1	0	0	0	0	0
pistillody-stamen	turquoise	GO:0048440	carpel development	198	3.8e-05	0.0046	TraesCS2D02G103800.1	0	0	0	0	0
pistillody-stamen	turquoise	GO:0048440	carpel development	198	3.8e-05	0.0046	TraesCS5B02G032000.1	0	0	0	0	0
pistillody-stamen	turquoise	GO:0048440	carpel development	198	3.8e-05	0.0046	TraesCS3B02G475600.1	0	0	1	0	0
pistillody-stamen	turquoise	GO:0048440	carpel development	198	3.8e-05	0.0046	TraesCS4A02G265100.1	0	0	1	0	0
pistillody-stamen	turquoise	GO:0048440	carpel development	198	3.8e-05	0.0046	TraesCS1D02G004900.1	0	0	0	0	0
pistillody-stamen	turquoise	GO:0048440	carpel development	198	3.8e-05	0.0046	TraesCS4B02G287600.1	0	0	0	0	0
pistillody-stamen	turquoise	GO:0048440	carpel development	198	3.8e-05	0.0046	TraesCS4D02G235800.1	0	0	1	0	0
pistillody-stamen	turquoise	GO:0048440	carpel development	198	3.8e-05	0.0046	TraesCS3B02G164500.1	0	0	1	0	0
pistillody-stamen	turquoise	GO:0048440	carpel development	198	3.8e-05	0.0046	TraesCS2A02G268300.1	0	0	0	0	0
pistillody-stamen	turquoise	GO:0048440	carpel development	198	3.8e-05	0.0046	TraesCS7A02G245400.1	0	0	0	0	0
pistillody-stamen	turquoise	GO:0048440	carpel development	198	3.8e-05	0.0046	TraesCS3A02G449300.2	0	0	0	0	0
pistillody-stamen	turquoise	GO:0048440	carpel development	198	3.8e-05	0.0046	TraesCS3A02G148400.1	0	0	0	0	0
pistillody-stamen	turquoise	GO:0048440	carpel development	198	3.8e-05	0.0046	TraesCS2B02G191500.1	0	0	0	0	0
pistillody-stamen	turquoise	GO:0048440	carpel development	198	3.8e-05	0.0046	TraesCS2A02G338200.1	0	0	0	0	0
pistillody-stamen	turquoise	GO:0048440	carpel development	198	3.8e-05	0.0046	TraesCS7D02G338800.1	0	0	0	0	0
pistillody-stamen	turquoise	GO:0048440	carpel development	198	3.8e-05	0.0046	TraesCS3A02G495400.1	0	0	1	0	0
pistillody-stamen	turquoise	GO:0048440	carpel development	198	3.8e-05	0.0046	TraesCS1A02G002700.1	0	0	0	0	0
pistillody-stamen	turquoise	GO:0048440	carpel development	198	3.8e-05	0.0046	TraesCS2B02G497500.1	0	0	1	0	0
pistillody-stamen	turquoise	GO:0048440	carpel development	198	3.8e-05	0.0046	TraesCS7D02G400000.1	0	0	0	0	0
pistillody-stamen	turquoise	GO:0048440	carpel development	198	3.8e-05	0.0046	TraesCS5B02G457300.1	0	0	0	0	0
pistillody-stamen	turquoise	GO:0048440	carpel development	198	3.8e-05	0.0046	TraesCS5A02G245800.1	0	0	0	0	0
pistillody-stamen	turquoise	GO:0048440	carpel development	198	3.8e-05	0.0046	TraesCS3B02G040200.1	0	0	0	0	0
pistillody-stamen	turquoise	GO:0048440	carpel development	198	3.8e-05	0.0046	TraesCS7D02G305200.2	0	0	1	0	0
pistillody-stamen	turquoise	GO:0048440	carpel development	198	3.8e-05	0.0046	TraesCS3D02G234500.1	0	0	0	0	0
pistillody-stamen	turquoise	GO:0048440	carpel development	198	3.8e-05	0.0046	TraesCS7D02G068400.1	0	0	0	0	0
pistillody-stamen	turquoise	GO:0048440	carpel development	198	3.8e-05	0.0046	TraesCS4A02G058800.1	0	0	0	0	0
pistillody-stamen	turquoise	GO:0048440	carpel development	198	3.8e-05	0.0046	TraesCS2A02G521400.2	0	0	0	0	0
pistillody-stamen	turquoise	GO:0048440	carpel development	198	3.8e-05	0.0046	TraesCS6D02G240200.2	0	0	0	0	0
pistillody-stamen	turquoise	GO:0048440	carpel development	198	3.8e-05	0.0046	TraesCS2D02G232800.1	0	0	0	0	0
pistillody-stamen	turquoise	GO:0048440	carpel development	198	3.8e-05	0.0046	TraesCS3D02G434500.1	0	0	0	0	0
pistillody-stamen	turquoise	GO:0048440	carpel development	198	3.8e-05	0.0046	TraesCS2B02G415500.1	0	0	1	0	0
pistillody-stamen	turquoise	GO:0048440	carpel development	198	3.8e-05	0.0046	TraesCS1A02G360700.2	0	0	0	0	0
pistillody-stamen	turquoise	GO:0048440	carpel development	198	3.8e-05	0.0046	TraesCS5D02G400100.2	0	0	0	0	0
pistillody-stamen	turquoise	GO:0048440	carpel development	198	3.8e-05	0.0046	TraesCS2D02G172500.1	0	0	0	0	0
pistillody-stamen	turquoise	GO:0048440	carpel development	198	3.8e-05	0.0046	TraesCS2B02G341800.2	0	0	0	0	0
pistillody-stamen	turquoise	GO:0048440	carpel development	198	3.8e-05	0.0046	TraesCS4A02G059000.1	0	0	1	0	0
pistillody-stamen	turquoise	GO:0048440	carpel development	198	3.8e-05	0.0046	TraesCS6D02G142900.1	0	0	0	0	0
pistillody-stamen	turquoise	GO:0048440	carpel development	198	3.8e-05	0.0046	TraesCS1D02G228900.1	0	0	0	0	0
pistillody-stamen	turquoise	GO:0048440	carpel development	198	3.8e-05	0.0046	TraesCS7B02G146100.1	0	0	1	0	0
pistillody-stamen	turquoise	GO:0048440	carpel development	198	3.8e-05	0.0046	TraesCS5A02G286800.1	0	0	0	0	0
pistillody-stamen	turquoise	GO:0048440	carpel development	198	3.8e-05	0.0046	TraesCS2A02G330000.1	0	0	0	0	0
pistillody-stamen	turquoise	GO:0048440	carpel development	198	3.8e-05	0.0046	TraesCS3A02G342300.1	0	0	0	0	0
pistillody-stamen	turquoise	GO:0048440	carpel development	198	3.8e-05	0.0046	TraesCS2D02G395000.1	0	0	1	0	0
pistillody-stamen	turquoise	GO:0048440	carpel development	198	3.8e-05	0.0046	TraesCS6B02G186700.1	0	0	0	0	0
pistillody-stamen	turquoise	GO:0048440	carpel development	198	3.8e-05	0.0046	TraesCS5A02G319200.1	0	0	0	0	0
pistillody-stamen	turquoise	GO:0048440	carpel development	198	3.8e-05	0.0046	TraesCS4D02G173100.1	0	0	0	0	0
pistillody-stamen	turquoise	GO:0048440	carpel development	198	3.8e-05	0.0046	TraesCS1D02G243300.1	0	0	0	0	0
pistillody-stamen	turquoise	GO:0048440	carpel development	198	3.8e-05	0.0046	TraesCS3A02G208100.2	0	0	0	0	0
pistillody-stamen	turquoise	GO:0048440	carpel development	198	3.8e-05	0.0046	TraesCS7D02G291200.3	0	0	1	0	0
pistillody-stamen	turquoise	GO:0048440	carpel development	198	3.8e-05	0.0046	TraesCS2A02G397200.1	0	0	1	0	0
pistillody-stamen	turquoise	GO:0048440	carpel development	198	3.8e-05	0.0046	TraesCS3B02G486000.1	0	0	0	0	0
pistillody-stamen	turquoise	GO:0048440	carpel development	198	3.8e-05	0.0046	TraesCS5B02G164300.1	0	0	0	0	0
pistillody-stamen	turquoise	GO:0048440	carpel development	198	3.8e-05	0.0046	TraesCS5A02G491400.1	0	0	0	0	0
pistillody-stamen	turquoise	GO:0048440	carpel development	198	3.8e-05	0.0046	TraesCS7D02G313000.1	0	0	1	0	0
pistillody-stamen	turquoise	GO:0048440	carpel development	198	3.8e-05	0.0046	TraesCS3B02G162500.2	0	0	0	0	0
pistillody-stamen	turquoise	GO:0048440	carpel development	198	3.8e-05	0.0046	TraesCS1D02G452700.1	0	0	0	0	0
pistillody-stamen	turquoise	GO:0048440	carpel development	198	3.8e-05	0.0046	TraesCS5A02G250600.1	0	0	0	0	0
pistillody-stamen	turquoise	GO:0048440	carpel development	198	3.8e-05	0.0046	TraesCS2B02G250900.1	0	0	0	0	0
pistillody-stamen	turquoise	GO:0048440	carpel development	198	3.8e-05	0.0046	TraesCS5A02G206700.1	0	0	0	0	0
pistillody-stamen	turquoise	GO:0048440	carpel development	198	3.8e-05	0.0046	TraesCS7A02G476700.1	0	0	0	0	0
pistillody-stamen	turquoise	GO:0048440	carpel development	198	3.8e-05	0.0046	TraesCS2D02G505400.1	0	0	0	0	0
pistillody-stamen	turquoise	GO:0048440	carpel development	198	3.8e-05	0.0046	TraesCS3D02G489400.1	0	0	0	0	0
pistillody-stamen	turquoise	GO:0048440	carpel development	198	3.8e-05	0.0046	TraesCS7D02G060400.1	0	0	0	0	0
pistillody-stamen	turquoise	GO:0048440	carpel development	198	3.8e-05	0.0046	TraesCS5A02G177300.1	0	0	0	0	0
pistillody-stamen	turquoise	GO:0048440	carpel development	198	3.8e-05	0.0046	TraesCS7B02G267900.1	0	0	1	0	0
pistillody-stamen	turquoise	GO:0048440	carpel development	198	3.8e-05	0.0046	TraesCS7A02G532900.1	0	0	0	0	0
pistillody-stamen	turquoise	GO:0048440	carpel development	198	3.8e-05	0.0046	TraesCS1A02G262700.1	0	0	0	0	0
pistillody-stamen	turquoise	GO:0048440	carpel development	198	3.8e-05	0.0046	TraesCS4D02G286400.1	0	0	1	0	0
pistillody-stamen	turquoise	GO:0048440	carpel development	198	3.8e-05	0.0046	TraesCS4B02G049800.1	0	0	0	0	0
pistillody-stamen	turquoise	GO:0048440	carpel development	198	3.8e-05	0.0046	TraesCS6A02G129700.1	0	0	0	0	0
pistillody-stamen	turquoise	GO:0048440	carpel development	198	3.8e-05	0.0046	TraesCS1D02G127700.1	0	0	0	0	0
pistillody-stamen	turquoise	GO:0048440	carpel development	198	3.8e-05	0.0046	TraesCS1B02G058600.1	0	0	0	0	0
pistillody-stamen	turquoise	GO:0048440	carpel development	198	3.8e-05	0.0046	TraesCS1B02G091700.1	0	0	0	0	0
pistillody-stamen	turquoise	GO:0048440	carpel development	198	3.8e-05	0.0046	TraesCS1B02G084500.1	0	0	1	0	0
pistillody-stamen	turquoise	GO:0048440	carpel development	198	3.8e-05	0.0046	TraesCS6A02G118100.1	0	0	0	0	0
pistillody-stamen	turquoise	GO:0048440	carpel development	198	3.8e-05	0.0046	TraesCS3B02G005900.1	0	0	0	0	0
pistillody-stamen	turquoise	GO:0048440	carpel development	198	3.8e-05	0.0046	TraesCS2D02G116700.1	0	0	1	0	0
pistillody-stamen	turquoise	GO:0048440	carpel development	198	3.8e-05	0.0046	TraesCS7A02G066200.1	0	0	0	0	0
pistillody-stamen	turquoise	GO:0048440	carpel development	198	3.8e-05	0.0046	TraesCS6A02G266400.2	0	0	0	0	0
pistillody-stamen	turquoise	GO:0048440	carpel development	198	3.8e-05	0.0046	TraesCS2B02G121100.1	0	0	0	0	0
pistillody-stamen	turquoise	GO:0048440	carpel development	198	3.8e-05	0.0046	TraesCS6D02G147400.1	0	0	0	0	0
pistillody-stamen	turquoise	GO:0048440	carpel development	198	3.8e-05	0.0046	TraesCS5A02G407500.2	0	0	1	0	0
pistillody-stamen	turquoise	GO:0048440	carpel development	198	3.8e-05	0.0046	TraesCS1A02G125800.1	0	0	0	0	0
pistillody-stamen	turquoise	GO:0048440	carpel development	198	3.8e-05	0.0046	TraesCS1B02G309800.1	0	0	0	0	0
pistillody-stamen	turquoise	GO:0048440	carpel development	198	3.8e-05	0.0046	TraesCS1B02G241400.1	0	0	0	0	0
pistillody-stamen	turquoise	GO:0048440	carpel development	198	3.8e-05	0.0046	TraesCS2D02G133800.1	0	0	0	0	0
pistillody-stamen	turquoise	GO:0048440	carpel development	198	3.8e-05	0.0046	TraesCS3A02G442000.1	0	0	0	0	0
pistillody-stamen	turquoise	GO:0048440	carpel development	198	3.8e-05	0.0046	TraesCS2A02G187800.1	0	0	1	0	0
pistillody-stamen	turquoise	GO:0048440	carpel development	198	3.8e-05	0.0046	TraesCS4D02G241100.1	0	0	0	0	0
pistillody-stamen	turquoise	GO:0048440	carpel development	198	3.8e-05	0.0046	TraesCS2D02G322600.1	0	0	0	0	0
pistillody-stamen	turquoise	GO:0048440	carpel development	198	3.8e-05	0.0046	TraesCS7B02G181700.1	0	0	1	0	0
pistillody-stamen	turquoise	GO:0048440	carpel development	198	3.8e-05	0.0046	TraesCS1B02G002000.1	0	0	0	0	0
pistillody-stamen	turquoise	GO:0048440	carpel development	198	3.8e-05	0.0046	TraesCS2D02G473700.1	0	0	1	0	0
pistillody-stamen	turquoise	GO:0048440	carpel development	198	3.8e-05	0.0046	TraesCS1A02G066200.1	0	0	1	0	0
pistillody-stamen	turquoise	GO:0048440	carpel development	198	3.8e-05	0.0046	TraesCS7D02G510400.1	0	0	0	0	0
pistillody-stamen	turquoise	GO:0048440	carpel development	198	3.8e-05	0.0046	TraesCS2D02G263500.1	0	0	0	0	0
pistillody-stamen	turquoise	GO:0048440	carpel development	198	3.8e-05	0.0046	TraesCS2A02G504700.1	0	0	0	0	0
pistillody-stamen	turquoise	GO:0048440	carpel development	198	3.8e-05	0.0046	TraesCS5A02G155100.1	0	0	0	0	0
pistillody-stamen	turquoise	GO:0048440	carpel development	198	3.8e-05	0.0046	TraesCS4D02G050200.1	0	0	1	0	0
pistillody-stamen	turquoise	GO:0048440	carpel development	198	3.8e-05	0.0046	TraesCS1D02G067200.1	0	0	0	0	0
pistillody-stamen	turquoise	GO:0048440	carpel development	198	3.8e-05	0.0046	TraesCS3B02G175300.1	0	0	0	0	0
pistillody-stamen	turquoise	GO:0048440	carpel development	198	3.8e-05	0.0046	TraesCS3D02G502600.1	0	0	1	0	0
pistillody-stamen	turquoise	GO:0048440	carpel development	198	3.8e-05	0.0046	TraesCS3B02G475800.1	0	0	0	0	0
pistillody-stamen	turquoise	GO:0048440	carpel development	198	3.8e-05	0.0046	TraesCS3B02G236500.1	0	0	0	0	0
pistillody-stamen	turquoise	GO:0048440	carpel development	198	3.8e-05	0.0046	TraesCS4A02G422700.1	0	0	0	0	0
pistillody-stamen	turquoise	GO:0048440	carpel development	198	3.8e-05	0.0046	TraesCS2B02G343800.1	0	0	0	0	0
pistillody-stamen	turquoise	GO:0048440	carpel development	198	3.8e-05	0.0046	TraesCS2A02G474000.1	0	0	0	0	0
pistillody-stamen	turquoise	GO:0048440	carpel development	198	3.8e-05	0.0046	TraesCS7A02G284900.2	0	0	1	0	0
pistillody-stamen	turquoise	GO:0048440	carpel development	198	3.8e-05	0.0046	TraesCS5A02G167300.2	0	0	0	0	0
pistillody-stamen	turquoise	GO:0048440	carpel development	198	3.8e-05	0.0046	TraesCS3D02G054400.1	0	0	0	0	0
pistillody-stamen	turquoise	GO:0048440	carpel development	198	3.8e-05	0.0046	TraesCS3A02G142200.1	0	0	0	0	0
pistillody-stamen	turquoise	GO:0048440	carpel development	198	3.8e-05	0.0046	TraesCS1D02G262700.1	0	0	0	0	0
pistillody-stamen	turquoise	GO:0048440	carpel development	198	3.8e-05	0.0046	TraesCS3A02G140100.1	0	0	1	0	0
pistillody-stamen	turquoise	GO:0048440	carpel development	198	3.8e-05	0.0046	TraesCS7B02G208600.1	0	0	0	0	0
pistillody-stamen	turquoise	GO:0048497	maintenance of floral organ identity	21	4.9e-10	1.4e-07	TraesCS1A02G125800.1	0	0	0	0	0
pistillody-stamen	turquoise	GO:0048497	maintenance of floral organ identity	21	4.9e-10	1.4e-07	TraesCS1A02G193400.1	0	0	0	0	0
pistillody-stamen	turquoise	GO:0048497	maintenance of floral organ identity	21	4.9e-10	1.4e-07	TraesCS5B02G115100.1	0	0	0	0	0
pistillody-stamen	turquoise	GO:0048497	maintenance of floral organ identity	21	4.9e-10	1.4e-07	TraesCS1D02G197300.1	0	0	0	0	0
pistillody-stamen	turquoise	GO:0048497	maintenance of floral organ identity	21	4.9e-10	1.4e-07	TraesCS7D02G168700.1	0	0	0	0	0
pistillody-stamen	turquoise	GO:0048497	maintenance of floral organ identity	21	4.9e-10	1.4e-07	TraesCS7D02G305200.2	0	0	1	0	0
pistillody-stamen	turquoise	GO:0048497	maintenance of floral organ identity	21	4.9e-10	1.4e-07	TraesCS1B02G144800.3	0	0	0	0	0
pistillody-stamen	turquoise	GO:0048497	maintenance of floral organ identity	21	4.9e-10	1.4e-07	TraesCS7A02G308400.1	0	0	1	0	0
pistillody-stamen	turquoise	GO:0048497	maintenance of floral organ identity	21	4.9e-10	1.4e-07	TraesCS6A02G324500.1	0	0	1	0	0
pistillody-stamen	turquoise	GO:0048497	maintenance of floral organ identity	21	4.9e-10	1.4e-07	TraesCS1B02G208400.1	0	0	0	0	0
pistillody-stamen	turquoise	GO:0048497	maintenance of floral organ identity	21	4.9e-10	1.4e-07	TraesCS6D02G304300.1	0	0	1	0	0
pistillody-stamen	turquoise	GO:0048497	maintenance of floral organ identity	21	4.9e-10	1.4e-07	TraesCS7A02G167900.1	0	0	0	0	0
pistillody-stamen	turquoise	GO:0048497	maintenance of floral organ identity	21	4.9e-10	1.4e-07	TraesCS2A02G474000.1	0	0	0	0	0
pistillody-stamen	turquoise	GO:0048497	maintenance of floral organ identity	21	4.9e-10	1.4e-07	TraesCS2D02G473700.1	0	0	1	0	0
pistillody-stamen	turquoise	GO:0048497	maintenance of floral organ identity	21	4.9e-10	1.4e-07	TraesCS2B02G497500.1	0	0	1	0	0
pistillody-stamen	turquoise	GO:0048497	maintenance of floral organ identity	21	4.9e-10	1.4e-07	TraesCS3B02G157500.1	0	0	0	0	0
pistillody-stamen	turquoise	GO:0048497	maintenance of floral organ identity	21	4.9e-10	1.4e-07	TraesCS7B02G072700.1	0	0	0	0	0
pistillody-stamen	turquoise	GO:0048497	maintenance of floral organ identity	21	4.9e-10	1.4e-07	TraesCS6A02G255800.1	0	0	0	0	0
pistillody-stamen	turquoise	GO:0048497	maintenance of floral organ identity	21	4.9e-10	1.4e-07	TraesCS6B02G354900.1	0	0	1	0	0
pistillody-stamen	turquoise	GO:0048497	maintenance of floral organ identity	21	4.9e-10	1.4e-07	TraesCS1D02G127700.1	0	0	0	0	0
pistillody-stamen	turquoise	GO:0048497	maintenance of floral organ identity	21	4.9e-10	1.4e-07	TraesCS7B02G208600.1	0	0	0	0	0
pistillody-stamen	turquoise	GO:0010093	specification of floral organ identity	31	2.9e-05	0.0036	TraesCS5D02G170100.1	0	0	0	0	0
pistillody-stamen	turquoise	GO:0010093	specification of floral organ identity	31	2.9e-05	0.0036	TraesCS2A02G514200.1	0	0	0	0	0
pistillody-stamen	turquoise	GO:0010093	specification of floral organ identity	31	2.9e-05	0.0036	TraesCS1B02G377100.1	0	0	0	0	0
pistillody-stamen	turquoise	GO:0010093	specification of floral organ identity	31	2.9e-05	0.0036	TraesCS7A02G532900.1	0	0	0	0	0
pistillody-stamen	turquoise	GO:0010093	specification of floral organ identity	31	2.9e-05	0.0036	TraesCS6B02G286400.2	0	0	0	0	0
pistillody-stamen	turquoise	GO:0010093	specification of floral organ identity	31	2.9e-05	0.0036	TraesCS4D02G286400.1	0	0	1	0	0
pistillody-stamen	turquoise	GO:0010093	specification of floral organ identity	31	2.9e-05	0.0036	TraesCS1D02G162600.1	0	0	0	0	0
pistillody-stamen	turquoise	GO:0010093	specification of floral organ identity	31	2.9e-05	0.0036	TraesCS1B02G091700.1	0	0	0	0	0
pistillody-stamen	turquoise	GO:0010093	specification of floral organ identity	31	2.9e-05	0.0036	TraesCS4A02G016600.1	0	0	1	0	0
pistillody-stamen	turquoise	GO:0010093	specification of floral organ identity	31	2.9e-05	0.0036	TraesCS3B02G040200.1	0	0	0	0	0
pistillody-stamen	turquoise	GO:0010093	specification of floral organ identity	31	2.9e-05	0.0036	TraesCS1B02G144800.3	0	0	0	0	0
pistillody-stamen	turquoise	GO:0010093	specification of floral organ identity	31	2.9e-05	0.0036	TraesCS5B02G286100.2	0	0	0	0	0
pistillody-stamen	turquoise	GO:0010093	specification of floral organ identity	31	2.9e-05	0.0036	TraesCS4A02G058800.1	0	0	0	0	0
pistillody-stamen	turquoise	GO:0010093	specification of floral organ identity	31	2.9e-05	0.0036	TraesCS5D02G284200.4	0	0	0	0	0
pistillody-stamen	turquoise	GO:0010093	specification of floral organ identity	31	2.9e-05	0.0036	TraesCS6D02G240200.2	0	0	0	0	0
pistillody-stamen	turquoise	GO:0010093	specification of floral organ identity	31	2.9e-05	0.0036	TraesCS1A02G125800.1	0	0	0	0	0
pistillody-stamen	turquoise	GO:0010093	specification of floral organ identity	31	2.9e-05	0.0036	TraesCS1A02G360700.2	0	0	0	0	0
pistillody-stamen	turquoise	GO:0010093	specification of floral organ identity	31	2.9e-05	0.0036	TraesCS5B02G276400.1	0	0	0	0	0
pistillody-stamen	turquoise	GO:0010093	specification of floral organ identity	31	2.9e-05	0.0036	TraesCS1D02G127700.1	0	0	0	0	0
pistillody-stamen	turquoise	GO:0010093	specification of floral organ identity	31	2.9e-05	0.0036	TraesCS1A02G176300.1	0	0	0	0	0
pistillody-stamen	turquoise	GO:0010093	specification of floral organ identity	31	2.9e-05	0.0036	TraesCS1B02G203800.1	0	0	0	0	0
pistillody-stamen	turquoise	GO:0010093	specification of floral organ identity	31	2.9e-05	0.0036	TraesCS2A02G338200.1	0	0	0	0	0
pistillody-stamen	turquoise	GO:0010093	specification of floral organ identity	31	2.9e-05	0.0036	TraesCS4B02G287600.1	0	0	0	0	0
pistillody-stamen	turquoise	GO:0010093	specification of floral organ identity	31	2.9e-05	0.0036	TraesCS2B02G542400.2	0	0	0	0	0
pistillody-stamen	turquoise	GO:0010093	specification of floral organ identity	31	2.9e-05	0.0036	TraesCS5A02G286800.1	0	0	0	0	0
pistillody-stamen	turquoise	GO:0010093	specification of floral organ identity	31	2.9e-05	0.0036	TraesCS6A02G259000.1	0	0	0	0	0
pistillody-stamen	turquoise	GO:0010093	specification of floral organ identity	31	2.9e-05	0.0036	TraesCS1D02G365100.1	0	0	0	0	0
pistillody-stamen	turquoise	GO:0010093	specification of floral organ identity	31	2.9e-05	0.0036	TraesCS2D02G159900.1	0	0	0	0	0
pistillody-stamen	turquoise	GO:0010093	specification of floral organ identity	31	2.9e-05	0.0036	TraesCS2B02G343800.1	0	0	0	0	0
pistillody-stamen	turquoise	GO:0010093	specification of floral organ identity	31	2.9e-05	0.0036	TraesCS3B02G157500.1	0	0	0	0	0
pistillody-stamen	turquoise	GO:0010093	specification of floral organ identity	31	2.9e-05	0.0036	TraesCS5D02G294500.1	0	0	0	0	0
pistillody-stamen	turquoise	GO:0048438	floral whorl development	377	7.2e-05	0.0079	TraesCS6A02G308600.1	0	0	0	0	0
pistillody-stamen	turquoise	GO:0048438	floral whorl development	377	7.2e-05	0.0079	TraesCS2B02G138400.1	0	0	0	0	0
pistillody-stamen	turquoise	GO:0048438	floral whorl development	377	7.2e-05	0.0079	TraesCS4D02G099400.1	0	0	0	0	0
pistillody-stamen	turquoise	GO:0048438	floral whorl development	377	7.2e-05	0.0079	TraesCS2D02G054600.1	0	0	0	0	0
pistillody-stamen	turquoise	GO:0048438	floral whorl development	377	7.2e-05	0.0079	TraesCS7A02G308400.1	0	0	1	0	0
pistillody-stamen	turquoise	GO:0048438	floral whorl development	377	7.2e-05	0.0079	TraesCS2D02G395000.1	0	0	1	0	0
pistillody-stamen	turquoise	GO:0048438	floral whorl development	377	7.2e-05	0.0079	TraesCS5B02G319600.1	0	0	0	0	0
pistillody-stamen	turquoise	GO:0048438	floral whorl development	377	7.2e-05	0.0079	TraesCS3B02G374400.1	0	0	0	0	0
pistillody-stamen	turquoise	GO:0048438	floral whorl development	377	7.2e-05	0.0079	TraesCS3B02G003800.1	0	0	0	0	0
pistillody-stamen	turquoise	GO:0048438	floral whorl development	377	7.2e-05	0.0079	TraesCS2A02G232400.1	0	0	0	0	0
pistillody-stamen	turquoise	GO:0048438	floral whorl development	377	7.2e-05	0.0079	TraesCS1B02G114500.1	0	0	0	0	0
pistillody-stamen	turquoise	GO:0048438	floral whorl development	377	7.2e-05	0.0079	TraesCS5B02G115100.1	0	0	0	0	0
pistillody-stamen	turquoise	GO:0048438	floral whorl development	377	7.2e-05	0.0079	TraesCS4A02G133800.1	0	0	0	0	0
pistillody-stamen	turquoise	GO:0048438	floral whorl development	377	7.2e-05	0.0079	TraesCS3A02G282300.1	0	0	0	0	0
pistillody-stamen	turquoise	GO:0048438	floral whorl development	377	7.2e-05	0.0079	TraesCS6B02G151900.1	0	0	1	0	0
pistillody-stamen	turquoise	GO:0048438	floral whorl development	377	7.2e-05	0.0079	TraesCS3B02G502600.1	0	0	0	0	0
pistillody-stamen	turquoise	GO:0048438	floral whorl development	377	7.2e-05	0.0079	TraesCS7A02G492400.1	0	0	0	0	0
pistillody-stamen	turquoise	GO:0048438	floral whorl development	377	7.2e-05	0.0079	TraesCS3D02G360400.2	0	0	0	0	0
pistillody-stamen	turquoise	GO:0048438	floral whorl development	377	7.2e-05	0.0079	TraesCS1A02G225100.1	0	0	0	0	0
pistillody-stamen	turquoise	GO:0048438	floral whorl development	377	7.2e-05	0.0079	TraesCS5A02G513200.1	0	0	0	0	0
pistillody-stamen	turquoise	GO:0048438	floral whorl development	377	7.2e-05	0.0079	TraesCS4A02G275900.1	0	0	0	0	0
pistillody-stamen	turquoise	GO:0048438	floral whorl development	377	7.2e-05	0.0079	TraesCS4D02G125300.1	0	0	0	0	0
pistillody-stamen	turquoise	GO:0048438	floral whorl development	377	7.2e-05	0.0079	TraesCS5A02G118700.2	0	0	0	0	0
pistillody-stamen	turquoise	GO:0048438	floral whorl development	377	7.2e-05	0.0079	TraesCS7B02G303300.1	0	0	0	0	0
pistillody-stamen	turquoise	GO:0048438	floral whorl development	377	7.2e-05	0.0079	TraesCS7B02G072700.1	0	0	0	0	0
pistillody-stamen	turquoise	GO:0048438	floral whorl development	377	7.2e-05	0.0079	TraesCS1B02G479300.1	0	0	1	0	0
pistillody-stamen	turquoise	GO:0048438	floral whorl development	377	7.2e-05	0.0079	TraesCS2A02G243300.4	0	0	0	0	0
pistillody-stamen	turquoise	GO:0048438	floral whorl development	377	7.2e-05	0.0079	TraesCS7A02G167900.1	0	0	0	0	0
pistillody-stamen	turquoise	GO:0048438	floral whorl development	377	7.2e-05	0.0079	TraesCS1A02G072200.1	0	0	0	0	0
pistillody-stamen	turquoise	GO:0048438	floral whorl development	377	7.2e-05	0.0079	TraesCS4B02G344300.1	0	0	0	0	0
pistillody-stamen	turquoise	GO:0048438	floral whorl development	377	7.2e-05	0.0079	TraesCS7A02G544700.2	0	0	0	0	0
pistillody-stamen	turquoise	GO:0048438	floral whorl development	377	7.2e-05	0.0079	TraesCS7D02G397800.1	0	0	0	0	0
pistillody-stamen	turquoise	GO:0048438	floral whorl development	377	7.2e-05	0.0079	TraesCS3A02G442200.1	0	0	0	0	0
pistillody-stamen	turquoise	GO:0048438	floral whorl development	377	7.2e-05	0.0079	TraesCS5B02G032000.1	0	0	0	0	0
pistillody-stamen	turquoise	GO:0048438	floral whorl development	377	7.2e-05	0.0079	TraesCS4A02G265100.1	0	0	1	0	0
pistillody-stamen	turquoise	GO:0048438	floral whorl development	377	7.2e-05	0.0079	TraesCS3B02G591000.1	0	0	0	0	0
pistillody-stamen	turquoise	GO:0048438	floral whorl development	377	7.2e-05	0.0079	TraesCS1D02G364800.1	0	0	0	0	0
pistillody-stamen	turquoise	GO:0048438	floral whorl development	377	7.2e-05	0.0079	TraesCS3A02G461400.1	0	0	0	0	0
pistillody-stamen	turquoise	GO:0048438	floral whorl development	377	7.2e-05	0.0079	TraesCS2B02G191500.1	0	0	0	0	0
pistillody-stamen	turquoise	GO:0048438	floral whorl development	377	7.2e-05	0.0079	TraesCS3D02G163600.1	0	0	0	0	0
pistillody-stamen	turquoise	GO:0048438	floral whorl development	377	7.2e-05	0.0079	TraesCS1B02G168500.1	0	0	0	0	0
pistillody-stamen	turquoise	GO:0048438	floral whorl development	377	7.2e-05	0.0079	TraesCS2B02G219300.1	0	0	1	0	0
pistillody-stamen	turquoise	GO:0048438	floral whorl development	377	7.2e-05	0.0079	TraesCS1B02G273100.2	0	0	1	0	0
pistillody-stamen	turquoise	GO:0048438	floral whorl development	377	7.2e-05	0.0079	TraesCS3A02G379400.1	0	0	0	0	0
pistillody-stamen	turquoise	GO:0048438	floral whorl development	377	7.2e-05	0.0079	TraesCS2D02G232800.1	0	0	0	0	0
pistillody-stamen	turquoise	GO:0048438	floral whorl development	377	7.2e-05	0.0079	TraesCS3D02G434500.1	0	0	0	0	0
pistillody-stamen	turquoise	GO:0048438	floral whorl development	377	7.2e-05	0.0079	TraesCS2D02G172500.1	0	0	0	0	0
pistillody-stamen	turquoise	GO:0048438	floral whorl development	377	7.2e-05	0.0079	TraesCS2B02G341800.2	0	0	0	0	0
pistillody-stamen	turquoise	GO:0048438	floral whorl development	377	7.2e-05	0.0079	TraesCS2A02G338200.1	0	0	0	0	0
pistillody-stamen	turquoise	GO:0048438	floral whorl development	377	7.2e-05	0.0079	TraesCS7B02G208600.1	0	0	0	0	0
pistillody-stamen	turquoise	GO:0048438	floral whorl development	377	7.2e-05	0.0079	TraesCS5B02G159900.5	0	0	0	0	0
pistillody-stamen	turquoise	GO:0048438	floral whorl development	377	7.2e-05	0.0079	TraesCS3B02G577900.1	0	0	0	0	0
pistillody-stamen	turquoise	GO:0048438	floral whorl development	377	7.2e-05	0.0079	TraesCS6D02G278700.1	0	0	0	0	0
pistillody-stamen	turquoise	GO:0048438	floral whorl development	377	7.2e-05	0.0079	TraesCS1D02G243300.1	0	0	0	0	0
pistillody-stamen	turquoise	GO:0048438	floral whorl development	377	7.2e-05	0.0079	TraesCS4A02G195800.1	0	0	0	0	0
pistillody-stamen	turquoise	GO:0048438	floral whorl development	377	7.2e-05	0.0079	TraesCS6B02G104100.1	0	0	0	0	0
pistillody-stamen	turquoise	GO:0048438	floral whorl development	377	7.2e-05	0.0079	TraesCS3A02G072700.1	0	0	0	0	0
pistillody-stamen	turquoise	GO:0048438	floral whorl development	377	7.2e-05	0.0079	TraesCS5A02G250600.1	0	0	0	0	0
pistillody-stamen	turquoise	GO:0048438	floral whorl development	377	7.2e-05	0.0079	TraesCS1A02G262500.1	0	0	1	0	0
pistillody-stamen	turquoise	GO:0048438	floral whorl development	377	7.2e-05	0.0079	TraesCS3D02G489400.1	0	0	0	0	0
pistillody-stamen	turquoise	GO:0048438	floral whorl development	377	7.2e-05	0.0079	TraesCS5A02G487200.1	0	0	1	0	0
pistillody-stamen	turquoise	GO:0048438	floral whorl development	377	7.2e-05	0.0079	TraesCS6A02G069500.1	0	0	0	0	0
pistillody-stamen	turquoise	GO:0048438	floral whorl development	377	7.2e-05	0.0079	TraesCS1A02G262700.1	0	0	0	0	0
pistillody-stamen	turquoise	GO:0048438	floral whorl development	377	7.2e-05	0.0079	TraesCS4D02G286400.1	0	0	1	0	0
pistillody-stamen	turquoise	GO:0048438	floral whorl development	377	7.2e-05	0.0079	TraesCS6A02G129700.1	0	0	0	0	0
pistillody-stamen	turquoise	GO:0048438	floral whorl development	377	7.2e-05	0.0079	TraesCS5B02G037900.1	0	0	0	0	0
pistillody-stamen	turquoise	GO:0048438	floral whorl development	377	7.2e-05	0.0079	TraesCS6A02G266400.2	0	0	0	0	0
pistillody-stamen	turquoise	GO:0048438	floral whorl development	377	7.2e-05	0.0079	TraesCS1A02G125800.1	0	0	0	0	0
pistillody-stamen	turquoise	GO:0048438	floral whorl development	377	7.2e-05	0.0079	TraesCS5D02G388700.1	0	0	0	0	0
pistillody-stamen	turquoise	GO:0048438	floral whorl development	377	7.2e-05	0.0079	TraesCS4A02G119800.1	0	0	1	0	0
pistillody-stamen	turquoise	GO:0048438	floral whorl development	377	7.2e-05	0.0079	TraesCS2A02G187800.1	0	0	1	0	0
pistillody-stamen	turquoise	GO:0048438	floral whorl development	377	7.2e-05	0.0079	TraesCS5A02G286700.1	0	0	0	0	0
pistillody-stamen	turquoise	GO:0048438	floral whorl development	377	7.2e-05	0.0079	TraesCS7B02G181700.1	0	0	1	0	0
pistillody-stamen	turquoise	GO:0048438	floral whorl development	377	7.2e-05	0.0079	TraesCS2D02G473700.1	0	0	1	0	0
pistillody-stamen	turquoise	GO:0048438	floral whorl development	377	7.2e-05	0.0079	TraesCS7D02G510400.1	0	0	0	0	0
pistillody-stamen	turquoise	GO:0048438	floral whorl development	377	7.2e-05	0.0079	TraesCS4D02G050200.1	0	0	1	0	0
pistillody-stamen	turquoise	GO:0048438	floral whorl development	377	7.2e-05	0.0079	TraesCS1D02G067200.1	0	0	0	0	0
pistillody-stamen	turquoise	GO:0048438	floral whorl development	377	7.2e-05	0.0079	TraesCS1A02G350800.1	0	0	0	0	0
pistillody-stamen	turquoise	GO:0048438	floral whorl development	377	7.2e-05	0.0079	TraesCS3D02G502600.1	0	0	1	0	0
pistillody-stamen	turquoise	GO:0048438	floral whorl development	377	7.2e-05	0.0079	TraesCS2B02G548500.1	0	0	0	0	0
pistillody-stamen	turquoise	GO:0048438	floral whorl development	377	7.2e-05	0.0079	TraesCS2B02G343800.1	0	0	0	0	0
pistillody-stamen	turquoise	GO:0048438	floral whorl development	377	7.2e-05	0.0079	TraesCS2A02G474000.1	0	0	0	0	0
pistillody-stamen	turquoise	GO:0048438	floral whorl development	377	7.2e-05	0.0079	TraesCS7A02G059000.1	0	0	0	0	0
pistillody-stamen	turquoise	GO:0048438	floral whorl development	377	7.2e-05	0.0079	TraesCS1B02G365000.1	0	0	0	0	0
pistillody-stamen	turquoise	GO:0048438	floral whorl development	377	7.2e-05	0.0079	TraesCS7D02G257000.1	0	0	0	0	0
pistillody-stamen	turquoise	GO:0048438	floral whorl development	377	7.2e-05	0.0079	TraesCS2A02G344300.1	0	0	0	0	0
pistillody-stamen	turquoise	GO:0048438	floral whorl development	377	7.2e-05	0.0079	TraesCS3B02G607600.1	0	0	0	0	0
pistillody-stamen	turquoise	GO:0048438	floral whorl development	377	7.2e-05	0.0079	TraesCS3D02G497300.1	0	0	0	0	0
pistillody-stamen	turquoise	GO:0048438	floral whorl development	377	7.2e-05	0.0079	TraesCS2D02G014700.1	0	0	0	0	0
pistillody-stamen	turquoise	GO:0048438	floral whorl development	377	7.2e-05	0.0079	TraesCS6B02G445800.1	0	0	0	0	0
pistillody-stamen	turquoise	GO:0048438	floral whorl development	377	7.2e-05	0.0079	TraesCS5B02G286000.1	0	0	0	0	0
pistillody-stamen	turquoise	GO:0048438	floral whorl development	377	7.2e-05	0.0079	TraesCS3A02G208100.2	0	0	0	0	0
pistillody-stamen	turquoise	GO:0048438	floral whorl development	377	7.2e-05	0.0079	TraesCS3D02G397200.1	0	0	1	0	0
pistillody-stamen	turquoise	GO:0048438	floral whorl development	377	7.2e-05	0.0079	TraesCS3D02G219500.1	0	0	0	0	0
pistillody-stamen	turquoise	GO:0048438	floral whorl development	377	7.2e-05	0.0079	TraesCS2D02G285000.1	0	0	0	0	0
pistillody-stamen	turquoise	GO:0048438	floral whorl development	377	7.2e-05	0.0079	TraesCS7D02G082800.1	0	0	0	0	0
pistillody-stamen	turquoise	GO:0048438	floral whorl development	377	7.2e-05	0.0079	TraesCS3D02G516900.1	0	0	0	0	0
pistillody-stamen	turquoise	GO:0048438	floral whorl development	377	7.2e-05	0.0079	TraesCS1A02G236900.2	0	0	0	0	0
pistillody-stamen	turquoise	GO:0048438	floral whorl development	377	7.2e-05	0.0079	TraesCS4B02G091400.1	0	0	0	0	0
pistillody-stamen	turquoise	GO:0048438	floral whorl development	377	7.2e-05	0.0079	TraesCS3D02G442000.1	0	0	0	0	0
pistillody-stamen	turquoise	GO:0048438	floral whorl development	377	7.2e-05	0.0079	TraesCS2A02G422400.1	0	0	0	0	0
pistillody-stamen	turquoise	GO:0048438	floral whorl development	377	7.2e-05	0.0079	TraesCS4D02G233200.1	0	0	0	0	0
pistillody-stamen	turquoise	GO:0048438	floral whorl development	377	7.2e-05	0.0079	TraesCS1D02G262400.1	0	0	1	0	0
pistillody-stamen	turquoise	GO:0048438	floral whorl development	377	7.2e-05	0.0079	TraesCS6B02G160900.1	0	0	0	0	0
pistillody-stamen	turquoise	GO:0048438	floral whorl development	377	7.2e-05	0.0079	TraesCS5D02G294500.1	0	0	0	0	0
pistillody-stamen	turquoise	GO:0048438	floral whorl development	377	7.2e-05	0.0079	TraesCS5D02G550700.1	0	0	1	0	0
pistillody-stamen	turquoise	GO:0048438	floral whorl development	377	7.2e-05	0.0079	TraesCS5D02G063500.1	0	0	0	0	0
pistillody-stamen	turquoise	GO:0048438	floral whorl development	377	7.2e-05	0.0079	TraesCS5A02G390300.2	0	0	0	0	0
pistillody-stamen	turquoise	GO:0048438	floral whorl development	377	7.2e-05	0.0079	TraesCS4D02G088400.1	0	0	1	0	0
pistillody-stamen	turquoise	GO:0048438	floral whorl development	377	7.2e-05	0.0079	TraesCS7A02G404400.1	0	0	0	0	0
pistillody-stamen	turquoise	GO:0048438	floral whorl development	377	7.2e-05	0.0079	TraesCS1D02G346800.1	0	0	0	0	0
pistillody-stamen	turquoise	GO:0048438	floral whorl development	377	7.2e-05	0.0079	TraesCS7D02G375900.1	0	0	0	0	0
pistillody-stamen	turquoise	GO:0048438	floral whorl development	377	7.2e-05	0.0079	TraesCS2A02G478800.1	0	0	0	0	0
pistillody-stamen	turquoise	GO:0048438	floral whorl development	377	7.2e-05	0.0079	TraesCS6B02G173200.1	0	0	0	0	0
pistillody-stamen	turquoise	GO:0048438	floral whorl development	377	7.2e-05	0.0079	TraesCS5A02G343100.1	0	0	0	0	0
pistillody-stamen	turquoise	GO:0048438	floral whorl development	377	7.2e-05	0.0079	TraesCS3D02G191600.4	0	0	1	0	0
pistillody-stamen	turquoise	GO:0048438	floral whorl development	377	7.2e-05	0.0079	TraesCS3A02G282200.1	0	0	0	0	0
pistillody-stamen	turquoise	GO:0048438	floral whorl development	377	7.2e-05	0.0079	TraesCS3B02G248200.1	0	0	1	0	0
pistillody-stamen	turquoise	GO:0048438	floral whorl development	377	7.2e-05	0.0079	TraesCS3B02G157500.1	0	0	0	0	0
pistillody-stamen	turquoise	GO:0048438	floral whorl development	377	7.2e-05	0.0079	TraesCS5B02G501000.1	0	0	1	0	0
pistillody-stamen	turquoise	GO:0048438	floral whorl development	377	7.2e-05	0.0079	TraesCS2D02G103800.1	0	0	0	0	0
pistillody-stamen	turquoise	GO:0048438	floral whorl development	377	7.2e-05	0.0079	TraesCS1D02G416100.1	0	0	0	0	0
pistillody-stamen	turquoise	GO:0048438	floral whorl development	377	7.2e-05	0.0079	TraesCS5D02G040800.1	0	0	0	0	0
pistillody-stamen	turquoise	GO:0048438	floral whorl development	377	7.2e-05	0.0079	TraesCS4D02G235800.1	0	0	1	0	0
pistillody-stamen	turquoise	GO:0048438	floral whorl development	377	7.2e-05	0.0079	TraesCS4D02G132100.1	0	0	0	0	0
pistillody-stamen	turquoise	GO:0048438	floral whorl development	377	7.2e-05	0.0079	TraesCS1A02G066200.1	0	0	1	0	0
pistillody-stamen	turquoise	GO:0048438	floral whorl development	377	7.2e-05	0.0079	TraesCS3B02G435700.1	0	0	1	0	0
pistillody-stamen	turquoise	GO:0048438	floral whorl development	377	7.2e-05	0.0079	TraesCS6A02G324500.1	0	0	1	0	0
pistillody-stamen	turquoise	GO:0048438	floral whorl development	377	7.2e-05	0.0079	TraesCS3A02G449300.2	0	0	0	0	0
pistillody-stamen	turquoise	GO:0048438	floral whorl development	377	7.2e-05	0.0079	TraesCS6D02G107300.1	0	0	0	0	0
pistillody-stamen	turquoise	GO:0048438	floral whorl development	377	7.2e-05	0.0079	TraesCS1A02G404600.1	0	0	0	0	0
pistillody-stamen	turquoise	GO:0048438	floral whorl development	377	7.2e-05	0.0079	TraesCS5A02G245800.1	0	0	0	0	0
pistillody-stamen	turquoise	GO:0048438	floral whorl development	377	7.2e-05	0.0079	TraesCS4B02G137400.1	0	0	0	0	0
pistillody-stamen	turquoise	GO:0048438	floral whorl development	377	7.2e-05	0.0079	TraesCS7D02G068400.1	0	0	0	0	0
pistillody-stamen	turquoise	GO:0048438	floral whorl development	377	7.2e-05	0.0079	TraesCS6D02G240200.2	0	0	0	0	0
pistillody-stamen	turquoise	GO:0048438	floral whorl development	377	7.2e-05	0.0079	TraesCS7A02G311800.1	0	0	0	0	0
pistillody-stamen	turquoise	GO:0048438	floral whorl development	377	7.2e-05	0.0079	TraesCS1A02G444500.1	0	0	0	0	0
pistillody-stamen	turquoise	GO:0048438	floral whorl development	377	7.2e-05	0.0079	TraesCS1D02G095500.1	0	0	0	0	0
pistillody-stamen	turquoise	GO:0048438	floral whorl development	377	7.2e-05	0.0079	TraesCS1B02G002000.1	0	0	0	0	0
pistillody-stamen	turquoise	GO:0048438	floral whorl development	377	7.2e-05	0.0079	TraesCS2B02G550700.1	0	0	0	0	0
pistillody-stamen	turquoise	GO:0048438	floral whorl development	377	7.2e-05	0.0079	TraesCS3D02G234500.1	0	0	0	0	0
pistillody-stamen	turquoise	GO:0048438	floral whorl development	377	7.2e-05	0.0079	TraesCS7B02G281100.1	0	0	0	0	0
pistillody-stamen	turquoise	GO:0048438	floral whorl development	377	7.2e-05	0.0079	TraesCS6B02G186700.1	0	0	0	0	0
pistillody-stamen	turquoise	GO:0048438	floral whorl development	377	7.2e-05	0.0079	TraesCS2D02G523100.2	0	0	0	0	0
pistillody-stamen	turquoise	GO:0048438	floral whorl development	377	7.2e-05	0.0079	TraesCS4D02G173100.1	0	0	0	0	0
pistillody-stamen	turquoise	GO:0048438	floral whorl development	377	7.2e-05	0.0079	TraesCS1B02G473400.1	0	0	0	0	0
pistillody-stamen	turquoise	GO:0048438	floral whorl development	377	7.2e-05	0.0079	TraesCS5B02G164300.1	0	0	0	0	0
pistillody-stamen	turquoise	GO:0048438	floral whorl development	377	7.2e-05	0.0079	TraesCS7B02G402300.1	0	0	0	0	0
pistillody-stamen	turquoise	GO:0048438	floral whorl development	377	7.2e-05	0.0079	TraesCS7A02G532900.1	0	0	0	0	0
pistillody-stamen	turquoise	GO:0048438	floral whorl development	377	7.2e-05	0.0079	TraesCS5A02G206700.1	0	0	0	0	0
pistillody-stamen	turquoise	GO:0048438	floral whorl development	377	7.2e-05	0.0079	TraesCS1B02G091700.1	0	0	0	0	0
pistillody-stamen	turquoise	GO:0048438	floral whorl development	377	7.2e-05	0.0079	TraesCS6A02G118100.1	0	0	0	0	0
pistillody-stamen	turquoise	GO:0048438	floral whorl development	377	7.2e-05	0.0079	TraesCS2D02G116700.1	0	0	1	0	0
pistillody-stamen	turquoise	GO:0048438	floral whorl development	377	7.2e-05	0.0079	TraesCS6D02G219500.1	0	0	0	0	0
pistillody-stamen	turquoise	GO:0048438	floral whorl development	377	7.2e-05	0.0079	TraesCS6D02G147400.1	0	0	0	0	0
pistillody-stamen	turquoise	GO:0048438	floral whorl development	377	7.2e-05	0.0079	TraesCS5A02G407500.2	0	0	1	0	0
pistillody-stamen	turquoise	GO:0048438	floral whorl development	377	7.2e-05	0.0079	TraesCS3D02G434900.1	0	0	1	0	0
pistillody-stamen	turquoise	GO:0048438	floral whorl development	377	7.2e-05	0.0079	TraesCS7A02G270900.1	0	0	0	0	0
pistillody-stamen	turquoise	GO:0048438	floral whorl development	377	7.2e-05	0.0079	TraesCS1D02G452700.1	0	0	0	0	0
pistillody-stamen	turquoise	GO:0048438	floral whorl development	377	7.2e-05	0.0079	TraesCS4D02G241100.1	0	0	0	0	0
pistillody-stamen	turquoise	GO:0048438	floral whorl development	377	7.2e-05	0.0079	TraesCS2D02G322600.1	0	0	0	0	0
pistillody-stamen	turquoise	GO:0048438	floral whorl development	377	7.2e-05	0.0079	TraesCS7D02G465100.1	0	0	0	0	0
pistillody-stamen	turquoise	GO:0048438	floral whorl development	377	7.2e-05	0.0079	TraesCS3D02G221900.1	0	0	0	0	0
pistillody-stamen	turquoise	GO:0048438	floral whorl development	377	7.2e-05	0.0079	TraesCS4B02G287600.1	0	0	0	0	0
pistillody-stamen	turquoise	GO:0048438	floral whorl development	377	7.2e-05	0.0079	TraesCS6B02G354900.1	0	0	1	0	0
pistillody-stamen	turquoise	GO:0048438	floral whorl development	377	7.2e-05	0.0079	TraesCS4A02G180100.1	0	0	0	0	0
pistillody-stamen	turquoise	GO:0048438	floral whorl development	377	7.2e-05	0.0079	TraesCS5A02G167300.2	0	0	0	0	0
pistillody-stamen	turquoise	GO:0048438	floral whorl development	377	7.2e-05	0.0079	TraesCS3A02G140100.1	0	0	1	0	0
pistillody-stamen	turquoise	GO:0048438	floral whorl development	377	7.2e-05	0.0079	TraesCS3A02G142200.1	0	0	0	0	0
pistillody-stamen	turquoise	GO:0048438	floral whorl development	377	7.2e-05	0.0079	TraesCS1B02G273300.1	0	0	0	0	0
pistillody-stamen	turquoise	GO:0048438	floral whorl development	377	7.2e-05	0.0079	TraesCS7A02G087700.1	0	0	1	0	0
pistillody-stamen	turquoise	GO:0048438	floral whorl development	377	7.2e-05	0.0079	TraesCS5A02G370200.1	0	0	0	0	0
pistillody-stamen	turquoise	GO:0048438	floral whorl development	377	7.2e-05	0.0079	TraesCS7D02G284100.1	0	0	0	0	0
pistillody-stamen	turquoise	GO:0048438	floral whorl development	377	7.2e-05	0.0079	TraesCS5B02G563900.2	0	0	1	0	0
pistillody-stamen	turquoise	GO:0048438	floral whorl development	377	7.2e-05	0.0079	TraesCS1D02G365100.1	0	0	0	0	0
pistillody-stamen	turquoise	GO:0048438	floral whorl development	377	7.2e-05	0.0079	TraesCS5A02G402800.1	0	0	0	0	0
pistillody-stamen	turquoise	GO:0048438	floral whorl development	377	7.2e-05	0.0079	TraesCS7D02G244000.1	0	0	1	0	0
pistillody-stamen	turquoise	GO:0048438	floral whorl development	377	7.2e-05	0.0079	TraesCS1D02G412300.1	0	0	0	0	0
pistillody-stamen	turquoise	GO:0048438	floral whorl development	377	7.2e-05	0.0079	TraesCS6B02G181300.1	0	0	0	0	0
pistillody-stamen	turquoise	GO:0048438	floral whorl development	377	7.2e-05	0.0079	TraesCS5A02G263600.1	0	0	0	0	0
pistillody-stamen	turquoise	GO:0048438	floral whorl development	377	7.2e-05	0.0079	TraesCS3B02G381400.1	0	0	0	0	0
pistillody-stamen	turquoise	GO:0048438	floral whorl development	377	7.2e-05	0.0079	TraesCS4A02G237600.1	0	0	0	0	0
pistillody-stamen	turquoise	GO:0048438	floral whorl development	377	7.2e-05	0.0079	TraesCS3D02G223700.1	0	0	0	0	0
pistillody-stamen	turquoise	GO:0048438	floral whorl development	377	7.2e-05	0.0079	TraesCS3B02G503100.1	0	0	0	0	0
pistillody-stamen	turquoise	GO:0048438	floral whorl development	377	7.2e-05	0.0079	TraesCS7A02G293300.3	0	0	0	0	0
pistillody-stamen	turquoise	GO:0048438	floral whorl development	377	7.2e-05	0.0079	TraesCS7D02G416400.1	0	0	1	0	0
pistillody-stamen	turquoise	GO:0048438	floral whorl development	377	7.2e-05	0.0079	TraesCS3A02G093000.1	0	0	0	0	0
pistillody-stamen	turquoise	GO:0048438	floral whorl development	377	7.2e-05	0.0079	TraesCS5B02G039200.1	0	0	0	0	0
pistillody-stamen	turquoise	GO:0048438	floral whorl development	377	7.2e-05	0.0079	TraesCS2D02G418800.1	0	0	0	0	0
pistillody-stamen	turquoise	GO:0048438	floral whorl development	377	7.2e-05	0.0079	TraesCS3D02G336200.1	0	0	0	0	0
pistillody-stamen	turquoise	GO:0048438	floral whorl development	377	7.2e-05	0.0079	TraesCS2A02G263100.1	0	0	0	0	0
pistillody-stamen	turquoise	GO:0048438	floral whorl development	377	7.2e-05	0.0079	TraesCS5D02G325400.2	0	0	0	0	0
pistillody-stamen	turquoise	GO:0048438	floral whorl development	377	7.2e-05	0.0079	TraesCS2D02G355900.1	0	0	0	0	0
pistillody-stamen	turquoise	GO:0048438	floral whorl development	377	7.2e-05	0.0079	TraesCS2B02G154100.1	0	0	0	0	0
pistillody-stamen	turquoise	GO:0048438	floral whorl development	377	7.2e-05	0.0079	TraesCS1D02G153700.1	0	0	0	0	0
pistillody-stamen	turquoise	GO:0048438	floral whorl development	377	7.2e-05	0.0079	TraesCS5B02G457600.1	0	0	0	0	0
pistillody-stamen	turquoise	GO:0048438	floral whorl development	377	7.2e-05	0.0079	TraesCS4B02G064000.1	0	0	0	0	0
pistillody-stamen	turquoise	GO:0048438	floral whorl development	377	7.2e-05	0.0079	TraesCS3D02G146900.1	0	0	0	0	0
pistillody-stamen	turquoise	GO:0048438	floral whorl development	377	7.2e-05	0.0079	TraesCS6B02G286400.2	0	0	0	0	0
pistillody-stamen	turquoise	GO:0048438	floral whorl development	377	7.2e-05	0.0079	TraesCS3D02G521900.1	0	0	0	0	0
pistillody-stamen	turquoise	GO:0048438	floral whorl development	377	7.2e-05	0.0079	TraesCS4D02G186200.1	0	0	0	0	0
pistillody-stamen	turquoise	GO:0048438	floral whorl development	377	7.2e-05	0.0079	TraesCS2A02G346000.1	0	0	0	0	0
pistillody-stamen	turquoise	GO:0048438	floral whorl development	377	7.2e-05	0.0079	TraesCS5B02G286100.2	0	0	0	0	0
pistillody-stamen	turquoise	GO:0048438	floral whorl development	377	7.2e-05	0.0079	TraesCS3A02G363900.1	0	0	0	0	0
pistillody-stamen	turquoise	GO:0048438	floral whorl development	377	7.2e-05	0.0079	TraesCS5B02G454200.1	0	0	0	0	0
pistillody-stamen	turquoise	GO:0048438	floral whorl development	377	7.2e-05	0.0079	TraesCS3D02G091000.2	0	0	0	0	0
pistillody-stamen	turquoise	GO:0048438	floral whorl development	377	7.2e-05	0.0079	TraesCS6A02G158100.1	0	0	0	0	0
pistillody-stamen	turquoise	GO:0048438	floral whorl development	377	7.2e-05	0.0079	TraesCS4A02G224800.1	0	0	0	0	0
pistillody-stamen	turquoise	GO:0048438	floral whorl development	377	7.2e-05	0.0079	TraesCS1A02G233800.1	0	0	1	0	0
pistillody-stamen	turquoise	GO:0048438	floral whorl development	377	7.2e-05	0.0079	TraesCS5B02G141600.2	0	0	0	0	0
pistillody-stamen	turquoise	GO:0048438	floral whorl development	377	7.2e-05	0.0079	TraesCS3A02G432500.1	0	0	0	0	0
pistillody-stamen	turquoise	GO:0048438	floral whorl development	377	7.2e-05	0.0079	TraesCS7A02G379000.1	0	0	0	0	0
pistillody-stamen	turquoise	GO:0048438	floral whorl development	377	7.2e-05	0.0079	TraesCS3B02G475600.1	0	0	1	0	0
pistillody-stamen	turquoise	GO:0048438	floral whorl development	377	7.2e-05	0.0079	TraesCS2A02G293600.1	0	0	0	0	0
pistillody-stamen	turquoise	GO:0048438	floral whorl development	377	7.2e-05	0.0079	TraesCS1D02G004900.1	0	0	0	0	0
pistillody-stamen	turquoise	GO:0048438	floral whorl development	377	7.2e-05	0.0079	TraesCS2B02G274800.1	0	0	0	0	0
pistillody-stamen	turquoise	GO:0048438	floral whorl development	377	7.2e-05	0.0079	TraesCS1D02G262500.1	0	0	1	0	0
pistillody-stamen	turquoise	GO:0048438	floral whorl development	377	7.2e-05	0.0079	TraesCS5D02G294400.1	0	0	0	0	0
pistillody-stamen	turquoise	GO:0048438	floral whorl development	377	7.2e-05	0.0079	TraesCS3B02G543300.1	0	0	1	0	0
pistillody-stamen	turquoise	GO:0048438	floral whorl development	377	7.2e-05	0.0079	TraesCS1A02G113600.1	0	0	0	0	0
pistillody-stamen	turquoise	GO:0048438	floral whorl development	377	7.2e-05	0.0079	TraesCS3A02G000300.1	0	0	0	0	0
pistillody-stamen	turquoise	GO:0048438	floral whorl development	377	7.2e-05	0.0079	TraesCS4A02G386600.1	0	0	0	0	0
pistillody-stamen	turquoise	GO:0048438	floral whorl development	377	7.2e-05	0.0079	TraesCS3A02G148400.1	0	0	0	0	0
pistillody-stamen	turquoise	GO:0048438	floral whorl development	377	7.2e-05	0.0079	TraesCS3A02G495400.1	0	0	1	0	0
pistillody-stamen	turquoise	GO:0048438	floral whorl development	377	7.2e-05	0.0079	TraesCS1A02G002700.1	0	0	0	0	0
pistillody-stamen	turquoise	GO:0048438	floral whorl development	377	7.2e-05	0.0079	TraesCS2B02G497500.1	0	0	1	0	0
pistillody-stamen	turquoise	GO:0048438	floral whorl development	377	7.2e-05	0.0079	TraesCS6A02G222300.1	0	0	0	0	0
pistillody-stamen	turquoise	GO:0048438	floral whorl development	377	7.2e-05	0.0079	TraesCS3A02G144000.1	0	0	0	0	0
pistillody-stamen	turquoise	GO:0048438	floral whorl development	377	7.2e-05	0.0079	TraesCS5B02G457300.1	0	0	0	0	0
pistillody-stamen	turquoise	GO:0048438	floral whorl development	377	7.2e-05	0.0079	TraesCS4A02G213000.5	0	0	0	0	0
pistillody-stamen	turquoise	GO:0048438	floral whorl development	377	7.2e-05	0.0079	TraesCS2D02G133800.1	0	0	0	0	0
pistillody-stamen	turquoise	GO:0048438	floral whorl development	377	7.2e-05	0.0079	TraesCS6D02G122400.1	0	0	0	0	0
pistillody-stamen	turquoise	GO:0048438	floral whorl development	377	7.2e-05	0.0079	TraesCS2A02G521400.2	0	0	0	0	0
pistillody-stamen	turquoise	GO:0048438	floral whorl development	377	7.2e-05	0.0079	TraesCS7D02G376400.1	0	0	0	0	0
pistillody-stamen	turquoise	GO:0048438	floral whorl development	377	7.2e-05	0.0079	TraesCS5D02G501400.1	0	0	1	0	0
pistillody-stamen	turquoise	GO:0048438	floral whorl development	377	7.2e-05	0.0079	TraesCS2D02G290600.2	0	0	0	0	0
pistillody-stamen	turquoise	GO:0048438	floral whorl development	377	7.2e-05	0.0079	TraesCS5D02G400100.2	0	0	0	0	0
pistillody-stamen	turquoise	GO:0048438	floral whorl development	377	7.2e-05	0.0079	TraesCS3B02G475800.1	0	0	0	0	0
pistillody-stamen	turquoise	GO:0048438	floral whorl development	377	7.2e-05	0.0079	TraesCS6D02G142900.1	0	0	0	0	0
pistillody-stamen	turquoise	GO:0048438	floral whorl development	377	7.2e-05	0.0079	TraesCS7B02G146100.1	0	0	1	0	0
pistillody-stamen	turquoise	GO:0048438	floral whorl development	377	7.2e-05	0.0079	TraesCS1D02G353700.1	0	0	0	0	0
pistillody-stamen	turquoise	GO:0048438	floral whorl development	377	7.2e-05	0.0079	TraesCS3A02G342300.1	0	0	0	0	0
pistillody-stamen	turquoise	GO:0048438	floral whorl development	377	7.2e-05	0.0079	TraesCS3B02G499800.1	0	0	0	0	0
pistillody-stamen	turquoise	GO:0048438	floral whorl development	377	7.2e-05	0.0079	TraesCS2D02G410700.1	0	0	0	0	0
pistillody-stamen	turquoise	GO:0048438	floral whorl development	377	7.2e-05	0.0079	TraesCS2A02G397200.1	0	0	1	0	0
pistillody-stamen	turquoise	GO:0048438	floral whorl development	377	7.2e-05	0.0079	TraesCS5A02G491400.1	0	0	0	0	0
pistillody-stamen	turquoise	GO:0048438	floral whorl development	377	7.2e-05	0.0079	TraesCS3D02G343100.1	0	0	1	0	0
pistillody-stamen	turquoise	GO:0048438	floral whorl development	377	7.2e-05	0.0079	TraesCS7D02G267500.1	0	0	0	0	0
pistillody-stamen	turquoise	GO:0048438	floral whorl development	377	7.2e-05	0.0079	TraesCS6D02G287800.1	0	0	0	0	0
pistillody-stamen	turquoise	GO:0048438	floral whorl development	377	7.2e-05	0.0079	TraesCS2B02G250900.1	0	0	0	0	0
pistillody-stamen	turquoise	GO:0048438	floral whorl development	377	7.2e-05	0.0079	TraesCS4B02G049800.1	0	0	0	0	0
pistillody-stamen	turquoise	GO:0048438	floral whorl development	377	7.2e-05	0.0079	TraesCS3B02G468400.1	0	0	1	0	0
pistillody-stamen	turquoise	GO:0048438	floral whorl development	377	7.2e-05	0.0079	TraesCS2D02G505400.1	0	0	0	0	0
pistillody-stamen	turquoise	GO:0048438	floral whorl development	377	7.2e-05	0.0079	TraesCS1A02G150900.1	0	0	0	0	0
pistillody-stamen	turquoise	GO:0048438	floral whorl development	377	7.2e-05	0.0079	TraesCS3A02G421400.1	0	0	0	0	0
pistillody-stamen	turquoise	GO:0048438	floral whorl development	377	7.2e-05	0.0079	TraesCS1B02G058600.1	0	0	0	0	0
pistillody-stamen	turquoise	GO:0048438	floral whorl development	377	7.2e-05	0.0079	TraesCS1B02G084500.1	0	0	1	0	0
pistillody-stamen	turquoise	GO:0048438	floral whorl development	377	7.2e-05	0.0079	TraesCS3B02G005900.1	0	0	0	0	0
pistillody-stamen	turquoise	GO:0048438	floral whorl development	377	7.2e-05	0.0079	TraesCS2B02G309300.2	0	0	0	0	0
pistillody-stamen	turquoise	GO:0048438	floral whorl development	377	7.2e-05	0.0079	TraesCS1B02G309800.1	0	0	0	0	0
pistillody-stamen	turquoise	GO:0048438	floral whorl development	377	7.2e-05	0.0079	TraesCS3A02G442000.1	0	0	0	0	0
pistillody-stamen	turquoise	GO:0048438	floral whorl development	377	7.2e-05	0.0079	TraesCS6A02G309600.1	0	0	0	0	0
pistillody-stamen	turquoise	GO:0048438	floral whorl development	377	7.2e-05	0.0079	TraesCS5B02G373300.3	0	0	0	0	0
pistillody-stamen	turquoise	GO:0048438	floral whorl development	377	7.2e-05	0.0079	TraesCS5A02G177300.1	0	0	0	0	0
pistillody-stamen	turquoise	GO:0048438	floral whorl development	377	7.2e-05	0.0079	TraesCS3B02G164500.1	0	0	1	0	0
pistillody-stamen	turquoise	GO:0048438	floral whorl development	377	7.2e-05	0.0079	TraesCS2A02G504700.1	0	0	0	0	0
pistillody-stamen	turquoise	GO:0048438	floral whorl development	377	7.2e-05	0.0079	TraesCS5A02G155100.1	0	0	0	0	0
pistillody-stamen	turquoise	GO:0048438	floral whorl development	377	7.2e-05	0.0079	TraesCS3B02G175300.1	0	0	0	0	0
pistillody-stamen	turquoise	GO:0048438	floral whorl development	377	7.2e-05	0.0079	TraesCS5D02G217700.1	0	0	0	0	0
pistillody-stamen	turquoise	GO:0048438	floral whorl development	377	7.2e-05	0.0079	TraesCS3B02G486000.1	0	0	0	0	0
pistillody-stamen	turquoise	GO:0048438	floral whorl development	377	7.2e-05	0.0079	TraesCS3B02G236500.1	0	0	0	0	0
pistillody-stamen	turquoise	GO:0048438	floral whorl development	377	7.2e-05	0.0079	TraesCS4A02G422700.1	0	0	0	0	0
pistillody-stamen	turquoise	GO:0048438	floral whorl development	377	7.2e-05	0.0079	TraesCS7A02G284900.2	0	0	1	0	0
pistillody-stamen	turquoise	GO:0048438	floral whorl development	377	7.2e-05	0.0079	TraesCS3D02G054400.1	0	0	0	0	0
pistillody-stamen	turquoise	GO:0048438	floral whorl development	377	7.2e-05	0.0079	TraesCS1B02G377100.1	0	0	0	0	0
pistillody-stamen	turquoise	GO:0048438	floral whorl development	377	7.2e-05	0.0079	TraesCS7D02G363200.1	0	0	0	0	0
pistillody-stamen	turquoise	GO:0048438	floral whorl development	377	7.2e-05	0.0079	TraesCS1A02G301800.2	0	0	0	0	0
pistillody-stamen	turquoise	GO:0048438	floral whorl development	377	7.2e-05	0.0079	TraesCS7D02G263400.1	0	0	0	0	0
pistillody-stamen	turquoise	GO:0048438	floral whorl development	377	7.2e-05	0.0079	TraesCS2B02G258400.2	0	0	0	0	0
pistillody-stamen	turquoise	GO:0048438	floral whorl development	377	7.2e-05	0.0079	TraesCS3D02G008800.1	0	0	0	0	0
pistillody-stamen	turquoise	GO:0048438	floral whorl development	377	7.2e-05	0.0079	TraesCS1A02G227300.1	0	0	0	0	0
pistillody-stamen	turquoise	GO:0048438	floral whorl development	377	7.2e-05	0.0079	TraesCS2A02G104100.1	0	0	0	0	0
pistillody-stamen	turquoise	GO:0048438	floral whorl development	377	7.2e-05	0.0079	TraesCS5B02G207400.1	0	0	0	0	0
pistillody-stamen	turquoise	GO:0048438	floral whorl development	377	7.2e-05	0.0079	TraesCS7B02G152800.1	0	0	0	0	0
pistillody-stamen	turquoise	GO:0048438	floral whorl development	377	7.2e-05	0.0079	TraesCS3D02G192400.1	0	0	0	0	0
pistillody-stamen	turquoise	GO:0048438	floral whorl development	377	7.2e-05	0.0079	TraesCS7A02G529600.1	0	0	0	0	0
pistillody-stamen	turquoise	GO:0048438	floral whorl development	377	7.2e-05	0.0079	TraesCS7B02G468100.3	0	0	0	0	0
pistillody-stamen	turquoise	GO:0048438	floral whorl development	377	7.2e-05	0.0079	TraesCS2A02G413900.1	0	0	0	0	0
pistillody-stamen	turquoise	GO:0048438	floral whorl development	377	7.2e-05	0.0079	TraesCS5A02G533800.3	0	0	0	0	0
pistillody-stamen	turquoise	GO:0048438	floral whorl development	377	7.2e-05	0.0079	TraesCS3B02G476000.1	0	0	1	0	0
pistillody-stamen	turquoise	GO:0048438	floral whorl development	377	7.2e-05	0.0079	TraesCS2D02G199900.1	0	0	1	0	0
pistillody-stamen	turquoise	GO:0048438	floral whorl development	377	7.2e-05	0.0079	TraesCS7B02G324500.1	0	0	0	0	0
pistillody-stamen	turquoise	GO:0048438	floral whorl development	377	7.2e-05	0.0079	TraesCS7A02G478100.1	0	0	0	0	0
pistillody-stamen	turquoise	GO:0048438	floral whorl development	377	7.2e-05	0.0079	TraesCS7A02G256200.1	0	0	0	0	0
pistillody-stamen	turquoise	GO:0048438	floral whorl development	377	7.2e-05	0.0079	TraesCS4A02G016600.1	0	0	1	0	0
pistillody-stamen	turquoise	GO:0048438	floral whorl development	377	7.2e-05	0.0079	TraesCS6A02G259000.1	0	0	0	0	0
pistillody-stamen	turquoise	GO:0048438	floral whorl development	377	7.2e-05	0.0079	TraesCS7D02G338800.1	0	0	0	0	0
pistillody-stamen	turquoise	GO:0048438	floral whorl development	377	7.2e-05	0.0079	TraesCS7D02G271400.1	0	0	0	0	0
pistillody-stamen	turquoise	GO:0048438	floral whorl development	377	7.2e-05	0.0079	TraesCS3D02G357400.1	0	0	0	0	0
pistillody-stamen	turquoise	GO:0048438	floral whorl development	377	7.2e-05	0.0079	TraesCS4B02G234600.1	0	0	0	0	0
pistillody-stamen	turquoise	GO:0048438	floral whorl development	377	7.2e-05	0.0079	TraesCS1A02G103100.1	0	0	0	0	0
pistillody-stamen	turquoise	GO:0048438	floral whorl development	377	7.2e-05	0.0079	TraesCS7A02G245400.1	0	0	0	0	0
pistillody-stamen	turquoise	GO:0048438	floral whorl development	377	7.2e-05	0.0079	TraesCS3A02G441700.1	0	0	1	0	0
pistillody-stamen	turquoise	GO:0048438	floral whorl development	377	7.2e-05	0.0079	TraesCS2A02G224600.1	0	0	0	0	0
pistillody-stamen	turquoise	GO:0048438	floral whorl development	377	7.2e-05	0.0079	TraesCS7B02G437100.1	0	0	0	0	0
pistillody-stamen	turquoise	GO:0048438	floral whorl development	377	7.2e-05	0.0079	TraesCS1D02G354500.2	0	0	1	0	0
pistillody-stamen	turquoise	GO:0048438	floral whorl development	377	7.2e-05	0.0079	TraesCS3A02G536300.1	0	0	0	0	0
pistillody-stamen	turquoise	GO:0048438	floral whorl development	377	7.2e-05	0.0079	TraesCS5B02G382300.1	0	0	0	0	0
pistillody-stamen	turquoise	GO:0048438	floral whorl development	377	7.2e-05	0.0079	TraesCS3D02G434700.1	0	0	0	0	0
pistillody-stamen	turquoise	GO:0048438	floral whorl development	377	7.2e-05	0.0079	TraesCS4B02G029100.1	0	0	0	0	0
pistillody-stamen	turquoise	GO:0048438	floral whorl development	377	7.2e-05	0.0079	TraesCS6D02G248300.1	0	0	0	0	0
pistillody-stamen	turquoise	GO:0048438	floral whorl development	377	7.2e-05	0.0079	TraesCS3B02G336100.1	0	0	0	0	0
pistillody-stamen	turquoise	GO:0048438	floral whorl development	377	7.2e-05	0.0079	TraesCS1B02G144800.3	0	0	0	0	0
pistillody-stamen	turquoise	GO:0048438	floral whorl development	377	7.2e-05	0.0079	TraesCS4A02G430600.1	0	0	1	0	0
pistillody-stamen	turquoise	GO:0048438	floral whorl development	377	7.2e-05	0.0079	TraesCS3B02G086700.1	0	0	0	0	0
pistillody-stamen	turquoise	GO:0048438	floral whorl development	377	7.2e-05	0.0079	TraesCS1B02G273000.2	0	0	1	0	0
pistillody-stamen	turquoise	GO:0048438	floral whorl development	377	7.2e-05	0.0079	TraesCS7D02G168700.1	0	0	0	0	0
pistillody-stamen	turquoise	GO:0048438	floral whorl development	377	7.2e-05	0.0079	TraesCS3D02G425800.1	0	0	1	0	0
pistillody-stamen	turquoise	GO:0048438	floral whorl development	377	7.2e-05	0.0079	TraesCS7B02G169200.1	0	0	0	0	0
pistillody-stamen	turquoise	GO:0048438	floral whorl development	377	7.2e-05	0.0079	TraesCS3D02G156100.1	0	0	0	0	0
pistillody-stamen	turquoise	GO:0048438	floral whorl development	377	7.2e-05	0.0079	TraesCS1B02G270400.1	0	0	0	0	0
pistillody-stamen	turquoise	GO:0048438	floral whorl development	377	7.2e-05	0.0079	TraesCS1D02G337400.1	0	0	0	0	0
pistillody-stamen	turquoise	GO:0048438	floral whorl development	377	7.2e-05	0.0079	TraesCS4D02G101500.1	0	0	0	0	0
pistillody-stamen	turquoise	GO:0048438	floral whorl development	377	7.2e-05	0.0079	TraesCS4D02G117300.1	0	0	0	0	0
pistillody-stamen	turquoise	GO:0048438	floral whorl development	377	7.2e-05	0.0079	TraesCS2B02G277900.1	0	0	0	0	0
pistillody-stamen	turquoise	GO:0048438	floral whorl development	377	7.2e-05	0.0079	TraesCS3A02G072600.1	0	0	0	0	0
pistillody-stamen	turquoise	GO:0048438	floral whorl development	377	7.2e-05	0.0079	TraesCS2A02G268300.1	0	0	0	0	0
pistillody-stamen	turquoise	GO:0048438	floral whorl development	377	7.2e-05	0.0079	TraesCS7A02G083800.1	0	0	0	0	0
pistillody-stamen	turquoise	GO:0048438	floral whorl development	377	7.2e-05	0.0079	TraesCS1D02G370800.1	0	0	0	0	0
pistillody-stamen	turquoise	GO:0048438	floral whorl development	377	7.2e-05	0.0079	TraesCS3D02G093300.1	0	0	0	0	0
pistillody-stamen	turquoise	GO:0048438	floral whorl development	377	7.2e-05	0.0079	TraesCS3D02G072300.1	0	0	0	0	0
pistillody-stamen	turquoise	GO:0048438	floral whorl development	377	7.2e-05	0.0079	TraesCS7D02G400000.1	0	0	0	0	0
pistillody-stamen	turquoise	GO:0048438	floral whorl development	377	7.2e-05	0.0079	TraesCS1A02G262400.1	0	0	0	0	0
pistillody-stamen	turquoise	GO:0048438	floral whorl development	377	7.2e-05	0.0079	TraesCS3B02G040200.1	0	0	0	0	0
pistillody-stamen	turquoise	GO:0048438	floral whorl development	377	7.2e-05	0.0079	TraesCS7D02G305200.2	0	0	1	0	0
pistillody-stamen	turquoise	GO:0048438	floral whorl development	377	7.2e-05	0.0079	TraesCS7D02G478800.1	0	0	0	0	0
pistillody-stamen	turquoise	GO:0048438	floral whorl development	377	7.2e-05	0.0079	TraesCS4A02G058800.1	0	0	0	0	0
pistillody-stamen	turquoise	GO:0048438	floral whorl development	377	7.2e-05	0.0079	TraesCS3A02G349200.1	0	0	1	0	0
pistillody-stamen	turquoise	GO:0048438	floral whorl development	377	7.2e-05	0.0079	TraesCS3A02G402300.1	0	0	0	0	0
pistillody-stamen	turquoise	GO:0048438	floral whorl development	377	7.2e-05	0.0079	TraesCS3A02G229500.1	0	0	0	0	0
pistillody-stamen	turquoise	GO:0048438	floral whorl development	377	7.2e-05	0.0079	TraesCS2B02G415500.1	0	0	1	0	0
pistillody-stamen	turquoise	GO:0048438	floral whorl development	377	7.2e-05	0.0079	TraesCS1A02G360700.2	0	0	0	0	0
pistillody-stamen	turquoise	GO:0048438	floral whorl development	377	7.2e-05	0.0079	TraesCS3B02G503300.2	0	0	0	0	0
pistillody-stamen	turquoise	GO:0048438	floral whorl development	377	7.2e-05	0.0079	TraesCS4A02G059000.1	0	0	1	0	0
pistillody-stamen	turquoise	GO:0048438	floral whorl development	377	7.2e-05	0.0079	TraesCS1D02G228900.1	0	0	0	0	0
pistillody-stamen	turquoise	GO:0048438	floral whorl development	377	7.2e-05	0.0079	TraesCS1D02G268400.1	0	0	0	0	0
pistillody-stamen	turquoise	GO:0048438	floral whorl development	377	7.2e-05	0.0079	TraesCS5A02G286800.1	0	0	0	0	0
pistillody-stamen	turquoise	GO:0048438	floral whorl development	377	7.2e-05	0.0079	TraesCS2A02G330000.1	0	0	0	0	0
pistillody-stamen	turquoise	GO:0048438	floral whorl development	377	7.2e-05	0.0079	TraesCS5A02G319200.1	0	0	0	0	0
pistillody-stamen	turquoise	GO:0048438	floral whorl development	377	7.2e-05	0.0079	TraesCS7D02G291200.3	0	0	1	0	0
pistillody-stamen	turquoise	GO:0048438	floral whorl development	377	7.2e-05	0.0079	TraesCS6A02G163400.1	0	0	0	0	0
pistillody-stamen	turquoise	GO:0048438	floral whorl development	377	7.2e-05	0.0079	TraesCS7A02G459400.1	0	0	0	0	0
pistillody-stamen	turquoise	GO:0048438	floral whorl development	377	7.2e-05	0.0079	TraesCS3B02G315900.1	0	0	0	0	0
pistillody-stamen	turquoise	GO:0048438	floral whorl development	377	7.2e-05	0.0079	TraesCS7D02G313000.1	0	0	1	0	0
pistillody-stamen	turquoise	GO:0048438	floral whorl development	377	7.2e-05	0.0079	TraesCS7D02G053600.1	0	0	0	0	0
pistillody-stamen	turquoise	GO:0048438	floral whorl development	377	7.2e-05	0.0079	TraesCS3D02G072400.1	0	0	1	0	0
pistillody-stamen	turquoise	GO:0048438	floral whorl development	377	7.2e-05	0.0079	TraesCS7A02G476700.1	0	0	0	0	0
pistillody-stamen	turquoise	GO:0048438	floral whorl development	377	7.2e-05	0.0079	TraesCS7D02G060400.1	0	0	0	0	0
pistillody-stamen	turquoise	GO:0048438	floral whorl development	377	7.2e-05	0.0079	TraesCS7B02G267900.1	0	0	1	0	0
pistillody-stamen	turquoise	GO:0048438	floral whorl development	377	7.2e-05	0.0079	TraesCS6A02G191200.1	0	0	0	0	0
pistillody-stamen	turquoise	GO:0048438	floral whorl development	377	7.2e-05	0.0079	TraesCS6B02G337300.1	0	0	0	0	0
pistillody-stamen	turquoise	GO:0048438	floral whorl development	377	7.2e-05	0.0079	TraesCS3B02G162500.2	0	0	0	0	0
pistillody-stamen	turquoise	GO:0048438	floral whorl development	377	7.2e-05	0.0079	TraesCS2A02G357100.1	0	0	0	0	0
pistillody-stamen	turquoise	GO:0048438	floral whorl development	377	7.2e-05	0.0079	TraesCS1D02G127700.1	0	0	0	0	0
pistillody-stamen	turquoise	GO:0048438	floral whorl development	377	7.2e-05	0.0079	TraesCS5D02G149200.1	0	0	0	0	0
pistillody-stamen	turquoise	GO:0048438	floral whorl development	377	7.2e-05	0.0079	TraesCS2D02G516300.2	0	0	0	0	0
pistillody-stamen	turquoise	GO:0048438	floral whorl development	377	7.2e-05	0.0079	TraesCS7A02G066200.1	0	0	0	0	0
pistillody-stamen	turquoise	GO:0048438	floral whorl development	377	7.2e-05	0.0079	TraesCS3B02G501600.1	0	0	0	0	0
pistillody-stamen	turquoise	GO:0048438	floral whorl development	377	7.2e-05	0.0079	TraesCS6D02G304300.1	0	0	1	0	0
pistillody-stamen	turquoise	GO:0048438	floral whorl development	377	7.2e-05	0.0079	TraesCS2B02G121100.1	0	0	0	0	0
pistillody-stamen	turquoise	GO:0048438	floral whorl development	377	7.2e-05	0.0079	TraesCS5D02G044800.1	0	0	0	0	0
pistillody-stamen	turquoise	GO:0048438	floral whorl development	377	7.2e-05	0.0079	TraesCS1B02G241400.1	0	0	0	0	0
pistillody-stamen	turquoise	GO:0048438	floral whorl development	377	7.2e-05	0.0079	TraesCS6D02G289000.1	0	0	0	0	0
pistillody-stamen	turquoise	GO:0048438	floral whorl development	377	7.2e-05	0.0079	TraesCS2D02G263500.1	0	0	0	0	0
pistillody-stamen	turquoise	GO:0048438	floral whorl development	377	7.2e-05	0.0079	TraesCS6B02G235800.1	0	0	0	0	0
pistillody-stamen	turquoise	GO:0048438	floral whorl development	377	7.2e-05	0.0079	TraesCS4D02G339400.1	0	0	0	0	0
pistillody-stamen	turquoise	GO:0048438	floral whorl development	377	7.2e-05	0.0079	TraesCS1D02G262700.1	0	0	0	0	0
pistillody-stamen	turquoise	GO:0048833	specification of floral organ number	10	0.00032	0.03	TraesCS2D02G207200.1	0	0	0	0	0
pistillody-stamen	turquoise	GO:0048833	specification of floral organ number	10	0.00032	0.03	TraesCS2B02G226900.1	0	0	0	0	0
pistillody-stamen	turquoise	GO:0048833	specification of floral organ number	10	0.00032	0.03	TraesCS2A02G199600.1	0	0	0	0	0
pistillody-stamen	turquoise	GO:0048833	specification of floral organ number	10	0.00032	0.03	TraesCS1D02G153700.1	0	0	0	0	0
pistillody-stamen	turquoise	GO:0048833	specification of floral organ number	10	0.00032	0.03	TraesCS6B02G286400.2	0	0	0	0	0
pistillody-stamen	turquoise	GO:0048833	specification of floral organ number	10	0.00032	0.03	TraesCS5B02G286100.2	0	0	0	0	0
pistillody-stamen	turquoise	GO:0048833	specification of floral organ number	10	0.00032	0.03	TraesCS6D02G240200.2	0	0	0	0	0
pistillody-stamen	turquoise	GO:0048833	specification of floral organ number	10	0.00032	0.03	TraesCS5A02G286800.1	0	0	0	0	0
pistillody-stamen	turquoise	GO:0048833	specification of floral organ number	10	0.00032	0.03	TraesCS5D02G294500.1	0	0	0	0	0
pistillody-stamen	turquoise	GO:0048833	specification of floral organ number	10	0.00032	0.03	TraesCS6A02G259000.1	0	0	0	0	0
pistillody-stamen	turquoise	GO:0048464	flower calyx development	33	9.5e-05	0.01	TraesCS5A02G118700.2	0	0	0	0	0
pistillody-stamen	turquoise	GO:0048464	flower calyx development	33	9.5e-05	0.01	TraesCS3A02G000300.1	0	0	0	0	0
pistillody-stamen	turquoise	GO:0048464	flower calyx development	33	9.5e-05	0.01	TraesCS7B02G072700.1	0	0	0	0	0
pistillody-stamen	turquoise	GO:0048464	flower calyx development	33	9.5e-05	0.01	TraesCS1D02G354500.2	0	0	1	0	0
pistillody-stamen	turquoise	GO:0048464	flower calyx development	33	9.5e-05	0.01	TraesCS5B02G286100.2	0	0	0	0	0
pistillody-stamen	turquoise	GO:0048464	flower calyx development	33	9.5e-05	0.01	TraesCS3D02G008800.1	0	0	0	0	0
pistillody-stamen	turquoise	GO:0048464	flower calyx development	33	9.5e-05	0.01	TraesCS6A02G222300.1	0	0	0	0	0
pistillody-stamen	turquoise	GO:0048464	flower calyx development	33	9.5e-05	0.01	TraesCS2D02G133800.1	0	0	0	0	0
pistillody-stamen	turquoise	GO:0048464	flower calyx development	33	9.5e-05	0.01	TraesCS6B02G354900.1	0	0	1	0	0
pistillody-stamen	turquoise	GO:0048464	flower calyx development	33	9.5e-05	0.01	TraesCS3D02G192400.1	0	0	0	0	0
pistillody-stamen	turquoise	GO:0048464	flower calyx development	33	9.5e-05	0.01	TraesCS6A02G324500.1	0	0	1	0	0
pistillody-stamen	turquoise	GO:0048464	flower calyx development	33	9.5e-05	0.01	TraesCS4A02G430600.1	0	0	1	0	0
pistillody-stamen	turquoise	GO:0048464	flower calyx development	33	9.5e-05	0.01	TraesCS6D02G304300.1	0	0	1	0	0
pistillody-stamen	turquoise	GO:0048464	flower calyx development	33	9.5e-05	0.01	TraesCS7A02G167900.1	0	0	0	0	0
pistillody-stamen	turquoise	GO:0048464	flower calyx development	33	9.5e-05	0.01	TraesCS4B02G137400.1	0	0	0	0	0
pistillody-stamen	turquoise	GO:0048464	flower calyx development	33	9.5e-05	0.01	TraesCS4A02G237600.1	0	0	0	0	0
pistillody-stamen	turquoise	GO:0048464	flower calyx development	33	9.5e-05	0.01	TraesCS3B02G003800.1	0	0	0	0	0
pistillody-stamen	turquoise	GO:0048464	flower calyx development	33	9.5e-05	0.01	TraesCS7B02G468100.3	0	0	0	0	0
pistillody-stamen	turquoise	GO:0048464	flower calyx development	33	9.5e-05	0.01	TraesCS2A02G478800.1	0	0	0	0	0
pistillody-stamen	turquoise	GO:0048464	flower calyx development	33	9.5e-05	0.01	TraesCS7D02G168700.1	0	0	0	0	0
pistillody-stamen	turquoise	GO:0048464	flower calyx development	33	9.5e-05	0.01	TraesCS6B02G151900.1	0	0	1	0	0
pistillody-stamen	turquoise	GO:0048464	flower calyx development	33	9.5e-05	0.01	TraesCS7A02G544700.2	0	0	0	0	0
pistillody-stamen	turquoise	GO:0048464	flower calyx development	33	9.5e-05	0.01	TraesCS5A02G286800.1	0	0	0	0	0
pistillody-stamen	turquoise	GO:0048464	flower calyx development	33	9.5e-05	0.01	TraesCS5B02G159900.5	0	0	0	0	0
pistillody-stamen	turquoise	GO:0048464	flower calyx development	33	9.5e-05	0.01	TraesCS2D02G516300.2	0	0	0	0	0
pistillody-stamen	turquoise	GO:0048464	flower calyx development	33	9.5e-05	0.01	TraesCS7A02G059000.1	0	0	0	0	0
pistillody-stamen	turquoise	GO:0048464	flower calyx development	33	9.5e-05	0.01	TraesCS4A02G180100.1	0	0	0	0	0
pistillody-stamen	turquoise	GO:0048464	flower calyx development	33	9.5e-05	0.01	TraesCS2B02G154100.1	0	0	0	0	0
pistillody-stamen	turquoise	GO:0048464	flower calyx development	33	9.5e-05	0.01	TraesCS5D02G040800.1	0	0	0	0	0
pistillody-stamen	turquoise	GO:0048464	flower calyx development	33	9.5e-05	0.01	TraesCS4D02G132100.1	0	0	0	0	0
pistillody-stamen	turquoise	GO:0048464	flower calyx development	33	9.5e-05	0.01	TraesCS7D02G053600.1	0	0	0	0	0
pistillody-stamen	turquoise	GO:0048464	flower calyx development	33	9.5e-05	0.01	TraesCS5D02G294500.1	0	0	0	0	0
pistillody-stamen	turquoise	GO:0048464	flower calyx development	33	9.5e-05	0.01	TraesCS4D02G125300.1	0	0	0	0	0
pistillody-stamen	turquoise	GO:0009908	flower development	645	0.00012	0.012	TraesCS3B02G068100.1	0	0	0	0	0
pistillody-stamen	turquoise	GO:0009908	flower development	645	0.00012	0.012	TraesCS5D02G484800.1	0	0	0	0	0
pistillody-stamen	turquoise	GO:0009908	flower development	645	0.00012	0.012	TraesCS6A02G308600.1	0	0	0	0	0
pistillody-stamen	turquoise	GO:0009908	flower development	645	0.00012	0.012	TraesCS1D02G353700.1	0	0	0	0	0
pistillody-stamen	turquoise	GO:0009908	flower development	645	0.00012	0.012	TraesCS2B02G138400.1	0	0	0	0	0
pistillody-stamen	turquoise	GO:0009908	flower development	645	0.00012	0.012	TraesCS7B02G137600.1	0	0	0	0	0
pistillody-stamen	turquoise	GO:0009908	flower development	645	0.00012	0.012	TraesCS4D02G099400.1	0	0	0	0	0
pistillody-stamen	turquoise	GO:0009908	flower development	645	0.00012	0.012	TraesCS2D02G054600.1	0	0	0	0	0
pistillody-stamen	turquoise	GO:0009908	flower development	645	0.00012	0.012	TraesCS2B02G222700.1	0	0	0	0	0
pistillody-stamen	turquoise	GO:0009908	flower development	645	0.00012	0.012	TraesCS5B02G177300.3	0	0	0	0	0
pistillody-stamen	turquoise	GO:0009908	flower development	645	0.00012	0.012	TraesCS6A02G138600.4	0	0	0	0	0
pistillody-stamen	turquoise	GO:0009908	flower development	645	0.00012	0.012	TraesCS5A02G494500.1	0	0	1	0	0
pistillody-stamen	turquoise	GO:0009908	flower development	645	0.00012	0.012	TraesCS3B02G374400.1	0	0	0	0	0
pistillody-stamen	turquoise	GO:0009908	flower development	645	0.00012	0.012	TraesCS3B02G003800.1	0	0	0	0	0
pistillody-stamen	turquoise	GO:0009908	flower development	645	0.00012	0.012	TraesCS2A02G232400.1	0	0	0	0	0
pistillody-stamen	turquoise	GO:0009908	flower development	645	0.00012	0.012	TraesCS1B02G114500.1	0	0	0	0	0
pistillody-stamen	turquoise	GO:0009908	flower development	645	0.00012	0.012	TraesCS5B02G115100.1	0	0	0	0	0
pistillody-stamen	turquoise	GO:0009908	flower development	645	0.00012	0.012	TraesCS3B02G493200.1	0	0	0	0	0
pistillody-stamen	turquoise	GO:0009908	flower development	645	0.00012	0.012	TraesCS7D02G206700.2	0	0	0	0	0
pistillody-stamen	turquoise	GO:0009908	flower development	645	0.00012	0.012	TraesCS4A02G133800.1	0	0	0	0	0
pistillody-stamen	turquoise	GO:0009908	flower development	645	0.00012	0.012	TraesCS3A02G282300.1	0	0	0	0	0
pistillody-stamen	turquoise	GO:0009908	flower development	645	0.00012	0.012	TraesCS6B02G151900.1	0	0	1	0	0
pistillody-stamen	turquoise	GO:0009908	flower development	645	0.00012	0.012	TraesCS7A02G550200.1	0	0	0	0	0
pistillody-stamen	turquoise	GO:0009908	flower development	645	0.00012	0.012	TraesCS3B02G502600.1	0	0	0	0	0
pistillody-stamen	turquoise	GO:0009908	flower development	645	0.00012	0.012	TraesCS5B02G086900.1	0	0	0	0	0
pistillody-stamen	turquoise	GO:0009908	flower development	645	0.00012	0.012	TraesCS7A02G492400.1	0	0	0	0	0
pistillody-stamen	turquoise	GO:0009908	flower development	645	0.00012	0.012	TraesCS7A02G544700.2	0	0	0	0	0
pistillody-stamen	turquoise	GO:0009908	flower development	645	0.00012	0.012	TraesCS3D02G360400.2	0	0	0	0	0
pistillody-stamen	turquoise	GO:0009908	flower development	645	0.00012	0.012	TraesCS7A02G538600.2	0	0	0	0	0
pistillody-stamen	turquoise	GO:0009908	flower development	645	0.00012	0.012	TraesCS1A02G225100.1	0	0	0	0	0
pistillody-stamen	turquoise	GO:0009908	flower development	645	0.00012	0.012	TraesCS5A02G232700.1	0	0	0	0	0
pistillody-stamen	turquoise	GO:0009908	flower development	645	0.00012	0.012	TraesCS5A02G513200.1	0	0	0	0	0
pistillody-stamen	turquoise	GO:0009908	flower development	645	0.00012	0.012	TraesCS4A02G275900.1	0	0	0	0	0
pistillody-stamen	turquoise	GO:0009908	flower development	645	0.00012	0.012	TraesCS4D02G125300.1	0	0	0	0	0
pistillody-stamen	turquoise	GO:0009908	flower development	645	0.00012	0.012	TraesCS5A02G118700.2	0	0	0	0	0
pistillody-stamen	turquoise	GO:0009908	flower development	645	0.00012	0.012	TraesCS1A02G315200.1	0	0	0	0	0
pistillody-stamen	turquoise	GO:0009908	flower development	645	0.00012	0.012	TraesCS7B02G303300.1	0	0	0	0	0
pistillody-stamen	turquoise	GO:0009908	flower development	645	0.00012	0.012	TraesCS5B02G222700.2	0	0	0	0	0
pistillody-stamen	turquoise	GO:0009908	flower development	645	0.00012	0.012	TraesCS7B02G072700.1	0	0	0	0	0
pistillody-stamen	turquoise	GO:0009908	flower development	645	0.00012	0.012	TraesCS1B02G479300.1	0	0	1	0	0
pistillody-stamen	turquoise	GO:0009908	flower development	645	0.00012	0.012	TraesCS4D02G010100.1	0	0	0	0	0
pistillody-stamen	turquoise	GO:0009908	flower development	645	0.00012	0.012	TraesCS1A02G139200.1	0	0	0	0	0
pistillody-stamen	turquoise	GO:0009908	flower development	645	0.00012	0.012	TraesCS2A02G243300.4	0	0	0	0	0
pistillody-stamen	turquoise	GO:0009908	flower development	645	0.00012	0.012	TraesCS3B02G368400.1	0	0	0	0	0
pistillody-stamen	turquoise	GO:0009908	flower development	645	0.00012	0.012	TraesCS3B02G093800.2	0	0	0	0	0
pistillody-stamen	turquoise	GO:0009908	flower development	645	0.00012	0.012	TraesCS7A02G167900.1	0	0	0	0	0
pistillody-stamen	turquoise	GO:0009908	flower development	645	0.00012	0.012	TraesCS6D02G328800.1	0	0	0	0	0
pistillody-stamen	turquoise	GO:0009908	flower development	645	0.00012	0.012	TraesCS5D02G496300.3	0	0	0	0	0
pistillody-stamen	turquoise	GO:0009908	flower development	645	0.00012	0.012	TraesCS1A02G299500.1	0	0	0	0	0
pistillody-stamen	turquoise	GO:0009908	flower development	645	0.00012	0.012	TraesCS1A02G072200.1	0	0	0	0	0
pistillody-stamen	turquoise	GO:0009908	flower development	645	0.00012	0.012	TraesCS2D02G183000.1	0	0	0	0	0
pistillody-stamen	turquoise	GO:0009908	flower development	645	0.00012	0.012	TraesCS4B02G344300.1	0	0	0	0	0
pistillody-stamen	turquoise	GO:0009908	flower development	645	0.00012	0.012	TraesCS5A02G162800.3	0	0	0	0	0
pistillody-stamen	turquoise	GO:0009908	flower development	645	0.00012	0.012	TraesCS3B02G543300.1	0	0	1	0	0
pistillody-stamen	turquoise	GO:0009908	flower development	645	0.00012	0.012	TraesCS5B02G560300.1	0	0	0	0	0
pistillody-stamen	turquoise	GO:0009908	flower development	645	0.00012	0.012	TraesCS6A02G192600.1	0	0	0	0	0
pistillody-stamen	turquoise	GO:0009908	flower development	645	0.00012	0.012	TraesCS3A02G442200.1	0	0	0	0	0
pistillody-stamen	turquoise	GO:0009908	flower development	645	0.00012	0.012	TraesCS3A02G105100.1	0	0	0	0	0
pistillody-stamen	turquoise	GO:0009908	flower development	645	0.00012	0.012	TraesCS5B02G032000.1	0	0	0	0	0
pistillody-stamen	turquoise	GO:0009908	flower development	645	0.00012	0.012	TraesCS4A02G265100.1	0	0	1	0	0
pistillody-stamen	turquoise	GO:0009908	flower development	645	0.00012	0.012	TraesCS5A02G250600.1	0	0	0	0	0
pistillody-stamen	turquoise	GO:0009908	flower development	645	0.00012	0.012	TraesCS3B02G591000.1	0	0	0	0	0
pistillody-stamen	turquoise	GO:0009908	flower development	645	0.00012	0.012	TraesCS1D02G364800.1	0	0	0	0	0
pistillody-stamen	turquoise	GO:0009908	flower development	645	0.00012	0.012	TraesCS5B02G232200.1	0	0	1	0	0
pistillody-stamen	turquoise	GO:0009908	flower development	645	0.00012	0.012	TraesCS2B02G309300.2	0	0	0	0	0
pistillody-stamen	turquoise	GO:0009908	flower development	645	0.00012	0.012	TraesCS4A02G484300.2	0	0	0	0	0
pistillody-stamen	turquoise	GO:0009908	flower development	645	0.00012	0.012	TraesCS7A02G308400.1	0	0	1	0	0
pistillody-stamen	turquoise	GO:0009908	flower development	645	0.00012	0.012	TraesCS5A02G233700.1	0	0	1	0	0
pistillody-stamen	turquoise	GO:0009908	flower development	645	0.00012	0.012	TraesCS5D02G240600.1	0	0	0	0	0
pistillody-stamen	turquoise	GO:0009908	flower development	645	0.00012	0.012	TraesCS2A02G514200.1	0	0	0	0	0
pistillody-stamen	turquoise	GO:0009908	flower development	645	0.00012	0.012	TraesCS2B02G191500.1	0	0	0	0	0
pistillody-stamen	turquoise	GO:0009908	flower development	645	0.00012	0.012	TraesCS2A02G199600.1	0	0	0	0	0
pistillody-stamen	turquoise	GO:0009908	flower development	645	0.00012	0.012	TraesCS7D02G338800.1	0	0	0	0	0
pistillody-stamen	turquoise	GO:0009908	flower development	645	0.00012	0.012	TraesCS1B02G168500.1	0	0	0	0	0
pistillody-stamen	turquoise	GO:0009908	flower development	645	0.00012	0.012	TraesCS6D02G246300.1	0	0	1	0	0
pistillody-stamen	turquoise	GO:0009908	flower development	645	0.00012	0.012	TraesCS2B02G223600.1	0	0	0	0	0
pistillody-stamen	turquoise	GO:0009908	flower development	645	0.00012	0.012	TraesCS5B02G260000.2	0	0	1	0	0
pistillody-stamen	turquoise	GO:0009908	flower development	645	0.00012	0.012	TraesCS2B02G219300.1	0	0	1	0	0
pistillody-stamen	turquoise	GO:0009908	flower development	645	0.00012	0.012	TraesCS5B02G319600.1	0	0	0	0	0
pistillody-stamen	turquoise	GO:0009908	flower development	645	0.00012	0.012	TraesCS4A02G345200.1	0	0	0	0	0
pistillody-stamen	turquoise	GO:0009908	flower development	645	0.00012	0.012	TraesCS1B02G273100.2	0	0	1	0	0
pistillody-stamen	turquoise	GO:0009908	flower development	645	0.00012	0.012	TraesCS6A02G026500.2	0	0	0	0	0
pistillody-stamen	turquoise	GO:0009908	flower development	645	0.00012	0.012	TraesCS3A02G379400.1	0	0	0	0	0
pistillody-stamen	turquoise	GO:0009908	flower development	645	0.00012	0.012	TraesCS2B02G630100.1	0	0	0	0	0
pistillody-stamen	turquoise	GO:0009908	flower development	645	0.00012	0.012	TraesCS2D02G232800.1	0	0	0	0	0
pistillody-stamen	turquoise	GO:0009908	flower development	645	0.00012	0.012	TraesCS3D02G434500.1	0	0	0	0	0
pistillody-stamen	turquoise	GO:0009908	flower development	645	0.00012	0.012	TraesCS2D02G172500.1	0	0	0	0	0
pistillody-stamen	turquoise	GO:0009908	flower development	645	0.00012	0.012	TraesCS2B02G341800.2	0	0	0	0	0
pistillody-stamen	turquoise	GO:0009908	flower development	645	0.00012	0.012	TraesCS2A02G338200.1	0	0	0	0	0
pistillody-stamen	turquoise	GO:0009908	flower development	645	0.00012	0.012	TraesCS4B02G067700.1	0	0	0	0	0
pistillody-stamen	turquoise	GO:0009908	flower development	645	0.00012	0.012	TraesCS2D02G578100.1	0	0	0	0	0
pistillody-stamen	turquoise	GO:0009908	flower development	645	0.00012	0.012	TraesCS7B02G208600.1	0	0	0	0	0
pistillody-stamen	turquoise	GO:0009908	flower development	645	0.00012	0.012	TraesCS5B02G159900.5	0	0	0	0	0
pistillody-stamen	turquoise	GO:0009908	flower development	645	0.00012	0.012	TraesCS3B02G577900.1	0	0	0	0	0
pistillody-stamen	turquoise	GO:0009908	flower development	645	0.00012	0.012	TraesCS2D02G162000.1	0	0	0	0	0
pistillody-stamen	turquoise	GO:0009908	flower development	645	0.00012	0.012	TraesCS6D02G278700.1	0	0	0	0	0
pistillody-stamen	turquoise	GO:0009908	flower development	645	0.00012	0.012	TraesCS1D02G243300.1	0	0	0	0	0
pistillody-stamen	turquoise	GO:0009908	flower development	645	0.00012	0.012	TraesCS4A02G195800.1	0	0	0	0	0
pistillody-stamen	turquoise	GO:0009908	flower development	645	0.00012	0.012	TraesCS6B02G104100.1	0	0	0	0	0
pistillody-stamen	turquoise	GO:0009908	flower development	645	0.00012	0.012	TraesCS3A02G072700.1	0	0	0	0	0
pistillody-stamen	turquoise	GO:0009908	flower development	645	0.00012	0.012	TraesCS2D02G009700.1	0	0	0	0	0
pistillody-stamen	turquoise	GO:0009908	flower development	645	0.00012	0.012	TraesCS5A02G079100.1	0	0	1	0	0
pistillody-stamen	turquoise	GO:0009908	flower development	645	0.00012	0.012	TraesCS1A02G262500.1	0	0	1	0	0
pistillody-stamen	turquoise	GO:0009908	flower development	645	0.00012	0.012	TraesCS3D02G489400.1	0	0	0	0	0
pistillody-stamen	turquoise	GO:0009908	flower development	645	0.00012	0.012	TraesCS5A02G177300.1	0	0	0	0	0
pistillody-stamen	turquoise	GO:0009908	flower development	645	0.00012	0.012	TraesCS5A02G487200.1	0	0	1	0	0
pistillody-stamen	turquoise	GO:0009908	flower development	645	0.00012	0.012	TraesCS6A02G069500.1	0	0	0	0	0
pistillody-stamen	turquoise	GO:0009908	flower development	645	0.00012	0.012	TraesCS1A02G262700.1	0	0	0	0	0
pistillody-stamen	turquoise	GO:0009908	flower development	645	0.00012	0.012	TraesCS4D02G286400.1	0	0	1	0	0
pistillody-stamen	turquoise	GO:0009908	flower development	645	0.00012	0.012	TraesCS6A02G129700.1	0	0	0	0	0
pistillody-stamen	turquoise	GO:0009908	flower development	645	0.00012	0.012	TraesCS5B02G037900.1	0	0	0	0	0
pistillody-stamen	turquoise	GO:0009908	flower development	645	0.00012	0.012	TraesCS6A02G266400.2	0	0	0	0	0
pistillody-stamen	turquoise	GO:0009908	flower development	645	0.00012	0.012	TraesCS2D02G060100.3	0	0	0	0	0
pistillody-stamen	turquoise	GO:0009908	flower development	645	0.00012	0.012	TraesCS1A02G125800.1	0	0	0	0	0
pistillody-stamen	turquoise	GO:0009908	flower development	645	0.00012	0.012	TraesCS4D02G232000.1	0	0	0	0	0
pistillody-stamen	turquoise	GO:0009908	flower development	645	0.00012	0.012	TraesCS3B02G224600.2	0	0	0	0	0
pistillody-stamen	turquoise	GO:0009908	flower development	645	0.00012	0.012	TraesCS2D02G133800.1	0	0	0	0	0
pistillody-stamen	turquoise	GO:0009908	flower development	645	0.00012	0.012	TraesCS4A02G119800.1	0	0	1	0	0
pistillody-stamen	turquoise	GO:0009908	flower development	645	0.00012	0.012	TraesCS2A02G187800.1	0	0	1	0	0
pistillody-stamen	turquoise	GO:0009908	flower development	645	0.00012	0.012	TraesCS5A02G286700.1	0	0	0	0	0
pistillody-stamen	turquoise	GO:0009908	flower development	645	0.00012	0.012	TraesCS7B02G181700.1	0	0	1	0	0
pistillody-stamen	turquoise	GO:0009908	flower development	645	0.00012	0.012	TraesCS2D02G473700.1	0	0	1	0	0
pistillody-stamen	turquoise	GO:0009908	flower development	645	0.00012	0.012	TraesCS7D02G510400.1	0	0	0	0	0
pistillody-stamen	turquoise	GO:0009908	flower development	645	0.00012	0.012	TraesCS1D02G448700.1	0	0	0	0	0
pistillody-stamen	turquoise	GO:0009908	flower development	645	0.00012	0.012	TraesCS4D02G050200.1	0	0	1	0	0
pistillody-stamen	turquoise	GO:0009908	flower development	645	0.00012	0.012	TraesCS1D02G067200.1	0	0	0	0	0
pistillody-stamen	turquoise	GO:0009908	flower development	645	0.00012	0.012	TraesCS1A02G350800.1	0	0	0	0	0
pistillody-stamen	turquoise	GO:0009908	flower development	645	0.00012	0.012	TraesCS6A02G107700.1	0	0	0	0	0
pistillody-stamen	turquoise	GO:0009908	flower development	645	0.00012	0.012	TraesCS1D02G278000.1	0	0	0	0	0
pistillody-stamen	turquoise	GO:0009908	flower development	645	0.00012	0.012	TraesCS3D02G502600.1	0	0	1	0	0
pistillody-stamen	turquoise	GO:0009908	flower development	645	0.00012	0.012	TraesCS2B02G548500.1	0	0	0	0	0
pistillody-stamen	turquoise	GO:0009908	flower development	645	0.00012	0.012	TraesCS2B02G343800.1	0	0	0	0	0
pistillody-stamen	turquoise	GO:0009908	flower development	645	0.00012	0.012	TraesCS2A02G474000.1	0	0	0	0	0
pistillody-stamen	turquoise	GO:0009908	flower development	645	0.00012	0.012	TraesCS7B02G070200.1	0	0	0	0	0
pistillody-stamen	turquoise	GO:0009908	flower development	645	0.00012	0.012	TraesCS3D02G124800.1	0	0	0	0	0
pistillody-stamen	turquoise	GO:0009908	flower development	645	0.00012	0.012	TraesCS7A02G059000.1	0	0	0	0	0
pistillody-stamen	turquoise	GO:0009908	flower development	645	0.00012	0.012	TraesCS1B02G365000.1	0	0	0	0	0
pistillody-stamen	turquoise	GO:0009908	flower development	645	0.00012	0.012	TraesCS5B02G039200.1	0	0	0	0	0
pistillody-stamen	turquoise	GO:0009908	flower development	645	0.00012	0.012	TraesCS7D02G257000.1	0	0	0	0	0
pistillody-stamen	turquoise	GO:0009908	flower development	645	0.00012	0.012	TraesCS6B02G036900.2	0	0	0	0	0
pistillody-stamen	turquoise	GO:0009908	flower development	645	0.00012	0.012	TraesCS4B02G042200.2	0	0	0	0	0
pistillody-stamen	turquoise	GO:0009908	flower development	645	0.00012	0.012	TraesCS2A02G344300.1	0	0	0	0	0
pistillody-stamen	turquoise	GO:0009908	flower development	645	0.00012	0.012	TraesCS3A02G454600.1	0	0	0	0	0
pistillody-stamen	turquoise	GO:0009908	flower development	645	0.00012	0.012	TraesCS3B02G607600.1	0	0	0	0	0
pistillody-stamen	turquoise	GO:0009908	flower development	645	0.00012	0.012	TraesCS4A02G406000.1	0	0	0	0	0
pistillody-stamen	turquoise	GO:0009908	flower development	645	0.00012	0.012	TraesCS3D02G497300.1	0	0	0	0	0
pistillody-stamen	turquoise	GO:0009908	flower development	645	0.00012	0.012	TraesCS2D02G014700.1	0	0	0	0	0
pistillody-stamen	turquoise	GO:0009908	flower development	645	0.00012	0.012	TraesCS1D02G370800.1	0	0	0	0	0
pistillody-stamen	turquoise	GO:0009908	flower development	645	0.00012	0.012	TraesCS2A02G263100.1	0	0	0	0	0
pistillody-stamen	turquoise	GO:0009908	flower development	645	0.00012	0.012	TraesCS2A02G154500.2	0	0	0	0	0
pistillody-stamen	turquoise	GO:0009908	flower development	645	0.00012	0.012	TraesCS6B02G445800.1	0	0	0	0	0
pistillody-stamen	turquoise	GO:0009908	flower development	645	0.00012	0.012	TraesCS5B02G286000.1	0	0	0	0	0
pistillody-stamen	turquoise	GO:0009908	flower development	645	0.00012	0.012	TraesCS7B02G052800.1	0	0	0	0	0
pistillody-stamen	turquoise	GO:0009908	flower development	645	0.00012	0.012	TraesCS7B02G190000.3	0	0	0	0	0
pistillody-stamen	turquoise	GO:0009908	flower development	645	0.00012	0.012	TraesCS6A02G218900.1	0	0	0	0	0
pistillody-stamen	turquoise	GO:0009908	flower development	645	0.00012	0.012	TraesCS7A02G242200.1	0	0	0	0	0
pistillody-stamen	turquoise	GO:0009908	flower development	645	0.00012	0.012	TraesCS7D02G010500.1	0	0	0	0	0
pistillody-stamen	turquoise	GO:0009908	flower development	645	0.00012	0.012	TraesCS3D02G397200.1	0	0	1	0	0
pistillody-stamen	turquoise	GO:0009908	flower development	645	0.00012	0.012	TraesCS7A02G149100.1	0	0	0	0	0
pistillody-stamen	turquoise	GO:0009908	flower development	645	0.00012	0.012	TraesCS3D02G219500.1	0	0	0	0	0
pistillody-stamen	turquoise	GO:0009908	flower development	645	0.00012	0.012	TraesCS2D02G285000.1	0	0	0	0	0
pistillody-stamen	turquoise	GO:0009908	flower development	645	0.00012	0.012	TraesCS7D02G082800.1	0	0	0	0	0
pistillody-stamen	turquoise	GO:0009908	flower development	645	0.00012	0.012	TraesCS3D02G516900.1	0	0	0	0	0
pistillody-stamen	turquoise	GO:0009908	flower development	645	0.00012	0.012	TraesCS6D02G030300.2	0	0	0	0	0
pistillody-stamen	turquoise	GO:0009908	flower development	645	0.00012	0.012	TraesCS1A02G236900.2	0	0	0	0	0
pistillody-stamen	turquoise	GO:0009908	flower development	645	0.00012	0.012	TraesCS1A02G363700.1	0	0	0	0	0
pistillody-stamen	turquoise	GO:0009908	flower development	645	0.00012	0.012	TraesCS4B02G091400.1	0	0	0	0	0
pistillody-stamen	turquoise	GO:0009908	flower development	645	0.00012	0.012	TraesCS1B02G333100.1	0	0	0	0	0
pistillody-stamen	turquoise	GO:0009908	flower development	645	0.00012	0.012	TraesCS1A02G052000.1	0	0	0	0	0
pistillody-stamen	turquoise	GO:0009908	flower development	645	0.00012	0.012	TraesCS3D02G354000.1	0	0	0	0	0
pistillody-stamen	turquoise	GO:0009908	flower development	645	0.00012	0.012	TraesCS6B02G379500.1	0	0	0	0	0
pistillody-stamen	turquoise	GO:0009908	flower development	645	0.00012	0.012	TraesCS5B02G431100.1	0	0	0	0	0
pistillody-stamen	turquoise	GO:0009908	flower development	645	0.00012	0.012	TraesCS2A02G422400.1	0	0	0	0	0
pistillody-stamen	turquoise	GO:0009908	flower development	645	0.00012	0.012	TraesCS4D02G233200.1	0	0	0	0	0
pistillody-stamen	turquoise	GO:0009908	flower development	645	0.00012	0.012	TraesCS1D02G262400.1	0	0	1	0	0
pistillody-stamen	turquoise	GO:0009908	flower development	645	0.00012	0.012	TraesCS7A02G165600.1	0	0	0	0	0
pistillody-stamen	turquoise	GO:0009908	flower development	645	0.00012	0.012	TraesCS5D02G294500.1	0	0	0	0	0
pistillody-stamen	turquoise	GO:0009908	flower development	645	0.00012	0.012	TraesCS5D02G550700.1	0	0	1	0	0
pistillody-stamen	turquoise	GO:0009908	flower development	645	0.00012	0.012	TraesCS2A02G061100.3	0	0	0	0	0
pistillody-stamen	turquoise	GO:0009908	flower development	645	0.00012	0.012	TraesCS2D02G203900.2	0	0	0	0	0
pistillody-stamen	turquoise	GO:0009908	flower development	645	0.00012	0.012	TraesCS3B02G235600.1	0	0	0	0	0
pistillody-stamen	turquoise	GO:0009908	flower development	645	0.00012	0.012	TraesCS5D02G063500.1	0	0	0	0	0
pistillody-stamen	turquoise	GO:0009908	flower development	645	0.00012	0.012	TraesCS5A02G390300.2	0	0	0	0	0
pistillody-stamen	turquoise	GO:0009908	flower development	645	0.00012	0.012	TraesCS4D02G088400.1	0	0	1	0	0
pistillody-stamen	turquoise	GO:0009908	flower development	645	0.00012	0.012	TraesCS7A02G404400.1	0	0	0	0	0
pistillody-stamen	turquoise	GO:0009908	flower development	645	0.00012	0.012	TraesCS1D02G346800.1	0	0	0	0	0
pistillody-stamen	turquoise	GO:0009908	flower development	645	0.00012	0.012	TraesCS4D02G040000.2	0	0	0	0	0
pistillody-stamen	turquoise	GO:0009908	flower development	645	0.00012	0.012	TraesCS5D02G388700.1	0	0	0	0	0
pistillody-stamen	turquoise	GO:0009908	flower development	645	0.00012	0.012	TraesCS5A02G196000.2	0	0	0	0	0
pistillody-stamen	turquoise	GO:0009908	flower development	645	0.00012	0.012	TraesCS6A02G251200.2	0	0	0	0	0
pistillody-stamen	turquoise	GO:0009908	flower development	645	0.00012	0.012	TraesCS1D02G162600.1	0	0	0	0	0
pistillody-stamen	turquoise	GO:0009908	flower development	645	0.00012	0.012	TraesCS5A02G175300.3	0	0	0	0	0
pistillody-stamen	turquoise	GO:0009908	flower development	645	0.00012	0.012	TraesCS6B02G281400.1	0	0	1	0	0
pistillody-stamen	turquoise	GO:0009908	flower development	645	0.00012	0.012	TraesCS5B02G484800.1	0	0	0	0	0
pistillody-stamen	turquoise	GO:0009908	flower development	645	0.00012	0.012	TraesCS3D02G359100.1	0	0	0	0	0
pistillody-stamen	turquoise	GO:0009908	flower development	645	0.00012	0.012	TraesCS7D02G280800.2	0	0	0	0	0
pistillody-stamen	turquoise	GO:0009908	flower development	645	0.00012	0.012	TraesCS7D02G375900.1	0	0	0	0	0
pistillody-stamen	turquoise	GO:0009908	flower development	645	0.00012	0.012	TraesCS5D02G179800.1	0	0	0	0	0
pistillody-stamen	turquoise	GO:0009908	flower development	645	0.00012	0.012	TraesCS7D02G026600.2	0	0	0	0	0
pistillody-stamen	turquoise	GO:0009908	flower development	645	0.00012	0.012	TraesCS2A02G478800.1	0	0	0	0	0
pistillody-stamen	turquoise	GO:0009908	flower development	645	0.00012	0.012	TraesCS6B02G173200.1	0	0	0	0	0
pistillody-stamen	turquoise	GO:0009908	flower development	645	0.00012	0.012	TraesCS5A02G343100.1	0	0	0	0	0
pistillody-stamen	turquoise	GO:0009908	flower development	645	0.00012	0.012	TraesCS3D02G191600.4	0	0	1	0	0
pistillody-stamen	turquoise	GO:0009908	flower development	645	0.00012	0.012	TraesCS3A02G282200.1	0	0	0	0	0
pistillody-stamen	turquoise	GO:0009908	flower development	645	0.00012	0.012	TraesCS3D02G002000.1	0	0	0	0	0
pistillody-stamen	turquoise	GO:0009908	flower development	645	0.00012	0.012	TraesCS3B02G248200.1	0	0	1	0	0
pistillody-stamen	turquoise	GO:0009908	flower development	645	0.00012	0.012	TraesCS3B02G157500.1	0	0	0	0	0
pistillody-stamen	turquoise	GO:0009908	flower development	645	0.00012	0.012	TraesCS5B02G501000.1	0	0	1	0	0
pistillody-stamen	turquoise	GO:0009908	flower development	645	0.00012	0.012	TraesCS2D02G103800.1	0	0	0	0	0
pistillody-stamen	turquoise	GO:0009908	flower development	645	0.00012	0.012	TraesCS6A02G312500.2	0	0	1	0	0
pistillody-stamen	turquoise	GO:0009908	flower development	645	0.00012	0.012	TraesCS1D02G416100.1	0	0	0	0	0
pistillody-stamen	turquoise	GO:0009908	flower development	645	0.00012	0.012	TraesCS5D02G157600.1	0	0	0	0	0
pistillody-stamen	turquoise	GO:0009908	flower development	645	0.00012	0.012	TraesCS4D02G154300.3	0	0	0	0	0
pistillody-stamen	turquoise	GO:0009908	flower development	645	0.00012	0.012	TraesCS5D02G040800.1	0	0	0	0	0
pistillody-stamen	turquoise	GO:0009908	flower development	645	0.00012	0.012	TraesCS4D02G235800.1	0	0	1	0	0
pistillody-stamen	turquoise	GO:0009908	flower development	645	0.00012	0.012	TraesCS4D02G132100.1	0	0	0	0	0
pistillody-stamen	turquoise	GO:0009908	flower development	645	0.00012	0.012	TraesCS1A02G066200.1	0	0	1	0	0
pistillody-stamen	turquoise	GO:0009908	flower development	645	0.00012	0.012	TraesCS3A02G329400.1	0	0	0	0	0
pistillody-stamen	turquoise	GO:0009908	flower development	645	0.00012	0.012	TraesCS3B02G435700.1	0	0	1	0	0
pistillody-stamen	turquoise	GO:0009908	flower development	645	0.00012	0.012	TraesCS2D02G462500.1	0	0	0	0	0
pistillody-stamen	turquoise	GO:0009908	flower development	645	0.00012	0.012	TraesCS5D02G170100.1	0	0	0	0	0
pistillody-stamen	turquoise	GO:0009908	flower development	645	0.00012	0.012	TraesCS6A02G324500.1	0	0	1	0	0
pistillody-stamen	turquoise	GO:0009908	flower development	645	0.00012	0.012	TraesCS3A02G449300.2	0	0	0	0	0
pistillody-stamen	turquoise	GO:0009908	flower development	645	0.00012	0.012	TraesCS6D02G107300.1	0	0	0	0	0
pistillody-stamen	turquoise	GO:0009908	flower development	645	0.00012	0.012	TraesCS7B02G200900.2	0	0	0	0	0
pistillody-stamen	turquoise	GO:0009908	flower development	645	0.00012	0.012	TraesCS1A02G404600.1	0	0	0	0	0
pistillody-stamen	turquoise	GO:0009908	flower development	645	0.00012	0.012	TraesCS5A02G245800.1	0	0	0	0	0
pistillody-stamen	turquoise	GO:0009908	flower development	645	0.00012	0.012	TraesCS4B02G137400.1	0	0	0	0	0
pistillody-stamen	turquoise	GO:0009908	flower development	645	0.00012	0.012	TraesCS6D02G127600.2	0	0	0	0	0
pistillody-stamen	turquoise	GO:0009908	flower development	645	0.00012	0.012	TraesCS7D02G068400.1	0	0	0	0	0
pistillody-stamen	turquoise	GO:0009908	flower development	645	0.00012	0.012	TraesCS5A02G482700.2	0	0	0	0	0
pistillody-stamen	turquoise	GO:0009908	flower development	645	0.00012	0.012	TraesCS3D02G234500.1	0	0	0	0	0
pistillody-stamen	turquoise	GO:0009908	flower development	645	0.00012	0.012	TraesCS2A02G184700.1	0	0	0	0	0
pistillody-stamen	turquoise	GO:0009908	flower development	645	0.00012	0.012	TraesCS4B02G064000.1	0	0	0	0	0
pistillody-stamen	turquoise	GO:0009908	flower development	645	0.00012	0.012	TraesCS7A02G220600.1	0	0	0	0	0
pistillody-stamen	turquoise	GO:0009908	flower development	645	0.00012	0.012	TraesCS6D02G240200.2	0	0	0	0	0
pistillody-stamen	turquoise	GO:0009908	flower development	645	0.00012	0.012	TraesCS2A02G033700.1	0	0	0	0	0
pistillody-stamen	turquoise	GO:0009908	flower development	645	0.00012	0.012	TraesCS7A02G311800.1	0	0	0	0	0
pistillody-stamen	turquoise	GO:0009908	flower development	645	0.00012	0.012	TraesCS1A02G444500.1	0	0	0	0	0
pistillody-stamen	turquoise	GO:0009908	flower development	645	0.00012	0.012	TraesCS3D02G245800.2	0	0	0	0	0
pistillody-stamen	turquoise	GO:0009908	flower development	645	0.00012	0.012	TraesCS3B02G244700.1	0	0	0	0	0
pistillody-stamen	turquoise	GO:0009908	flower development	645	0.00012	0.012	TraesCS1D02G095500.1	0	0	0	0	0
pistillody-stamen	turquoise	GO:0009908	flower development	645	0.00012	0.012	TraesCS1B02G002000.1	0	0	0	0	0
pistillody-stamen	turquoise	GO:0009908	flower development	645	0.00012	0.012	TraesCS4A02G284600.3	0	0	0	0	0
pistillody-stamen	turquoise	GO:0009908	flower development	645	0.00012	0.012	TraesCS7D02G303200.1	0	0	0	0	0
pistillody-stamen	turquoise	GO:0009908	flower development	645	0.00012	0.012	TraesCS7D02G127100.2	0	0	0	0	0
pistillody-stamen	turquoise	GO:0009908	flower development	645	0.00012	0.012	TraesCS2B02G550700.1	0	0	0	0	0
pistillody-stamen	turquoise	GO:0009908	flower development	645	0.00012	0.012	TraesCS1A02G224500.1	0	0	0	0	0
pistillody-stamen	turquoise	GO:0009908	flower development	645	0.00012	0.012	TraesCS7B02G281100.1	0	0	0	0	0
pistillody-stamen	turquoise	GO:0009908	flower development	645	0.00012	0.012	TraesCS6B02G186700.1	0	0	0	0	0
pistillody-stamen	turquoise	GO:0009908	flower development	645	0.00012	0.012	TraesCS2D02G523100.2	0	0	0	0	0
pistillody-stamen	turquoise	GO:0009908	flower development	645	0.00012	0.012	TraesCS4D02G173100.1	0	0	0	0	0
pistillody-stamen	turquoise	GO:0009908	flower development	645	0.00012	0.012	TraesCS1B02G473400.1	0	0	0	0	0
pistillody-stamen	turquoise	GO:0009908	flower development	645	0.00012	0.012	TraesCS4A02G141000.3	0	0	0	0	0
pistillody-stamen	turquoise	GO:0009908	flower development	645	0.00012	0.012	TraesCS2B02G021100.1	0	0	0	0	0
pistillody-stamen	turquoise	GO:0009908	flower development	645	0.00012	0.012	TraesCS6D02G225100.1	0	0	0	0	0
pistillody-stamen	turquoise	GO:0009908	flower development	645	0.00012	0.012	TraesCS5B02G164300.1	0	0	0	0	0
pistillody-stamen	turquoise	GO:0009908	flower development	645	0.00012	0.012	TraesCS2D02G309900.1	0	0	0	0	0
pistillody-stamen	turquoise	GO:0009908	flower development	645	0.00012	0.012	TraesCS2B02G179700.1	0	0	0	0	0
pistillody-stamen	turquoise	GO:0009908	flower development	645	0.00012	0.012	TraesCS7B02G402300.1	0	0	0	0	0
pistillody-stamen	turquoise	GO:0009908	flower development	645	0.00012	0.012	TraesCS6D02G315700.1	0	0	0	0	0
pistillody-stamen	turquoise	GO:0009908	flower development	645	0.00012	0.012	TraesCS7D02G219700.1	0	0	0	0	0
pistillody-stamen	turquoise	GO:0009908	flower development	645	0.00012	0.012	TraesCS7A02G532900.1	0	0	0	0	0
pistillody-stamen	turquoise	GO:0009908	flower development	645	0.00012	0.012	TraesCS6B02G209600.1	0	0	0	0	0
pistillody-stamen	turquoise	GO:0009908	flower development	645	0.00012	0.012	TraesCS5A02G206700.1	0	0	0	0	0
pistillody-stamen	turquoise	GO:0009908	flower development	645	0.00012	0.012	TraesCS1B02G091700.1	0	0	0	0	0
pistillody-stamen	turquoise	GO:0009908	flower development	645	0.00012	0.012	TraesCS7D02G397800.1	0	0	0	0	0
pistillody-stamen	turquoise	GO:0009908	flower development	645	0.00012	0.012	TraesCS5B02G555800.1	0	0	0	0	0
pistillody-stamen	turquoise	GO:0009908	flower development	645	0.00012	0.012	TraesCS2D02G116700.1	0	0	1	0	0
pistillody-stamen	turquoise	GO:0009908	flower development	645	0.00012	0.012	TraesCS2A02G504000.1	0	0	0	0	0
pistillody-stamen	turquoise	GO:0009908	flower development	645	0.00012	0.012	TraesCS6D02G219500.1	0	0	0	0	0
pistillody-stamen	turquoise	GO:0009908	flower development	645	0.00012	0.012	TraesCS7D02G150700.1	0	0	0	0	0
pistillody-stamen	turquoise	GO:0009908	flower development	645	0.00012	0.012	TraesCS6D02G147400.1	0	0	0	0	0
pistillody-stamen	turquoise	GO:0009908	flower development	645	0.00012	0.012	TraesCS2A02G007900.1	0	0	0	0	0
pistillody-stamen	turquoise	GO:0009908	flower development	645	0.00012	0.012	TraesCS5A02G407500.2	0	0	1	0	0
pistillody-stamen	turquoise	GO:0009908	flower development	645	0.00012	0.012	TraesCS7D02G364500.1	0	0	0	0	0
pistillody-stamen	turquoise	GO:0009908	flower development	645	0.00012	0.012	TraesCS3D02G434900.1	0	0	1	0	0
pistillody-stamen	turquoise	GO:0009908	flower development	645	0.00012	0.012	TraesCS7A02G270900.1	0	0	0	0	0
pistillody-stamen	turquoise	GO:0009908	flower development	645	0.00012	0.012	TraesCS5B02G364100.3	0	0	0	0	0
pistillody-stamen	turquoise	GO:0009908	flower development	645	0.00012	0.012	TraesCS5A02G380400.2	0	0	0	0	0
pistillody-stamen	turquoise	GO:0009908	flower development	645	0.00012	0.012	TraesCS1D02G452700.1	0	0	0	0	0
pistillody-stamen	turquoise	GO:0009908	flower development	645	0.00012	0.012	TraesCS5A02G475200.1	0	0	0	0	0
pistillody-stamen	turquoise	GO:0009908	flower development	645	0.00012	0.012	TraesCS3D02G093400.2	0	0	0	0	0
pistillody-stamen	turquoise	GO:0009908	flower development	645	0.00012	0.012	TraesCS4D02G241100.1	0	0	0	0	0
pistillody-stamen	turquoise	GO:0009908	flower development	645	0.00012	0.012	TraesCS2D02G322600.1	0	0	0	0	0
pistillody-stamen	turquoise	GO:0009908	flower development	645	0.00012	0.012	TraesCS7D02G465100.1	0	0	0	0	0
pistillody-stamen	turquoise	GO:0009908	flower development	645	0.00012	0.012	TraesCS3D02G221900.1	0	0	0	0	0
pistillody-stamen	turquoise	GO:0009908	flower development	645	0.00012	0.012	TraesCS4B02G287600.1	0	0	0	0	0
pistillody-stamen	turquoise	GO:0009908	flower development	645	0.00012	0.012	TraesCS3D02G447300.1	0	0	0	0	0
pistillody-stamen	turquoise	GO:0009908	flower development	645	0.00012	0.012	TraesCS4D02G152400.2	0	0	0	0	0
pistillody-stamen	turquoise	GO:0009908	flower development	645	0.00012	0.012	TraesCS3B02G503300.2	0	0	0	0	0
pistillody-stamen	turquoise	GO:0009908	flower development	645	0.00012	0.012	TraesCS7A02G371200.1	0	0	0	0	0
pistillody-stamen	turquoise	GO:0009908	flower development	645	0.00012	0.012	TraesCS4A02G180100.1	0	0	0	0	0
pistillody-stamen	turquoise	GO:0009908	flower development	645	0.00012	0.012	TraesCS5A02G167300.2	0	0	0	0	0
pistillody-stamen	turquoise	GO:0009908	flower development	645	0.00012	0.012	TraesCS5B02G160200.1	0	0	0	0	0
pistillody-stamen	turquoise	GO:0009908	flower development	645	0.00012	0.012	TraesCS3A02G259900.1	0	0	0	0	0
pistillody-stamen	turquoise	GO:0009908	flower development	645	0.00012	0.012	TraesCS3A02G140100.1	0	0	1	0	0
pistillody-stamen	turquoise	GO:0009908	flower development	645	0.00012	0.012	TraesCS3A02G142200.1	0	0	0	0	0
pistillody-stamen	turquoise	GO:0009908	flower development	645	0.00012	0.012	TraesCS1B02G273300.1	0	0	0	0	0
pistillody-stamen	turquoise	GO:0009908	flower development	645	0.00012	0.012	TraesCS7A02G087700.1	0	0	1	0	0
pistillody-stamen	turquoise	GO:0009908	flower development	645	0.00012	0.012	TraesCS5A02G370200.1	0	0	0	0	0
pistillody-stamen	turquoise	GO:0009908	flower development	645	0.00012	0.012	TraesCS7D02G284100.1	0	0	0	0	0
pistillody-stamen	turquoise	GO:0009908	flower development	645	0.00012	0.012	TraesCS5B02G563900.2	0	0	1	0	0
pistillody-stamen	turquoise	GO:0009908	flower development	645	0.00012	0.012	TraesCS1D02G365100.1	0	0	0	0	0
pistillody-stamen	turquoise	GO:0009908	flower development	645	0.00012	0.012	TraesCS5A02G402800.1	0	0	0	0	0
pistillody-stamen	turquoise	GO:0009908	flower development	645	0.00012	0.012	TraesCS6A02G118100.1	0	0	0	0	0
pistillody-stamen	turquoise	GO:0009908	flower development	645	0.00012	0.012	TraesCS7D02G244000.1	0	0	1	0	0
pistillody-stamen	turquoise	GO:0009908	flower development	645	0.00012	0.012	TraesCS1D02G412300.1	0	0	0	0	0
pistillody-stamen	turquoise	GO:0009908	flower development	645	0.00012	0.012	TraesCS7A02G329700.3	0	0	0	0	0
pistillody-stamen	turquoise	GO:0009908	flower development	645	0.00012	0.012	TraesCS4A02G074700.1	0	0	1	0	0
pistillody-stamen	turquoise	GO:0009908	flower development	645	0.00012	0.012	TraesCS5D02G235300.1	0	0	0	0	0
pistillody-stamen	turquoise	GO:0009908	flower development	645	0.00012	0.012	TraesCS6B02G181300.1	0	0	0	0	0
pistillody-stamen	turquoise	GO:0009908	flower development	645	0.00012	0.012	TraesCS3D02G079200.2	0	0	0	0	0
pistillody-stamen	turquoise	GO:0009908	flower development	645	0.00012	0.012	TraesCS5A02G263600.1	0	0	0	0	0
pistillody-stamen	turquoise	GO:0009908	flower development	645	0.00012	0.012	TraesCS3A02G178700.1	0	0	0	0	0
pistillody-stamen	turquoise	GO:0009908	flower development	645	0.00012	0.012	TraesCS3B02G381400.1	0	0	0	0	0
pistillody-stamen	turquoise	GO:0009908	flower development	645	0.00012	0.012	TraesCS3D02G091000.2	0	0	0	0	0
pistillody-stamen	turquoise	GO:0009908	flower development	645	0.00012	0.012	TraesCS3D02G223700.1	0	0	0	0	0
pistillody-stamen	turquoise	GO:0009908	flower development	645	0.00012	0.012	TraesCS3B02G503100.1	0	0	0	0	0
pistillody-stamen	turquoise	GO:0009908	flower development	645	0.00012	0.012	TraesCS7D02G166400.1	0	0	0	0	0
pistillody-stamen	turquoise	GO:0009908	flower development	645	0.00012	0.012	TraesCS7A02G293300.3	0	0	0	0	0
pistillody-stamen	turquoise	GO:0009908	flower development	645	0.00012	0.012	TraesCS7D02G416400.1	0	0	1	0	0
pistillody-stamen	turquoise	GO:0009908	flower development	645	0.00012	0.012	TraesCS2D02G159900.1	0	0	0	0	0
pistillody-stamen	turquoise	GO:0009908	flower development	645	0.00012	0.012	TraesCS5A02G242400.1	0	0	0	0	0
pistillody-stamen	turquoise	GO:0009908	flower development	645	0.00012	0.012	TraesCS3A02G093000.1	0	0	0	0	0
pistillody-stamen	turquoise	GO:0009908	flower development	645	0.00012	0.012	TraesCS2B02G542400.2	0	0	0	0	0
pistillody-stamen	turquoise	GO:0009908	flower development	645	0.00012	0.012	TraesCS2D02G418800.1	0	0	0	0	0
pistillody-stamen	turquoise	GO:0009908	flower development	645	0.00012	0.012	TraesCS3D02G336200.1	0	0	0	0	0
pistillody-stamen	turquoise	GO:0009908	flower development	645	0.00012	0.012	TraesCS3B02G338100.1	0	0	1	0	0
pistillody-stamen	turquoise	GO:0009908	flower development	645	0.00012	0.012	TraesCS2A02G567600.1	0	0	0	0	0
pistillody-stamen	turquoise	GO:0009908	flower development	645	0.00012	0.012	TraesCS3A02G199400.1	0	0	0	0	0
pistillody-stamen	turquoise	GO:0009908	flower development	645	0.00012	0.012	TraesCS7D02G349300.1	0	0	0	0	0
pistillody-stamen	turquoise	GO:0009908	flower development	645	0.00012	0.012	TraesCS2B02G197200.1	0	0	0	0	0
pistillody-stamen	turquoise	GO:0009908	flower development	645	0.00012	0.012	TraesCS5D02G325400.2	0	0	0	0	0
pistillody-stamen	turquoise	GO:0009908	flower development	645	0.00012	0.012	TraesCS2A02G281000.3	0	0	0	0	0
pistillody-stamen	turquoise	GO:0009908	flower development	645	0.00012	0.012	TraesCS2D02G355900.1	0	0	0	0	0
pistillody-stamen	turquoise	GO:0009908	flower development	645	0.00012	0.012	TraesCS2B02G154100.1	0	0	0	0	0
pistillody-stamen	turquoise	GO:0009908	flower development	645	0.00012	0.012	TraesCS4B02G153500.3	0	0	0	0	0
pistillody-stamen	turquoise	GO:0009908	flower development	645	0.00012	0.012	TraesCS1D02G153700.1	0	0	0	0	0
pistillody-stamen	turquoise	GO:0009908	flower development	645	0.00012	0.012	TraesCS5B02G457600.1	0	0	0	0	0
pistillody-stamen	turquoise	GO:0009908	flower development	645	0.00012	0.012	TraesCS3D02G373200.1	0	0	0	0	0
pistillody-stamen	turquoise	GO:0009908	flower development	645	0.00012	0.012	TraesCS3A02G059200.1	0	0	0	0	0
pistillody-stamen	turquoise	GO:0009908	flower development	645	0.00012	0.012	TraesCS7B02G269400.1	0	0	0	0	0
pistillody-stamen	turquoise	GO:0009908	flower development	645	0.00012	0.012	TraesCS1D02G403100.1	0	0	0	0	0
pistillody-stamen	turquoise	GO:0009908	flower development	645	0.00012	0.012	TraesCS3D02G146900.1	0	0	0	0	0
pistillody-stamen	turquoise	GO:0009908	flower development	645	0.00012	0.012	TraesCS6B02G286400.2	0	0	0	0	0
pistillody-stamen	turquoise	GO:0009908	flower development	645	0.00012	0.012	TraesCS5A02G070700.1	0	0	1	0	0
pistillody-stamen	turquoise	GO:0009908	flower development	645	0.00012	0.012	TraesCS7B02G230200.2	0	0	0	0	0
pistillody-stamen	turquoise	GO:0009908	flower development	645	0.00012	0.012	TraesCS3D02G521900.1	0	0	0	0	0
pistillody-stamen	turquoise	GO:0009908	flower development	645	0.00012	0.012	TraesCS6B02G248400.1	0	0	0	0	0
pistillody-stamen	turquoise	GO:0009908	flower development	645	0.00012	0.012	TraesCS4D02G186200.1	0	0	0	0	0
pistillody-stamen	turquoise	GO:0009908	flower development	645	0.00012	0.012	TraesCS7B02G110600.1	0	0	0	0	0
pistillody-stamen	turquoise	GO:0009908	flower development	645	0.00012	0.012	TraesCS2B02G260800.1	0	0	0	0	0
pistillody-stamen	turquoise	GO:0009908	flower development	645	0.00012	0.012	TraesCS6B02G354900.1	0	0	1	0	0
pistillody-stamen	turquoise	GO:0009908	flower development	645	0.00012	0.012	TraesCS5B02G286100.2	0	0	0	0	0
pistillody-stamen	turquoise	GO:0009908	flower development	645	0.00012	0.012	TraesCS3A02G363900.1	0	0	0	0	0
pistillody-stamen	turquoise	GO:0009908	flower development	645	0.00012	0.012	TraesCS7A02G358300.1	0	0	1	0	0
pistillody-stamen	turquoise	GO:0009908	flower development	645	0.00012	0.012	TraesCS5B02G454200.1	0	0	0	0	0
pistillody-stamen	turquoise	GO:0009908	flower development	645	0.00012	0.012	TraesCS4A02G237600.1	0	0	0	0	0
pistillody-stamen	turquoise	GO:0009908	flower development	645	0.00012	0.012	TraesCS6A02G158100.1	0	0	0	0	0
pistillody-stamen	turquoise	GO:0009908	flower development	645	0.00012	0.012	TraesCS7B02G149200.1	0	0	0	0	0
pistillody-stamen	turquoise	GO:0009908	flower development	645	0.00012	0.012	TraesCS4A02G224800.1	0	0	0	0	0
pistillody-stamen	turquoise	GO:0009908	flower development	645	0.00012	0.012	TraesCS5D02G284200.4	0	0	0	0	0
pistillody-stamen	turquoise	GO:0009908	flower development	645	0.00012	0.012	TraesCS1D02G411200.1	0	0	0	0	0
pistillody-stamen	turquoise	GO:0009908	flower development	645	0.00012	0.012	TraesCS1A02G233800.1	0	0	1	0	0
pistillody-stamen	turquoise	GO:0009908	flower development	645	0.00012	0.012	TraesCS3A02G432500.1	0	0	0	0	0
pistillody-stamen	turquoise	GO:0009908	flower development	645	0.00012	0.012	TraesCS2B02G226900.1	0	0	0	0	0
pistillody-stamen	turquoise	GO:0009908	flower development	645	0.00012	0.012	TraesCS1A02G278700.1	0	0	1	0	0
pistillody-stamen	turquoise	GO:0009908	flower development	645	0.00012	0.012	TraesCS5A02G472100.1	0	0	0	0	0
pistillody-stamen	turquoise	GO:0009908	flower development	645	0.00012	0.012	TraesCS5B02G276400.1	0	0	0	0	0
pistillody-stamen	turquoise	GO:0009908	flower development	645	0.00012	0.012	TraesCS7A02G379000.1	0	0	0	0	0
pistillody-stamen	turquoise	GO:0009908	flower development	645	0.00012	0.012	TraesCS1D02G026200.2	0	0	0	0	0
pistillody-stamen	turquoise	GO:0009908	flower development	645	0.00012	0.012	TraesCS6A02G347500.1	0	0	0	0	0
pistillody-stamen	turquoise	GO:0009908	flower development	645	0.00012	0.012	TraesCS4B02G322200.1	0	0	0	0	0
pistillody-stamen	turquoise	GO:0009908	flower development	645	0.00012	0.012	TraesCS3B02G475600.1	0	0	1	0	0
pistillody-stamen	turquoise	GO:0009908	flower development	645	0.00012	0.012	TraesCS2A02G293600.1	0	0	0	0	0
pistillody-stamen	turquoise	GO:0009908	flower development	645	0.00012	0.012	TraesCS4A02G294900.1	0	0	0	0	0
pistillody-stamen	turquoise	GO:0009908	flower development	645	0.00012	0.012	TraesCS1D02G004900.1	0	0	0	0	0
pistillody-stamen	turquoise	GO:0009908	flower development	645	0.00012	0.012	TraesCS2B02G274800.1	0	0	0	0	0
pistillody-stamen	turquoise	GO:0009908	flower development	645	0.00012	0.012	TraesCS2A02G425200.1	0	0	0	0	0
pistillody-stamen	turquoise	GO:0009908	flower development	645	0.00012	0.012	TraesCS1D02G262500.1	0	0	1	0	0
pistillody-stamen	turquoise	GO:0009908	flower development	645	0.00012	0.012	TraesCS5D02G294400.1	0	0	0	0	0
pistillody-stamen	turquoise	GO:0009908	flower development	645	0.00012	0.012	TraesCS7B02G125000.1	0	0	0	0	0
pistillody-stamen	turquoise	GO:0009908	flower development	645	0.00012	0.012	TraesCS3B02G136600.1	0	0	1	0	0
pistillody-stamen	turquoise	GO:0009908	flower development	645	0.00012	0.012	TraesCS3B02G164500.1	0	0	1	0	0
pistillody-stamen	turquoise	GO:0009908	flower development	645	0.00012	0.012	TraesCS1A02G113600.1	0	0	0	0	0
pistillody-stamen	turquoise	GO:0009908	flower development	645	0.00012	0.012	TraesCS2A02G394700.1	0	0	0	0	0
pistillody-stamen	turquoise	GO:0009908	flower development	645	0.00012	0.012	TraesCS3B02G205900.1	0	0	0	0	0
pistillody-stamen	turquoise	GO:0009908	flower development	645	0.00012	0.012	TraesCS3A02G000300.1	0	0	0	0	0
pistillody-stamen	turquoise	GO:0009908	flower development	645	0.00012	0.012	TraesCS4A02G386600.1	0	0	0	0	0
pistillody-stamen	turquoise	GO:0009908	flower development	645	0.00012	0.012	TraesCS3A02G148400.1	0	0	0	0	0
pistillody-stamen	turquoise	GO:0009908	flower development	645	0.00012	0.012	TraesCS1D02G439600.1	0	0	0	0	0
pistillody-stamen	turquoise	GO:0009908	flower development	645	0.00012	0.012	TraesCS3A02G495400.1	0	0	1	0	0
pistillody-stamen	turquoise	GO:0009908	flower development	645	0.00012	0.012	TraesCS1A02G002700.1	0	0	0	0	0
pistillody-stamen	turquoise	GO:0009908	flower development	645	0.00012	0.012	TraesCS2B02G497500.1	0	0	1	0	0
pistillody-stamen	turquoise	GO:0009908	flower development	645	0.00012	0.012	TraesCS3D02G330400.1	0	0	0	0	0
pistillody-stamen	turquoise	GO:0009908	flower development	645	0.00012	0.012	TraesCS6A02G222300.1	0	0	0	0	0
pistillody-stamen	turquoise	GO:0009908	flower development	645	0.00012	0.012	TraesCS3A02G144000.1	0	0	0	0	0
pistillody-stamen	turquoise	GO:0009908	flower development	645	0.00012	0.012	TraesCS5B02G457300.1	0	0	0	0	0
pistillody-stamen	turquoise	GO:0009908	flower development	645	0.00012	0.012	TraesCS5B02G488200.1	0	0	0	0	0
pistillody-stamen	turquoise	GO:0009908	flower development	645	0.00012	0.012	TraesCS4D02G016400.1	0	0	0	0	0
pistillody-stamen	turquoise	GO:0009908	flower development	645	0.00012	0.012	TraesCS4A02G213000.5	0	0	0	0	0
pistillody-stamen	turquoise	GO:0009908	flower development	645	0.00012	0.012	TraesCS2B02G599600.1	0	0	0	0	0
pistillody-stamen	turquoise	GO:0009908	flower development	645	0.00012	0.012	TraesCS3D02G181900.1	0	0	0	0	0
pistillody-stamen	turquoise	GO:0009908	flower development	645	0.00012	0.012	TraesCS1D02G315400.2	0	0	0	0	0
pistillody-stamen	turquoise	GO:0009908	flower development	645	0.00012	0.012	TraesCS6D02G122400.1	0	0	0	0	0
pistillody-stamen	turquoise	GO:0009908	flower development	645	0.00012	0.012	TraesCS2A02G521400.2	0	0	0	0	0
pistillody-stamen	turquoise	GO:0009908	flower development	645	0.00012	0.012	TraesCS2D02G395000.1	0	0	1	0	0
pistillody-stamen	turquoise	GO:0009908	flower development	645	0.00012	0.012	TraesCS7D02G376400.1	0	0	0	0	0
pistillody-stamen	turquoise	GO:0009908	flower development	645	0.00012	0.012	TraesCS5A02G434500.2	0	0	0	0	0
pistillody-stamen	turquoise	GO:0009908	flower development	645	0.00012	0.012	TraesCS5D02G501400.1	0	0	1	0	0
pistillody-stamen	turquoise	GO:0009908	flower development	645	0.00012	0.012	TraesCS2A02G233300.2	0	0	0	0	0
pistillody-stamen	turquoise	GO:0009908	flower development	645	0.00012	0.012	TraesCS2B02G101700.1	0	0	0	0	0
pistillody-stamen	turquoise	GO:0009908	flower development	645	0.00012	0.012	TraesCS1B02G432600.1	0	0	0	0	0
pistillody-stamen	turquoise	GO:0009908	flower development	645	0.00012	0.012	TraesCS3D02G211100.3	0	0	0	0	0
pistillody-stamen	turquoise	GO:0009908	flower development	645	0.00012	0.012	TraesCS2D02G290600.2	0	0	0	0	0
pistillody-stamen	turquoise	GO:0009908	flower development	645	0.00012	0.012	TraesCS4A02G301900.1	0	0	0	0	0
pistillody-stamen	turquoise	GO:0009908	flower development	645	0.00012	0.012	TraesCS5B02G141600.2	0	0	0	0	0
pistillody-stamen	turquoise	GO:0009908	flower development	645	0.00012	0.012	TraesCS5D02G400100.2	0	0	0	0	0
pistillody-stamen	turquoise	GO:0009908	flower development	645	0.00012	0.012	TraesCS3A02G402300.1	0	0	0	0	0
pistillody-stamen	turquoise	GO:0009908	flower development	645	0.00012	0.012	TraesCS3B02G475800.1	0	0	0	0	0
pistillody-stamen	turquoise	GO:0009908	flower development	645	0.00012	0.012	TraesCS6D02G142900.1	0	0	0	0	0
pistillody-stamen	turquoise	GO:0009908	flower development	645	0.00012	0.012	TraesCS7B02G146100.1	0	0	1	0	0
pistillody-stamen	turquoise	GO:0009908	flower development	645	0.00012	0.012	TraesCS7B02G179000.2	0	0	0	0	0
pistillody-stamen	turquoise	GO:0009908	flower development	645	0.00012	0.012	TraesCS1B02G049300.1	0	0	1	0	0
pistillody-stamen	turquoise	GO:0009908	flower development	645	0.00012	0.012	TraesCS7A02G268900.4	0	0	0	0	0
pistillody-stamen	turquoise	GO:0009908	flower development	645	0.00012	0.012	TraesCS4D02G016900.1	0	0	0	0	0
pistillody-stamen	turquoise	GO:0009908	flower development	645	0.00012	0.012	TraesCS3A02G342300.1	0	0	0	0	0
pistillody-stamen	turquoise	GO:0009908	flower development	645	0.00012	0.012	TraesCS3B02G499800.1	0	0	0	0	0
pistillody-stamen	turquoise	GO:0009908	flower development	645	0.00012	0.012	TraesCS3A02G208100.2	0	0	0	0	0
pistillody-stamen	turquoise	GO:0009908	flower development	645	0.00012	0.012	TraesCS2D02G410700.1	0	0	0	0	0
pistillody-stamen	turquoise	GO:0009908	flower development	645	0.00012	0.012	TraesCS2A02G397200.1	0	0	1	0	0
pistillody-stamen	turquoise	GO:0009908	flower development	645	0.00012	0.012	TraesCS5A02G491400.1	0	0	0	0	0
pistillody-stamen	turquoise	GO:0009908	flower development	645	0.00012	0.012	TraesCS3D02G343100.1	0	0	1	0	0
pistillody-stamen	turquoise	GO:0009908	flower development	645	0.00012	0.012	TraesCS2D02G232300.1	0	0	0	0	0
pistillody-stamen	turquoise	GO:0009908	flower development	645	0.00012	0.012	TraesCS7D02G267500.1	0	0	0	0	0
pistillody-stamen	turquoise	GO:0009908	flower development	645	0.00012	0.012	TraesCS6D02G287800.1	0	0	0	0	0
pistillody-stamen	turquoise	GO:0009908	flower development	645	0.00012	0.012	TraesCS6A02G175800.1	0	0	0	0	0
pistillody-stamen	turquoise	GO:0009908	flower development	645	0.00012	0.012	TraesCS2B02G250900.1	0	0	0	0	0
pistillody-stamen	turquoise	GO:0009908	flower development	645	0.00012	0.012	TraesCS4B02G049800.1	0	0	0	0	0
pistillody-stamen	turquoise	GO:0009908	flower development	645	0.00012	0.012	TraesCS3B02G468400.1	0	0	1	0	0
pistillody-stamen	turquoise	GO:0009908	flower development	645	0.00012	0.012	TraesCS5B02G258900.2	0	0	0	0	0
pistillody-stamen	turquoise	GO:0009908	flower development	645	0.00012	0.012	TraesCS2D02G505400.1	0	0	0	0	0
pistillody-stamen	turquoise	GO:0009908	flower development	645	0.00012	0.012	TraesCS1A02G150900.1	0	0	0	0	0
pistillody-stamen	turquoise	GO:0009908	flower development	645	0.00012	0.012	TraesCS4A02G200700.4	0	0	0	0	0
pistillody-stamen	turquoise	GO:0009908	flower development	645	0.00012	0.012	TraesCS3A02G421400.1	0	0	0	0	0
pistillody-stamen	turquoise	GO:0009908	flower development	645	0.00012	0.012	TraesCS1D02G197300.1	0	0	0	0	0
pistillody-stamen	turquoise	GO:0009908	flower development	645	0.00012	0.012	TraesCS1B02G058600.1	0	0	0	0	0
pistillody-stamen	turquoise	GO:0009908	flower development	645	0.00012	0.012	TraesCS1B02G084500.1	0	0	1	0	0
pistillody-stamen	turquoise	GO:0009908	flower development	645	0.00012	0.012	TraesCS1A02G193400.1	0	0	0	0	0
pistillody-stamen	turquoise	GO:0009908	flower development	645	0.00012	0.012	TraesCS3B02G005900.1	0	0	0	0	0
pistillody-stamen	turquoise	GO:0009908	flower development	645	0.00012	0.012	TraesCS3A02G461400.1	0	0	0	0	0
pistillody-stamen	turquoise	GO:0009908	flower development	645	0.00012	0.012	TraesCS6D02G217400.1	0	0	0	0	0
pistillody-stamen	turquoise	GO:0009908	flower development	645	0.00012	0.012	TraesCS1A02G403200.1	0	0	0	0	0
pistillody-stamen	turquoise	GO:0009908	flower development	645	0.00012	0.012	TraesCS7B02G028200.2	0	0	0	0	0
pistillody-stamen	turquoise	GO:0009908	flower development	645	0.00012	0.012	TraesCS5D02G149200.1	0	0	0	0	0
pistillody-stamen	turquoise	GO:0009908	flower development	645	0.00012	0.012	TraesCS1B02G309800.1	0	0	0	0	0
pistillody-stamen	turquoise	GO:0009908	flower development	645	0.00012	0.012	TraesCS2D02G446600.2	0	0	0	0	0
pistillody-stamen	turquoise	GO:0009908	flower development	645	0.00012	0.012	TraesCS3A02G442000.1	0	0	0	0	0
pistillody-stamen	turquoise	GO:0009908	flower development	645	0.00012	0.012	TraesCS6A02G309600.1	0	0	0	0	0
pistillody-stamen	turquoise	GO:0009908	flower development	645	0.00012	0.012	TraesCS5B02G373300.3	0	0	0	0	0
pistillody-stamen	turquoise	GO:0009908	flower development	645	0.00012	0.012	TraesCS1B02G327100.1	0	0	0	0	0
pistillody-stamen	turquoise	GO:0009908	flower development	645	0.00012	0.012	TraesCS1A02G264000.2	0	0	0	0	0
pistillody-stamen	turquoise	GO:0009908	flower development	645	0.00012	0.012	TraesCS4D02G066700.1	0	0	0	0	0
pistillody-stamen	turquoise	GO:0009908	flower development	645	0.00012	0.012	TraesCS2A02G504700.1	0	0	0	0	0
pistillody-stamen	turquoise	GO:0009908	flower development	645	0.00012	0.012	TraesCS5A02G155100.1	0	0	0	0	0
pistillody-stamen	turquoise	GO:0009908	flower development	645	0.00012	0.012	TraesCS3B02G175300.1	0	0	0	0	0
pistillody-stamen	turquoise	GO:0009908	flower development	645	0.00012	0.012	TraesCS5D02G217700.1	0	0	0	0	0
pistillody-stamen	turquoise	GO:0009908	flower development	645	0.00012	0.012	TraesCS1A02G220300.1	0	0	0	0	0
pistillody-stamen	turquoise	GO:0009908	flower development	645	0.00012	0.012	TraesCS3B02G486000.1	0	0	0	0	0
pistillody-stamen	turquoise	GO:0009908	flower development	645	0.00012	0.012	TraesCS3A02G175600.2	0	0	0	0	0
pistillody-stamen	turquoise	GO:0009908	flower development	645	0.00012	0.012	TraesCS3B02G236500.1	0	0	0	0	0
pistillody-stamen	turquoise	GO:0009908	flower development	645	0.00012	0.012	TraesCS4A02G422700.1	0	0	0	0	0
pistillody-stamen	turquoise	GO:0009908	flower development	645	0.00012	0.012	TraesCS6D02G202000.1	0	0	0	0	0
pistillody-stamen	turquoise	GO:0009908	flower development	645	0.00012	0.012	TraesCS7A02G284900.2	0	0	1	0	0
pistillody-stamen	turquoise	GO:0009908	flower development	645	0.00012	0.012	TraesCS2D02G143000.1	0	0	0	0	0
pistillody-stamen	turquoise	GO:0009908	flower development	645	0.00012	0.012	TraesCS3A02G179200.1	0	0	0	0	0
pistillody-stamen	turquoise	GO:0009908	flower development	645	0.00012	0.012	TraesCS3D02G054400.1	0	0	0	0	0
pistillody-stamen	turquoise	GO:0009908	flower development	645	0.00012	0.012	TraesCS2B02G250000.2	0	0	0	0	0
pistillody-stamen	turquoise	GO:0009908	flower development	645	0.00012	0.012	TraesCS3A02G406200.1	0	0	0	0	0
pistillody-stamen	turquoise	GO:0009908	flower development	645	0.00012	0.012	TraesCS1B02G377100.1	0	0	0	0	0
pistillody-stamen	turquoise	GO:0009908	flower development	645	0.00012	0.012	TraesCS6B02G366700.1	0	0	0	0	0
pistillody-stamen	turquoise	GO:0009908	flower development	645	0.00012	0.012	TraesCS7D02G363200.1	0	0	0	0	0
pistillody-stamen	turquoise	GO:0009908	flower development	645	0.00012	0.012	TraesCS1A02G301800.2	0	0	0	0	0
pistillody-stamen	turquoise	GO:0009908	flower development	645	0.00012	0.012	TraesCS5B02G365800.1	0	0	0	0	0
pistillody-stamen	turquoise	GO:0009908	flower development	645	0.00012	0.012	TraesCS1B02G474800.1	0	0	0	0	0
pistillody-stamen	turquoise	GO:0009908	flower development	645	0.00012	0.012	TraesCS7D02G263400.1	0	0	0	0	0
pistillody-stamen	turquoise	GO:0009908	flower development	645	0.00012	0.012	TraesCS2B02G258400.2	0	0	0	0	0
pistillody-stamen	turquoise	GO:0009908	flower development	645	0.00012	0.012	TraesCS3D02G008800.1	0	0	0	0	0
pistillody-stamen	turquoise	GO:0009908	flower development	645	0.00012	0.012	TraesCS1A02G227300.1	0	0	0	0	0
pistillody-stamen	turquoise	GO:0009908	flower development	645	0.00012	0.012	TraesCS2A02G104100.1	0	0	0	0	0
pistillody-stamen	turquoise	GO:0009908	flower development	645	0.00012	0.012	TraesCS5B02G207400.1	0	0	0	0	0
pistillody-stamen	turquoise	GO:0009908	flower development	645	0.00012	0.012	TraesCS7B02G152800.1	0	0	0	0	0
pistillody-stamen	turquoise	GO:0009908	flower development	645	0.00012	0.012	TraesCS3D02G192400.1	0	0	0	0	0
pistillody-stamen	turquoise	GO:0009908	flower development	645	0.00012	0.012	TraesCS6A02G335900.1	0	0	0	0	0
pistillody-stamen	turquoise	GO:0009908	flower development	645	0.00012	0.012	TraesCS2D02G178300.1	0	0	0	0	0
pistillody-stamen	turquoise	GO:0009908	flower development	645	0.00012	0.012	TraesCS7A02G529600.1	0	0	0	0	0
pistillody-stamen	turquoise	GO:0009908	flower development	645	0.00012	0.012	TraesCS7B02G468100.3	0	0	0	0	0
pistillody-stamen	turquoise	GO:0009908	flower development	645	0.00012	0.012	TraesCS2A02G413900.1	0	0	0	0	0
pistillody-stamen	turquoise	GO:0009908	flower development	645	0.00012	0.012	TraesCS5A02G533800.3	0	0	0	0	0
pistillody-stamen	turquoise	GO:0009908	flower development	645	0.00012	0.012	TraesCS3B02G476000.1	0	0	1	0	0
pistillody-stamen	turquoise	GO:0009908	flower development	645	0.00012	0.012	TraesCS2D02G199900.1	0	0	1	0	0
pistillody-stamen	turquoise	GO:0009908	flower development	645	0.00012	0.012	TraesCS7B02G324500.1	0	0	0	0	0
pistillody-stamen	turquoise	GO:0009908	flower development	645	0.00012	0.012	TraesCS4D02G318800.1	0	0	0	0	0
pistillody-stamen	turquoise	GO:0009908	flower development	645	0.00012	0.012	TraesCS2A02G268500.1	0	0	0	0	0
pistillody-stamen	turquoise	GO:0009908	flower development	645	0.00012	0.012	TraesCS7A02G478100.1	0	0	0	0	0
pistillody-stamen	turquoise	GO:0009908	flower development	645	0.00012	0.012	TraesCS3B02G142300.3	0	0	0	0	0
pistillody-stamen	turquoise	GO:0009908	flower development	645	0.00012	0.012	TraesCS5A02G304900.1	0	0	0	0	0
pistillody-stamen	turquoise	GO:0009908	flower development	645	0.00012	0.012	TraesCS7A02G256200.1	0	0	0	0	0
pistillody-stamen	turquoise	GO:0009908	flower development	645	0.00012	0.012	TraesCS5B02G172800.1	0	0	0	0	0
pistillody-stamen	turquoise	GO:0009908	flower development	645	0.00012	0.012	TraesCS4A02G016600.1	0	0	1	0	0
pistillody-stamen	turquoise	GO:0009908	flower development	645	0.00012	0.012	TraesCS6A02G259000.1	0	0	0	0	0
pistillody-stamen	turquoise	GO:0009908	flower development	645	0.00012	0.012	TraesCS3D02G442000.1	0	0	0	0	0
pistillody-stamen	turquoise	GO:0009908	flower development	645	0.00012	0.012	TraesCS2A02G346000.1	0	0	0	0	0
pistillody-stamen	turquoise	GO:0009908	flower development	645	0.00012	0.012	TraesCS3D02G163600.1	0	0	0	0	0
pistillody-stamen	turquoise	GO:0009908	flower development	645	0.00012	0.012	TraesCS7D02G271400.1	0	0	0	0	0
pistillody-stamen	turquoise	GO:0009908	flower development	645	0.00012	0.012	TraesCS3D02G357400.1	0	0	0	0	0
pistillody-stamen	turquoise	GO:0009908	flower development	645	0.00012	0.012	TraesCS6A02G234800.1	0	0	0	0	0
pistillody-stamen	turquoise	GO:0009908	flower development	645	0.00012	0.012	TraesCS4B02G234600.1	0	0	0	0	0
pistillody-stamen	turquoise	GO:0009908	flower development	645	0.00012	0.012	TraesCS1A02G103100.1	0	0	0	0	0
pistillody-stamen	turquoise	GO:0009908	flower development	645	0.00012	0.012	TraesCS7A02G245400.1	0	0	0	0	0
pistillody-stamen	turquoise	GO:0009908	flower development	645	0.00012	0.012	TraesCS3A02G441700.1	0	0	1	0	0
pistillody-stamen	turquoise	GO:0009908	flower development	645	0.00012	0.012	TraesCS5A02G134700.2	0	0	1	0	0
pistillody-stamen	turquoise	GO:0009908	flower development	645	0.00012	0.012	TraesCS4B02G018200.1	0	0	0	0	0
pistillody-stamen	turquoise	GO:0009908	flower development	645	0.00012	0.012	TraesCS5D02G093100.1	0	0	0	0	0
pistillody-stamen	turquoise	GO:0009908	flower development	645	0.00012	0.012	TraesCS7B02G437100.1	0	0	0	0	0
pistillody-stamen	turquoise	GO:0009908	flower development	645	0.00012	0.012	TraesCS1D02G354500.2	0	0	1	0	0
pistillody-stamen	turquoise	GO:0009908	flower development	645	0.00012	0.012	TraesCS3A02G536300.1	0	0	0	0	0
pistillody-stamen	turquoise	GO:0009908	flower development	645	0.00012	0.012	TraesCS5B02G382300.1	0	0	0	0	0
pistillody-stamen	turquoise	GO:0009908	flower development	645	0.00012	0.012	TraesCS3D02G434700.1	0	0	0	0	0
pistillody-stamen	turquoise	GO:0009908	flower development	645	0.00012	0.012	TraesCS4B02G029100.1	0	0	0	0	0
pistillody-stamen	turquoise	GO:0009908	flower development	645	0.00012	0.012	TraesCS6D02G248300.1	0	0	0	0	0
pistillody-stamen	turquoise	GO:0009908	flower development	645	0.00012	0.012	TraesCS2D02G267500.1	0	0	0	0	0
pistillody-stamen	turquoise	GO:0009908	flower development	645	0.00012	0.012	TraesCS1B02G149600.1	0	0	1	0	0
pistillody-stamen	turquoise	GO:0009908	flower development	645	0.00012	0.012	TraesCS3B02G336100.1	0	0	0	0	0
pistillody-stamen	turquoise	GO:0009908	flower development	645	0.00012	0.012	TraesCS5D02G045700.1	0	0	0	0	0
pistillody-stamen	turquoise	GO:0009908	flower development	645	0.00012	0.012	TraesCS1B02G144800.3	0	0	0	0	0
pistillody-stamen	turquoise	GO:0009908	flower development	645	0.00012	0.012	TraesCS4A02G430600.1	0	0	1	0	0
pistillody-stamen	turquoise	GO:0009908	flower development	645	0.00012	0.012	TraesCS3B02G086700.1	0	0	0	0	0
pistillody-stamen	turquoise	GO:0009908	flower development	645	0.00012	0.012	TraesCS1B02G273000.2	0	0	1	0	0
pistillody-stamen	turquoise	GO:0009908	flower development	645	0.00012	0.012	TraesCS6A02G242800.1	0	0	1	0	0
pistillody-stamen	turquoise	GO:0009908	flower development	645	0.00012	0.012	TraesCS7D02G155100.1	0	0	0	0	0
pistillody-stamen	turquoise	GO:0009908	flower development	645	0.00012	0.012	TraesCS7D02G168700.1	0	0	0	0	0
pistillody-stamen	turquoise	GO:0009908	flower development	645	0.00012	0.012	TraesCS3D02G425800.1	0	0	1	0	0
pistillody-stamen	turquoise	GO:0009908	flower development	645	0.00012	0.012	TraesCS4A02G180700.1	0	0	0	0	0
pistillody-stamen	turquoise	GO:0009908	flower development	645	0.00012	0.012	TraesCS7B02G169200.1	0	0	0	0	0
pistillody-stamen	turquoise	GO:0009908	flower development	645	0.00012	0.012	TraesCS3D02G156100.1	0	0	0	0	0
pistillody-stamen	turquoise	GO:0009908	flower development	645	0.00012	0.012	TraesCS3B02G273900.1	0	0	0	0	0
pistillody-stamen	turquoise	GO:0009908	flower development	645	0.00012	0.012	TraesCS1B02G270400.1	0	0	0	0	0
pistillody-stamen	turquoise	GO:0009908	flower development	645	0.00012	0.012	TraesCS1A02G176300.1	0	0	0	0	0
pistillody-stamen	turquoise	GO:0009908	flower development	645	0.00012	0.012	TraesCS6B02G160900.1	0	0	0	0	0
pistillody-stamen	turquoise	GO:0009908	flower development	645	0.00012	0.012	TraesCS1D02G337400.1	0	0	0	0	0
pistillody-stamen	turquoise	GO:0009908	flower development	645	0.00012	0.012	TraesCS3D02G273800.2	0	0	0	0	0
pistillody-stamen	turquoise	GO:0009908	flower development	645	0.00012	0.012	TraesCS4D02G239400.1	0	0	0	0	0
pistillody-stamen	turquoise	GO:0009908	flower development	645	0.00012	0.012	TraesCS4D02G101500.1	0	0	0	0	0
pistillody-stamen	turquoise	GO:0009908	flower development	645	0.00012	0.012	TraesCS7A02G203600.1	0	0	0	0	0
pistillody-stamen	turquoise	GO:0009908	flower development	645	0.00012	0.012	TraesCS4D02G117300.1	0	0	0	0	0
pistillody-stamen	turquoise	GO:0009908	flower development	645	0.00012	0.012	TraesCS5B02G543400.1	0	0	0	0	0
pistillody-stamen	turquoise	GO:0009908	flower development	645	0.00012	0.012	TraesCS5B02G231300.1	0	0	0	0	0
pistillody-stamen	turquoise	GO:0009908	flower development	645	0.00012	0.012	TraesCS2B02G277900.1	0	0	0	0	0
pistillody-stamen	turquoise	GO:0009908	flower development	645	0.00012	0.012	TraesCS3A02G009400.2	0	0	0	0	0
pistillody-stamen	turquoise	GO:0009908	flower development	645	0.00012	0.012	TraesCS2A02G268300.1	0	0	0	0	0
pistillody-stamen	turquoise	GO:0009908	flower development	645	0.00012	0.012	TraesCS7A02G083800.1	0	0	0	0	0
pistillody-stamen	turquoise	GO:0009908	flower development	645	0.00012	0.012	TraesCS1D02G134100.1	0	0	0	0	0
pistillody-stamen	turquoise	GO:0009908	flower development	645	0.00012	0.012	TraesCS2B02G287300.1	0	0	1	0	0
pistillody-stamen	turquoise	GO:0009908	flower development	645	0.00012	0.012	TraesCS1D02G099600.1	0	0	1	0	0
pistillody-stamen	turquoise	GO:0009908	flower development	645	0.00012	0.012	TraesCS6A02G255800.1	0	0	0	0	0
pistillody-stamen	turquoise	GO:0009908	flower development	645	0.00012	0.012	TraesCS3D02G093300.1	0	0	0	0	0
pistillody-stamen	turquoise	GO:0009908	flower development	645	0.00012	0.012	TraesCS3D02G072300.1	0	0	0	0	0
pistillody-stamen	turquoise	GO:0009908	flower development	645	0.00012	0.012	TraesCS7D02G400000.1	0	0	0	0	0
pistillody-stamen	turquoise	GO:0009908	flower development	645	0.00012	0.012	TraesCS1A02G262400.1	0	0	0	0	0
pistillody-stamen	turquoise	GO:0009908	flower development	645	0.00012	0.012	TraesCS3B02G040200.1	0	0	0	0	0
pistillody-stamen	turquoise	GO:0009908	flower development	645	0.00012	0.012	TraesCS7D02G305200.2	0	0	1	0	0
pistillody-stamen	turquoise	GO:0009908	flower development	645	0.00012	0.012	TraesCS3B02G308300.2	0	0	0	0	0
pistillody-stamen	turquoise	GO:0009908	flower development	645	0.00012	0.012	TraesCS2A02G224600.1	0	0	0	0	0
pistillody-stamen	turquoise	GO:0009908	flower development	645	0.00012	0.012	TraesCS7D02G478800.1	0	0	0	0	0
pistillody-stamen	turquoise	GO:0009908	flower development	645	0.00012	0.012	TraesCS4A02G058800.1	0	0	0	0	0
pistillody-stamen	turquoise	GO:0009908	flower development	645	0.00012	0.012	TraesCS3A02G349200.1	0	0	1	0	0
pistillody-stamen	turquoise	GO:0009908	flower development	645	0.00012	0.012	TraesCS6B02G372100.1	0	0	0	0	0
pistillody-stamen	turquoise	GO:0009908	flower development	645	0.00012	0.012	TraesCS3A02G229500.1	0	0	0	0	0
pistillody-stamen	turquoise	GO:0009908	flower development	645	0.00012	0.012	TraesCS2B02G415500.1	0	0	1	0	0
pistillody-stamen	turquoise	GO:0009908	flower development	645	0.00012	0.012	TraesCS1A02G360700.2	0	0	0	0	0
pistillody-stamen	turquoise	GO:0009908	flower development	645	0.00012	0.012	TraesCS4A02G199300.1	0	0	0	0	0
pistillody-stamen	turquoise	GO:0009908	flower development	645	0.00012	0.012	TraesCS1B02G203800.1	0	0	0	0	0
pistillody-stamen	turquoise	GO:0009908	flower development	645	0.00012	0.012	TraesCS4A02G059000.1	0	0	1	0	0
pistillody-stamen	turquoise	GO:0009908	flower development	645	0.00012	0.012	TraesCS1D02G228900.1	0	0	0	0	0
pistillody-stamen	turquoise	GO:0009908	flower development	645	0.00012	0.012	TraesCS1D02G268400.1	0	0	0	0	0
pistillody-stamen	turquoise	GO:0009908	flower development	645	0.00012	0.012	TraesCS5A02G286800.1	0	0	0	0	0
pistillody-stamen	turquoise	GO:0009908	flower development	645	0.00012	0.012	TraesCS2A02G330000.1	0	0	0	0	0
pistillody-stamen	turquoise	GO:0009908	flower development	645	0.00012	0.012	TraesCS5A02G319200.1	0	0	0	0	0
pistillody-stamen	turquoise	GO:0009908	flower development	645	0.00012	0.012	TraesCS5D02G007200.1	0	0	0	0	0
pistillody-stamen	turquoise	GO:0009908	flower development	645	0.00012	0.012	TraesCS7D02G335200.1	0	0	1	0	0
pistillody-stamen	turquoise	GO:0009908	flower development	645	0.00012	0.012	TraesCS7D02G291200.3	0	0	1	0	0
pistillody-stamen	turquoise	GO:0009908	flower development	645	0.00012	0.012	TraesCS3A02G245700.2	0	0	0	0	0
pistillody-stamen	turquoise	GO:0009908	flower development	645	0.00012	0.012	TraesCS6A02G163400.1	0	0	0	0	0
pistillody-stamen	turquoise	GO:0009908	flower development	645	0.00012	0.012	TraesCS7A02G459400.1	0	0	0	0	0
pistillody-stamen	turquoise	GO:0009908	flower development	645	0.00012	0.012	TraesCS3B02G315900.1	0	0	0	0	0
pistillody-stamen	turquoise	GO:0009908	flower development	645	0.00012	0.012	TraesCS5A02G121100.1	0	0	0	0	0
pistillody-stamen	turquoise	GO:0009908	flower development	645	0.00012	0.012	TraesCS7D02G313000.1	0	0	1	0	0
pistillody-stamen	turquoise	GO:0009908	flower development	645	0.00012	0.012	TraesCS7D02G053600.1	0	0	0	0	0
pistillody-stamen	turquoise	GO:0009908	flower development	645	0.00012	0.012	TraesCS3D02G072400.1	0	0	1	0	0
pistillody-stamen	turquoise	GO:0009908	flower development	645	0.00012	0.012	TraesCS5A02G516600.1	0	0	1	0	0
pistillody-stamen	turquoise	GO:0009908	flower development	645	0.00012	0.012	TraesCS3A02G208200.1	0	0	0	0	0
pistillody-stamen	turquoise	GO:0009908	flower development	645	0.00012	0.012	TraesCS1B02G208400.1	0	0	0	0	0
pistillody-stamen	turquoise	GO:0009908	flower development	645	0.00012	0.012	TraesCS7A02G476700.1	0	0	0	0	0
pistillody-stamen	turquoise	GO:0009908	flower development	645	0.00012	0.012	TraesCS5A02G038300.1	0	0	0	0	0
pistillody-stamen	turquoise	GO:0009908	flower development	645	0.00012	0.012	TraesCS7D02G060400.1	0	0	0	0	0
pistillody-stamen	turquoise	GO:0009908	flower development	645	0.00012	0.012	TraesCS1A02G439500.1	0	0	0	0	0
pistillody-stamen	turquoise	GO:0009908	flower development	645	0.00012	0.012	TraesCS7B02G267900.1	0	0	1	0	0
pistillody-stamen	turquoise	GO:0009908	flower development	645	0.00012	0.012	TraesCS6A02G191200.1	0	0	0	0	0
pistillody-stamen	turquoise	GO:0009908	flower development	645	0.00012	0.012	TraesCS6B02G337300.1	0	0	0	0	0
pistillody-stamen	turquoise	GO:0009908	flower development	645	0.00012	0.012	TraesCS4A02G121300.4	0	0	0	0	0
pistillody-stamen	turquoise	GO:0009908	flower development	645	0.00012	0.012	TraesCS3B02G162500.2	0	0	0	0	0
pistillody-stamen	turquoise	GO:0009908	flower development	645	0.00012	0.012	TraesCS2A02G357100.1	0	0	0	0	0
pistillody-stamen	turquoise	GO:0009908	flower development	645	0.00012	0.012	TraesCS6B02G263500.1	0	0	0	0	0
pistillody-stamen	turquoise	GO:0009908	flower development	645	0.00012	0.012	TraesCS1D02G127700.1	0	0	0	0	0
pistillody-stamen	turquoise	GO:0009908	flower development	645	0.00012	0.012	TraesCS2D02G207200.1	0	0	0	0	0
pistillody-stamen	turquoise	GO:0009908	flower development	645	0.00012	0.012	TraesCS5D02G139600.1	0	0	1	0	0
pistillody-stamen	turquoise	GO:0009908	flower development	645	0.00012	0.012	TraesCS2D02G160000.1	0	0	1	0	0
pistillody-stamen	turquoise	GO:0009908	flower development	645	0.00012	0.012	TraesCS2D02G516300.2	0	0	0	0	0
pistillody-stamen	turquoise	GO:0009908	flower development	645	0.00012	0.012	TraesCS7A02G066200.1	0	0	0	0	0
pistillody-stamen	turquoise	GO:0009908	flower development	645	0.00012	0.012	TraesCS3B02G501600.1	0	0	0	0	0
pistillody-stamen	turquoise	GO:0009908	flower development	645	0.00012	0.012	TraesCS5D02G172300.2	0	0	0	0	0
pistillody-stamen	turquoise	GO:0009908	flower development	645	0.00012	0.012	TraesCS7A02G294500.5	0	0	0	0	0
pistillody-stamen	turquoise	GO:0009908	flower development	645	0.00012	0.012	TraesCS3A02G298400.4	0	0	0	0	0
pistillody-stamen	turquoise	GO:0009908	flower development	645	0.00012	0.012	TraesCS6D02G304300.1	0	0	1	0	0
pistillody-stamen	turquoise	GO:0009908	flower development	645	0.00012	0.012	TraesCS2B02G121100.1	0	0	0	0	0
pistillody-stamen	turquoise	GO:0009908	flower development	645	0.00012	0.012	TraesCS7D02G241100.1	0	0	0	0	0
pistillody-stamen	turquoise	GO:0009908	flower development	645	0.00012	0.012	TraesCS5D02G044800.1	0	0	0	0	0
pistillody-stamen	turquoise	GO:0009908	flower development	645	0.00012	0.012	TraesCS5D02G278500.1	0	0	0	0	0
pistillody-stamen	turquoise	GO:0009908	flower development	645	0.00012	0.012	TraesCS5D02G082800.1	0	0	0	0	0
pistillody-stamen	turquoise	GO:0009908	flower development	645	0.00012	0.012	TraesCS1B02G241400.1	0	0	0	0	0
pistillody-stamen	turquoise	GO:0009908	flower development	645	0.00012	0.012	TraesCS6D02G116300.1	0	0	0	0	0
pistillody-stamen	turquoise	GO:0009908	flower development	645	0.00012	0.012	TraesCS1D02G053300.1	0	0	0	0	0
pistillody-stamen	turquoise	GO:0009908	flower development	645	0.00012	0.012	TraesCS6D02G289000.1	0	0	0	0	0
pistillody-stamen	turquoise	GO:0009908	flower development	645	0.00012	0.012	TraesCS2D02G263500.1	0	0	0	0	0
pistillody-stamen	turquoise	GO:0009908	flower development	645	0.00012	0.012	TraesCS6B02G235800.1	0	0	0	0	0
pistillody-stamen	turquoise	GO:0009908	flower development	645	0.00012	0.012	TraesCS4D02G339400.1	0	0	0	0	0
pistillody-stamen	turquoise	GO:0009908	flower development	645	0.00012	0.012	TraesCS1D02G246700.1	0	0	0	0	0
pistillody-stamen	turquoise	GO:0009908	flower development	645	0.00012	0.012	TraesCS3A02G072600.1	0	0	0	0	0
pistillody-stamen	turquoise	GO:0009908	flower development	645	0.00012	0.012	TraesCS7B02G206700.1	0	0	0	0	0
pistillody-stamen	turquoise	GO:0009908	flower development	645	0.00012	0.012	TraesCS5D02G167800.1	0	0	0	0	0
pistillody-stamen	turquoise	GO:0009908	flower development	645	0.00012	0.012	TraesCS4B02G230800.1	0	0	0	0	0
pistillody-stamen	turquoise	GO:0009908	flower development	645	0.00012	0.012	TraesCS5A02G361500.1	0	0	0	0	0
pistillody-stamen	turquoise	GO:0009908	flower development	645	0.00012	0.012	TraesCS1D02G262700.1	0	0	0	0	0
pistillody-stamen	turquoise	GO:0048467	gynoecium development	206	4e-05	0.0048	TraesCS1B02G273300.1	0	0	0	0	0
pistillody-stamen	turquoise	GO:0048467	gynoecium development	206	4e-05	0.0048	TraesCS1A02G301800.2	0	0	0	0	0
pistillody-stamen	turquoise	GO:0048467	gynoecium development	206	4e-05	0.0048	TraesCS1B02G377100.1	0	0	0	0	0
pistillody-stamen	turquoise	GO:0048467	gynoecium development	206	4e-05	0.0048	TraesCS5A02G370200.1	0	0	0	0	0
pistillody-stamen	turquoise	GO:0048467	gynoecium development	206	4e-05	0.0048	TraesCS7D02G363200.1	0	0	0	0	0
pistillody-stamen	turquoise	GO:0048467	gynoecium development	206	4e-05	0.0048	TraesCS2B02G138400.1	0	0	0	0	0
pistillody-stamen	turquoise	GO:0048467	gynoecium development	206	4e-05	0.0048	TraesCS5B02G563900.2	0	0	1	0	0
pistillody-stamen	turquoise	GO:0048467	gynoecium development	206	4e-05	0.0048	TraesCS2A02G344300.1	0	0	0	0	0
pistillody-stamen	turquoise	GO:0048467	gynoecium development	206	4e-05	0.0048	TraesCS7D02G263400.1	0	0	0	0	0
pistillody-stamen	turquoise	GO:0048467	gynoecium development	206	4e-05	0.0048	TraesCS2B02G258400.2	0	0	0	0	0
pistillody-stamen	turquoise	GO:0048467	gynoecium development	206	4e-05	0.0048	TraesCS5A02G402800.1	0	0	0	0	0
pistillody-stamen	turquoise	GO:0048467	gynoecium development	206	4e-05	0.0048	TraesCS3B02G607600.1	0	0	0	0	0
pistillody-stamen	turquoise	GO:0048467	gynoecium development	206	4e-05	0.0048	TraesCS7D02G244000.1	0	0	1	0	0
pistillody-stamen	turquoise	GO:0048467	gynoecium development	206	4e-05	0.0048	TraesCS2A02G104100.1	0	0	0	0	0
pistillody-stamen	turquoise	GO:0048467	gynoecium development	206	4e-05	0.0048	TraesCS3D02G497300.1	0	0	0	0	0
pistillody-stamen	turquoise	GO:0048467	gynoecium development	206	4e-05	0.0048	TraesCS7A02G308400.1	0	0	1	0	0
pistillody-stamen	turquoise	GO:0048467	gynoecium development	206	4e-05	0.0048	TraesCS5B02G319600.1	0	0	0	0	0
pistillody-stamen	turquoise	GO:0048467	gynoecium development	206	4e-05	0.0048	TraesCS6B02G181300.1	0	0	0	0	0
pistillody-stamen	turquoise	GO:0048467	gynoecium development	206	4e-05	0.0048	TraesCS3B02G374400.1	0	0	0	0	0
pistillody-stamen	turquoise	GO:0048467	gynoecium development	206	4e-05	0.0048	TraesCS5A02G263600.1	0	0	0	0	0
pistillody-stamen	turquoise	GO:0048467	gynoecium development	206	4e-05	0.0048	TraesCS1A02G444500.1	0	0	0	0	0
pistillody-stamen	turquoise	GO:0048467	gynoecium development	206	4e-05	0.0048	TraesCS2D02G523100.2	0	0	0	0	0
pistillody-stamen	turquoise	GO:0048467	gynoecium development	206	4e-05	0.0048	TraesCS2A02G232400.1	0	0	0	0	0
pistillody-stamen	turquoise	GO:0048467	gynoecium development	206	4e-05	0.0048	TraesCS1B02G473400.1	0	0	0	0	0
pistillody-stamen	turquoise	GO:0048467	gynoecium development	206	4e-05	0.0048	TraesCS6D02G278700.1	0	0	0	0	0
pistillody-stamen	turquoise	GO:0048467	gynoecium development	206	4e-05	0.0048	TraesCS5B02G115100.1	0	0	0	0	0
pistillody-stamen	turquoise	GO:0048467	gynoecium development	206	4e-05	0.0048	TraesCS7A02G293300.3	0	0	0	0	0
pistillody-stamen	turquoise	GO:0048467	gynoecium development	206	4e-05	0.0048	TraesCS2D02G199900.1	0	0	1	0	0
pistillody-stamen	turquoise	GO:0048467	gynoecium development	206	4e-05	0.0048	TraesCS7B02G324500.1	0	0	0	0	0
pistillody-stamen	turquoise	GO:0048467	gynoecium development	206	4e-05	0.0048	TraesCS7D02G416400.1	0	0	1	0	0
pistillody-stamen	turquoise	GO:0048467	gynoecium development	206	4e-05	0.0048	TraesCS7D02G284100.1	0	0	0	0	0
pistillody-stamen	turquoise	GO:0048467	gynoecium development	206	4e-05	0.0048	TraesCS4A02G133800.1	0	0	0	0	0
pistillody-stamen	turquoise	GO:0048467	gynoecium development	206	4e-05	0.0048	TraesCS3D02G219500.1	0	0	0	0	0
pistillody-stamen	turquoise	GO:0048467	gynoecium development	206	4e-05	0.0048	TraesCS3A02G093000.1	0	0	0	0	0
pistillody-stamen	turquoise	GO:0048467	gynoecium development	206	4e-05	0.0048	TraesCS2D02G418800.1	0	0	0	0	0
pistillody-stamen	turquoise	GO:0048467	gynoecium development	206	4e-05	0.0048	TraesCS1A02G236900.2	0	0	0	0	0
pistillody-stamen	turquoise	GO:0048467	gynoecium development	206	4e-05	0.0048	TraesCS3D02G336200.1	0	0	0	0	0
pistillody-stamen	turquoise	GO:0048467	gynoecium development	206	4e-05	0.0048	TraesCS4A02G016600.1	0	0	1	0	0
pistillody-stamen	turquoise	GO:0048467	gynoecium development	206	4e-05	0.0048	TraesCS6A02G259000.1	0	0	0	0	0
pistillody-stamen	turquoise	GO:0048467	gynoecium development	206	4e-05	0.0048	TraesCS1D02G365100.1	0	0	0	0	0
pistillody-stamen	turquoise	GO:0048467	gynoecium development	206	4e-05	0.0048	TraesCS3D02G442000.1	0	0	0	0	0
pistillody-stamen	turquoise	GO:0048467	gynoecium development	206	4e-05	0.0048	TraesCS7D02G271400.1	0	0	0	0	0
pistillody-stamen	turquoise	GO:0048467	gynoecium development	206	4e-05	0.0048	TraesCS5D02G325400.2	0	0	0	0	0
pistillody-stamen	turquoise	GO:0048467	gynoecium development	206	4e-05	0.0048	TraesCS1A02G225100.1	0	0	0	0	0
pistillody-stamen	turquoise	GO:0048467	gynoecium development	206	4e-05	0.0048	TraesCS3D02G357400.1	0	0	0	0	0
pistillody-stamen	turquoise	GO:0048467	gynoecium development	206	4e-05	0.0048	TraesCS2B02G154100.1	0	0	0	0	0
pistillody-stamen	turquoise	GO:0048467	gynoecium development	206	4e-05	0.0048	TraesCS2A02G422400.1	0	0	0	0	0
pistillody-stamen	turquoise	GO:0048467	gynoecium development	206	4e-05	0.0048	TraesCS4D02G233200.1	0	0	0	0	0
pistillody-stamen	turquoise	GO:0048467	gynoecium development	206	4e-05	0.0048	TraesCS5D02G294500.1	0	0	0	0	0
pistillody-stamen	turquoise	GO:0048467	gynoecium development	206	4e-05	0.0048	TraesCS5D02G550700.1	0	0	1	0	0
pistillody-stamen	turquoise	GO:0048467	gynoecium development	206	4e-05	0.0048	TraesCS7A02G270900.1	0	0	0	0	0
pistillody-stamen	turquoise	GO:0048467	gynoecium development	206	4e-05	0.0048	TraesCS3A02G441700.1	0	0	1	0	0
pistillody-stamen	turquoise	GO:0048467	gynoecium development	206	4e-05	0.0048	TraesCS5A02G390300.2	0	0	0	0	0
pistillody-stamen	turquoise	GO:0048467	gynoecium development	206	4e-05	0.0048	TraesCS4B02G064000.1	0	0	0	0	0
pistillody-stamen	turquoise	GO:0048467	gynoecium development	206	4e-05	0.0048	TraesCS7B02G437100.1	0	0	0	0	0
pistillody-stamen	turquoise	GO:0048467	gynoecium development	206	4e-05	0.0048	TraesCS7A02G404400.1	0	0	0	0	0
pistillody-stamen	turquoise	GO:0048467	gynoecium development	206	4e-05	0.0048	TraesCS3A02G536300.1	0	0	0	0	0
pistillody-stamen	turquoise	GO:0048467	gynoecium development	206	4e-05	0.0048	TraesCS1D02G346800.1	0	0	0	0	0
pistillody-stamen	turquoise	GO:0048467	gynoecium development	206	4e-05	0.0048	TraesCS3D02G146900.1	0	0	0	0	0
pistillody-stamen	turquoise	GO:0048467	gynoecium development	206	4e-05	0.0048	TraesCS6B02G286400.2	0	0	0	0	0
pistillody-stamen	turquoise	GO:0048467	gynoecium development	206	4e-05	0.0048	TraesCS1A02G227300.1	0	0	0	0	0
pistillody-stamen	turquoise	GO:0048467	gynoecium development	206	4e-05	0.0048	TraesCS7B02G303300.1	0	0	0	0	0
pistillody-stamen	turquoise	GO:0048467	gynoecium development	206	4e-05	0.0048	TraesCS3D02G434700.1	0	0	0	0	0
pistillody-stamen	turquoise	GO:0048467	gynoecium development	206	4e-05	0.0048	TraesCS2B02G550700.1	0	0	0	0	0
pistillody-stamen	turquoise	GO:0048467	gynoecium development	206	4e-05	0.0048	TraesCS6D02G248300.1	0	0	0	0	0
pistillody-stamen	turquoise	GO:0048467	gynoecium development	206	4e-05	0.0048	TraesCS1B02G479300.1	0	0	1	0	0
pistillody-stamen	turquoise	GO:0048467	gynoecium development	206	4e-05	0.0048	TraesCS4D02G186200.1	0	0	0	0	0
pistillody-stamen	turquoise	GO:0048467	gynoecium development	206	4e-05	0.0048	TraesCS2A02G243300.4	0	0	0	0	0
pistillody-stamen	turquoise	GO:0048467	gynoecium development	206	4e-05	0.0048	TraesCS2A02G346000.1	0	0	0	0	0
pistillody-stamen	turquoise	GO:0048467	gynoecium development	206	4e-05	0.0048	TraesCS1B02G144800.3	0	0	0	0	0
pistillody-stamen	turquoise	GO:0048467	gynoecium development	206	4e-05	0.0048	TraesCS5B02G286100.2	0	0	0	0	0
pistillody-stamen	turquoise	GO:0048467	gynoecium development	206	4e-05	0.0048	TraesCS3A02G363900.1	0	0	0	0	0
pistillody-stamen	turquoise	GO:0048467	gynoecium development	206	4e-05	0.0048	TraesCS5B02G454200.1	0	0	0	0	0
pistillody-stamen	turquoise	GO:0048467	gynoecium development	206	4e-05	0.0048	TraesCS3D02G091000.2	0	0	0	0	0
pistillody-stamen	turquoise	GO:0048467	gynoecium development	206	4e-05	0.0048	TraesCS6A02G158100.1	0	0	0	0	0
pistillody-stamen	turquoise	GO:0048467	gynoecium development	206	4e-05	0.0048	TraesCS2B02G219300.1	0	0	1	0	0
pistillody-stamen	turquoise	GO:0048467	gynoecium development	206	4e-05	0.0048	TraesCS4A02G119800.1	0	0	1	0	0
pistillody-stamen	turquoise	GO:0048467	gynoecium development	206	4e-05	0.0048	TraesCS4B02G234600.1	0	0	0	0	0
pistillody-stamen	turquoise	GO:0048467	gynoecium development	206	4e-05	0.0048	TraesCS3D02G191600.4	0	0	1	0	0
pistillody-stamen	turquoise	GO:0048467	gynoecium development	206	4e-05	0.0048	TraesCS1A02G072200.1	0	0	0	0	0
pistillody-stamen	turquoise	GO:0048467	gynoecium development	206	4e-05	0.0048	TraesCS1A02G233800.1	0	0	1	0	0
pistillody-stamen	turquoise	GO:0048467	gynoecium development	206	4e-05	0.0048	TraesCS7B02G169200.1	0	0	0	0	0
pistillody-stamen	turquoise	GO:0048467	gynoecium development	206	4e-05	0.0048	TraesCS3D02G156100.1	0	0	0	0	0
pistillody-stamen	turquoise	GO:0048467	gynoecium development	206	4e-05	0.0048	TraesCS7D02G397800.1	0	0	0	0	0
pistillody-stamen	turquoise	GO:0048467	gynoecium development	206	4e-05	0.0048	TraesCS3B02G248200.1	0	0	1	0	0
pistillody-stamen	turquoise	GO:0048467	gynoecium development	206	4e-05	0.0048	TraesCS3B02G157500.1	0	0	0	0	0
pistillody-stamen	turquoise	GO:0048467	gynoecium development	206	4e-05	0.0048	TraesCS3B02G543300.1	0	0	1	0	0
pistillody-stamen	turquoise	GO:0048467	gynoecium development	206	4e-05	0.0048	TraesCS4D02G101500.1	0	0	0	0	0
pistillody-stamen	turquoise	GO:0048467	gynoecium development	206	4e-05	0.0048	TraesCS2D02G103800.1	0	0	0	0	0
pistillody-stamen	turquoise	GO:0048467	gynoecium development	206	4e-05	0.0048	TraesCS5B02G032000.1	0	0	0	0	0
pistillody-stamen	turquoise	GO:0048467	gynoecium development	206	4e-05	0.0048	TraesCS3B02G475600.1	0	0	1	0	0
pistillody-stamen	turquoise	GO:0048467	gynoecium development	206	4e-05	0.0048	TraesCS4A02G265100.1	0	0	1	0	0
pistillody-stamen	turquoise	GO:0048467	gynoecium development	206	4e-05	0.0048	TraesCS1D02G004900.1	0	0	0	0	0
pistillody-stamen	turquoise	GO:0048467	gynoecium development	206	4e-05	0.0048	TraesCS4B02G287600.1	0	0	0	0	0
pistillody-stamen	turquoise	GO:0048467	gynoecium development	206	4e-05	0.0048	TraesCS4D02G235800.1	0	0	1	0	0
pistillody-stamen	turquoise	GO:0048467	gynoecium development	206	4e-05	0.0048	TraesCS3B02G164500.1	0	0	1	0	0
pistillody-stamen	turquoise	GO:0048467	gynoecium development	206	4e-05	0.0048	TraesCS2A02G268300.1	0	0	0	0	0
pistillody-stamen	turquoise	GO:0048467	gynoecium development	206	4e-05	0.0048	TraesCS1A02G113600.1	0	0	0	0	0
pistillody-stamen	turquoise	GO:0048467	gynoecium development	206	4e-05	0.0048	TraesCS7A02G083800.1	0	0	0	0	0
pistillody-stamen	turquoise	GO:0048467	gynoecium development	206	4e-05	0.0048	TraesCS7A02G245400.1	0	0	0	0	0
pistillody-stamen	turquoise	GO:0048467	gynoecium development	206	4e-05	0.0048	TraesCS3A02G449300.2	0	0	0	0	0
pistillody-stamen	turquoise	GO:0048467	gynoecium development	206	4e-05	0.0048	TraesCS3A02G148400.1	0	0	0	0	0
pistillody-stamen	turquoise	GO:0048467	gynoecium development	206	4e-05	0.0048	TraesCS2B02G191500.1	0	0	0	0	0
pistillody-stamen	turquoise	GO:0048467	gynoecium development	206	4e-05	0.0048	TraesCS2A02G338200.1	0	0	0	0	0
pistillody-stamen	turquoise	GO:0048467	gynoecium development	206	4e-05	0.0048	TraesCS7D02G338800.1	0	0	0	0	0
pistillody-stamen	turquoise	GO:0048467	gynoecium development	206	4e-05	0.0048	TraesCS3A02G495400.1	0	0	1	0	0
pistillody-stamen	turquoise	GO:0048467	gynoecium development	206	4e-05	0.0048	TraesCS1A02G002700.1	0	0	0	0	0
pistillody-stamen	turquoise	GO:0048467	gynoecium development	206	4e-05	0.0048	TraesCS3D02G093300.1	0	0	0	0	0
pistillody-stamen	turquoise	GO:0048467	gynoecium development	206	4e-05	0.0048	TraesCS2B02G497500.1	0	0	1	0	0
pistillody-stamen	turquoise	GO:0048467	gynoecium development	206	4e-05	0.0048	TraesCS7D02G400000.1	0	0	0	0	0
pistillody-stamen	turquoise	GO:0048467	gynoecium development	206	4e-05	0.0048	TraesCS5B02G457300.1	0	0	0	0	0
pistillody-stamen	turquoise	GO:0048467	gynoecium development	206	4e-05	0.0048	TraesCS5A02G245800.1	0	0	0	0	0
pistillody-stamen	turquoise	GO:0048467	gynoecium development	206	4e-05	0.0048	TraesCS3B02G040200.1	0	0	0	0	0
pistillody-stamen	turquoise	GO:0048467	gynoecium development	206	4e-05	0.0048	TraesCS7D02G305200.2	0	0	1	0	0
pistillody-stamen	turquoise	GO:0048467	gynoecium development	206	4e-05	0.0048	TraesCS3D02G234500.1	0	0	0	0	0
pistillody-stamen	turquoise	GO:0048467	gynoecium development	206	4e-05	0.0048	TraesCS7D02G068400.1	0	0	0	0	0
pistillody-stamen	turquoise	GO:0048467	gynoecium development	206	4e-05	0.0048	TraesCS4A02G058800.1	0	0	0	0	0
pistillody-stamen	turquoise	GO:0048467	gynoecium development	206	4e-05	0.0048	TraesCS2A02G521400.2	0	0	0	0	0
pistillody-stamen	turquoise	GO:0048467	gynoecium development	206	4e-05	0.0048	TraesCS6D02G240200.2	0	0	0	0	0
pistillody-stamen	turquoise	GO:0048467	gynoecium development	206	4e-05	0.0048	TraesCS2D02G232800.1	0	0	0	0	0
pistillody-stamen	turquoise	GO:0048467	gynoecium development	206	4e-05	0.0048	TraesCS3D02G434500.1	0	0	0	0	0
pistillody-stamen	turquoise	GO:0048467	gynoecium development	206	4e-05	0.0048	TraesCS2B02G415500.1	0	0	1	0	0
pistillody-stamen	turquoise	GO:0048467	gynoecium development	206	4e-05	0.0048	TraesCS1A02G360700.2	0	0	0	0	0
pistillody-stamen	turquoise	GO:0048467	gynoecium development	206	4e-05	0.0048	TraesCS5D02G400100.2	0	0	0	0	0
pistillody-stamen	turquoise	GO:0048467	gynoecium development	206	4e-05	0.0048	TraesCS2D02G172500.1	0	0	0	0	0
pistillody-stamen	turquoise	GO:0048467	gynoecium development	206	4e-05	0.0048	TraesCS2B02G341800.2	0	0	0	0	0
pistillody-stamen	turquoise	GO:0048467	gynoecium development	206	4e-05	0.0048	TraesCS4A02G059000.1	0	0	1	0	0
pistillody-stamen	turquoise	GO:0048467	gynoecium development	206	4e-05	0.0048	TraesCS6D02G142900.1	0	0	0	0	0
pistillody-stamen	turquoise	GO:0048467	gynoecium development	206	4e-05	0.0048	TraesCS1D02G228900.1	0	0	0	0	0
pistillody-stamen	turquoise	GO:0048467	gynoecium development	206	4e-05	0.0048	TraesCS7B02G146100.1	0	0	1	0	0
pistillody-stamen	turquoise	GO:0048467	gynoecium development	206	4e-05	0.0048	TraesCS5B02G164300.1	0	0	0	0	0
pistillody-stamen	turquoise	GO:0048467	gynoecium development	206	4e-05	0.0048	TraesCS5A02G286800.1	0	0	0	0	0
pistillody-stamen	turquoise	GO:0048467	gynoecium development	206	4e-05	0.0048	TraesCS2A02G330000.1	0	0	0	0	0
pistillody-stamen	turquoise	GO:0048467	gynoecium development	206	4e-05	0.0048	TraesCS3A02G342300.1	0	0	0	0	0
pistillody-stamen	turquoise	GO:0048467	gynoecium development	206	4e-05	0.0048	TraesCS2D02G395000.1	0	0	1	0	0
pistillody-stamen	turquoise	GO:0048467	gynoecium development	206	4e-05	0.0048	TraesCS6B02G186700.1	0	0	0	0	0
pistillody-stamen	turquoise	GO:0048467	gynoecium development	206	4e-05	0.0048	TraesCS5A02G319200.1	0	0	0	0	0
pistillody-stamen	turquoise	GO:0048467	gynoecium development	206	4e-05	0.0048	TraesCS4D02G173100.1	0	0	0	0	0
pistillody-stamen	turquoise	GO:0048467	gynoecium development	206	4e-05	0.0048	TraesCS1D02G243300.1	0	0	0	0	0
pistillody-stamen	turquoise	GO:0048467	gynoecium development	206	4e-05	0.0048	TraesCS3A02G208100.2	0	0	0	0	0
pistillody-stamen	turquoise	GO:0048467	gynoecium development	206	4e-05	0.0048	TraesCS7D02G291200.3	0	0	1	0	0
pistillody-stamen	turquoise	GO:0048467	gynoecium development	206	4e-05	0.0048	TraesCS2A02G397200.1	0	0	1	0	0
pistillody-stamen	turquoise	GO:0048467	gynoecium development	206	4e-05	0.0048	TraesCS3B02G486000.1	0	0	0	0	0
pistillody-stamen	turquoise	GO:0048467	gynoecium development	206	4e-05	0.0048	TraesCS6A02G163400.1	0	0	0	0	0
pistillody-stamen	turquoise	GO:0048467	gynoecium development	206	4e-05	0.0048	TraesCS5A02G491400.1	0	0	0	0	0
pistillody-stamen	turquoise	GO:0048467	gynoecium development	206	4e-05	0.0048	TraesCS7D02G313000.1	0	0	1	0	0
pistillody-stamen	turquoise	GO:0048467	gynoecium development	206	4e-05	0.0048	TraesCS3B02G162500.2	0	0	0	0	0
pistillody-stamen	turquoise	GO:0048467	gynoecium development	206	4e-05	0.0048	TraesCS1D02G452700.1	0	0	0	0	0
pistillody-stamen	turquoise	GO:0048467	gynoecium development	206	4e-05	0.0048	TraesCS5A02G250600.1	0	0	0	0	0
pistillody-stamen	turquoise	GO:0048467	gynoecium development	206	4e-05	0.0048	TraesCS2B02G250900.1	0	0	0	0	0
pistillody-stamen	turquoise	GO:0048467	gynoecium development	206	4e-05	0.0048	TraesCS5A02G206700.1	0	0	0	0	0
pistillody-stamen	turquoise	GO:0048467	gynoecium development	206	4e-05	0.0048	TraesCS7A02G476700.1	0	0	0	0	0
pistillody-stamen	turquoise	GO:0048467	gynoecium development	206	4e-05	0.0048	TraesCS2D02G505400.1	0	0	0	0	0
pistillody-stamen	turquoise	GO:0048467	gynoecium development	206	4e-05	0.0048	TraesCS3D02G489400.1	0	0	0	0	0
pistillody-stamen	turquoise	GO:0048467	gynoecium development	206	4e-05	0.0048	TraesCS7D02G060400.1	0	0	0	0	0
pistillody-stamen	turquoise	GO:0048467	gynoecium development	206	4e-05	0.0048	TraesCS5A02G177300.1	0	0	0	0	0
pistillody-stamen	turquoise	GO:0048467	gynoecium development	206	4e-05	0.0048	TraesCS7B02G267900.1	0	0	1	0	0
pistillody-stamen	turquoise	GO:0048467	gynoecium development	206	4e-05	0.0048	TraesCS7A02G532900.1	0	0	0	0	0
pistillody-stamen	turquoise	GO:0048467	gynoecium development	206	4e-05	0.0048	TraesCS1A02G262700.1	0	0	0	0	0
pistillody-stamen	turquoise	GO:0048467	gynoecium development	206	4e-05	0.0048	TraesCS4D02G286400.1	0	0	1	0	0
pistillody-stamen	turquoise	GO:0048467	gynoecium development	206	4e-05	0.0048	TraesCS4B02G049800.1	0	0	0	0	0
pistillody-stamen	turquoise	GO:0048467	gynoecium development	206	4e-05	0.0048	TraesCS6A02G129700.1	0	0	0	0	0
pistillody-stamen	turquoise	GO:0048467	gynoecium development	206	4e-05	0.0048	TraesCS1D02G127700.1	0	0	0	0	0
pistillody-stamen	turquoise	GO:0048467	gynoecium development	206	4e-05	0.0048	TraesCS1B02G058600.1	0	0	0	0	0
pistillody-stamen	turquoise	GO:0048467	gynoecium development	206	4e-05	0.0048	TraesCS1B02G091700.1	0	0	0	0	0
pistillody-stamen	turquoise	GO:0048467	gynoecium development	206	4e-05	0.0048	TraesCS1B02G084500.1	0	0	1	0	0
pistillody-stamen	turquoise	GO:0048467	gynoecium development	206	4e-05	0.0048	TraesCS6A02G118100.1	0	0	0	0	0
pistillody-stamen	turquoise	GO:0048467	gynoecium development	206	4e-05	0.0048	TraesCS3B02G005900.1	0	0	0	0	0
pistillody-stamen	turquoise	GO:0048467	gynoecium development	206	4e-05	0.0048	TraesCS2D02G116700.1	0	0	1	0	0
pistillody-stamen	turquoise	GO:0048467	gynoecium development	206	4e-05	0.0048	TraesCS7A02G066200.1	0	0	0	0	0
pistillody-stamen	turquoise	GO:0048467	gynoecium development	206	4e-05	0.0048	TraesCS6A02G266400.2	0	0	0	0	0
pistillody-stamen	turquoise	GO:0048467	gynoecium development	206	4e-05	0.0048	TraesCS2B02G121100.1	0	0	0	0	0
pistillody-stamen	turquoise	GO:0048467	gynoecium development	206	4e-05	0.0048	TraesCS6D02G147400.1	0	0	0	0	0
pistillody-stamen	turquoise	GO:0048467	gynoecium development	206	4e-05	0.0048	TraesCS5A02G407500.2	0	0	1	0	0
pistillody-stamen	turquoise	GO:0048467	gynoecium development	206	4e-05	0.0048	TraesCS1A02G125800.1	0	0	0	0	0
pistillody-stamen	turquoise	GO:0048467	gynoecium development	206	4e-05	0.0048	TraesCS1B02G309800.1	0	0	0	0	0
pistillody-stamen	turquoise	GO:0048467	gynoecium development	206	4e-05	0.0048	TraesCS1B02G241400.1	0	0	0	0	0
pistillody-stamen	turquoise	GO:0048467	gynoecium development	206	4e-05	0.0048	TraesCS2D02G133800.1	0	0	0	0	0
pistillody-stamen	turquoise	GO:0048467	gynoecium development	206	4e-05	0.0048	TraesCS3A02G442000.1	0	0	0	0	0
pistillody-stamen	turquoise	GO:0048467	gynoecium development	206	4e-05	0.0048	TraesCS2A02G187800.1	0	0	1	0	0
pistillody-stamen	turquoise	GO:0048467	gynoecium development	206	4e-05	0.0048	TraesCS4D02G241100.1	0	0	0	0	0
pistillody-stamen	turquoise	GO:0048467	gynoecium development	206	4e-05	0.0048	TraesCS2D02G322600.1	0	0	0	0	0
pistillody-stamen	turquoise	GO:0048467	gynoecium development	206	4e-05	0.0048	TraesCS7B02G181700.1	0	0	1	0	0
pistillody-stamen	turquoise	GO:0048467	gynoecium development	206	4e-05	0.0048	TraesCS1B02G002000.1	0	0	0	0	0
pistillody-stamen	turquoise	GO:0048467	gynoecium development	206	4e-05	0.0048	TraesCS2D02G473700.1	0	0	1	0	0
pistillody-stamen	turquoise	GO:0048467	gynoecium development	206	4e-05	0.0048	TraesCS1A02G066200.1	0	0	1	0	0
pistillody-stamen	turquoise	GO:0048467	gynoecium development	206	4e-05	0.0048	TraesCS7D02G510400.1	0	0	0	0	0
pistillody-stamen	turquoise	GO:0048467	gynoecium development	206	4e-05	0.0048	TraesCS2D02G263500.1	0	0	0	0	0
pistillody-stamen	turquoise	GO:0048467	gynoecium development	206	4e-05	0.0048	TraesCS2A02G504700.1	0	0	0	0	0
pistillody-stamen	turquoise	GO:0048467	gynoecium development	206	4e-05	0.0048	TraesCS5A02G155100.1	0	0	0	0	0
pistillody-stamen	turquoise	GO:0048467	gynoecium development	206	4e-05	0.0048	TraesCS4D02G050200.1	0	0	1	0	0
pistillody-stamen	turquoise	GO:0048467	gynoecium development	206	4e-05	0.0048	TraesCS1D02G067200.1	0	0	0	0	0
pistillody-stamen	turquoise	GO:0048467	gynoecium development	206	4e-05	0.0048	TraesCS3B02G175300.1	0	0	0	0	0
pistillody-stamen	turquoise	GO:0048467	gynoecium development	206	4e-05	0.0048	TraesCS3D02G502600.1	0	0	1	0	0
pistillody-stamen	turquoise	GO:0048467	gynoecium development	206	4e-05	0.0048	TraesCS3B02G475800.1	0	0	0	0	0
pistillody-stamen	turquoise	GO:0048467	gynoecium development	206	4e-05	0.0048	TraesCS3B02G236500.1	0	0	0	0	0
pistillody-stamen	turquoise	GO:0048467	gynoecium development	206	4e-05	0.0048	TraesCS4A02G422700.1	0	0	0	0	0
pistillody-stamen	turquoise	GO:0048467	gynoecium development	206	4e-05	0.0048	TraesCS2B02G343800.1	0	0	0	0	0
pistillody-stamen	turquoise	GO:0048467	gynoecium development	206	4e-05	0.0048	TraesCS2A02G474000.1	0	0	0	0	0
pistillody-stamen	turquoise	GO:0048467	gynoecium development	206	4e-05	0.0048	TraesCS7A02G284900.2	0	0	1	0	0
pistillody-stamen	turquoise	GO:0048467	gynoecium development	206	4e-05	0.0048	TraesCS5A02G167300.2	0	0	0	0	0
pistillody-stamen	turquoise	GO:0048467	gynoecium development	206	4e-05	0.0048	TraesCS3D02G054400.1	0	0	0	0	0
pistillody-stamen	turquoise	GO:0048467	gynoecium development	206	4e-05	0.0048	TraesCS3A02G142200.1	0	0	0	0	0
pistillody-stamen	turquoise	GO:0048467	gynoecium development	206	4e-05	0.0048	TraesCS1D02G262700.1	0	0	0	0	0
pistillody-stamen	turquoise	GO:0048467	gynoecium development	206	4e-05	0.0048	TraesCS3A02G140100.1	0	0	1	0	0
pistillody-stamen	turquoise	GO:0048467	gynoecium development	206	4e-05	0.0048	TraesCS7B02G208600.1	0	0	0	0	0
pistillody-stamen	turquoise	GO:0048441	petal development	58	9.9e-05	0.011	TraesCS1B02G273300.1	0	0	0	0	0
pistillody-stamen	turquoise	GO:0048441	petal development	58	9.9e-05	0.011	TraesCS5B02G457600.1	0	0	0	0	0
pistillody-stamen	turquoise	GO:0048441	petal development	58	9.9e-05	0.011	TraesCS3B02G435700.1	0	0	1	0	0
pistillody-stamen	turquoise	GO:0048441	petal development	58	9.9e-05	0.011	TraesCS5A02G118700.2	0	0	0	0	0
pistillody-stamen	turquoise	GO:0048441	petal development	58	9.9e-05	0.011	TraesCS7D02G257000.1	0	0	0	0	0
pistillody-stamen	turquoise	GO:0048441	petal development	58	9.9e-05	0.011	TraesCS3A02G000300.1	0	0	0	0	0
pistillody-stamen	turquoise	GO:0048441	petal development	58	9.9e-05	0.011	TraesCS7D02G060400.1	0	0	0	0	0
pistillody-stamen	turquoise	GO:0048441	petal development	58	9.9e-05	0.011	TraesCS7B02G072700.1	0	0	0	0	0
pistillody-stamen	turquoise	GO:0048441	petal development	58	9.9e-05	0.011	TraesCS1D02G354500.2	0	0	1	0	0
pistillody-stamen	turquoise	GO:0048441	petal development	58	9.9e-05	0.011	TraesCS6A02G191200.1	0	0	0	0	0
pistillody-stamen	turquoise	GO:0048441	petal development	58	9.9e-05	0.011	TraesCS5B02G286100.2	0	0	0	0	0
pistillody-stamen	turquoise	GO:0048441	petal development	58	9.9e-05	0.011	TraesCS7B02G303300.1	0	0	0	0	0
pistillody-stamen	turquoise	GO:0048441	petal development	58	9.9e-05	0.011	TraesCS1A02G262700.1	0	0	0	0	0
pistillody-stamen	turquoise	GO:0048441	petal development	58	9.9e-05	0.011	TraesCS3A02G421400.1	0	0	0	0	0
pistillody-stamen	turquoise	GO:0048441	petal development	58	9.9e-05	0.011	TraesCS3D02G008800.1	0	0	0	0	0
pistillody-stamen	turquoise	GO:0048441	petal development	58	9.9e-05	0.011	TraesCS6A02G222300.1	0	0	0	0	0
pistillody-stamen	turquoise	GO:0048441	petal development	58	9.9e-05	0.011	TraesCS2D02G516300.2	0	0	0	0	0
pistillody-stamen	turquoise	GO:0048441	petal development	58	9.9e-05	0.011	TraesCS1D02G127700.1	0	0	0	0	0
pistillody-stamen	turquoise	GO:0048441	petal development	58	9.9e-05	0.011	TraesCS2D02G133800.1	0	0	0	0	0
pistillody-stamen	turquoise	GO:0048441	petal development	58	9.9e-05	0.011	TraesCS6B02G354900.1	0	0	1	0	0
pistillody-stamen	turquoise	GO:0048441	petal development	58	9.9e-05	0.011	TraesCS7A02G066200.1	0	0	0	0	0
pistillody-stamen	turquoise	GO:0048441	petal development	58	9.9e-05	0.011	TraesCS3D02G192400.1	0	0	0	0	0
pistillody-stamen	turquoise	GO:0048441	petal development	58	9.9e-05	0.011	TraesCS1B02G144800.3	0	0	0	0	0
pistillody-stamen	turquoise	GO:0048441	petal development	58	9.9e-05	0.011	TraesCS6A02G324500.1	0	0	1	0	0
pistillody-stamen	turquoise	GO:0048441	petal development	58	9.9e-05	0.011	TraesCS4A02G430600.1	0	0	1	0	0
pistillody-stamen	turquoise	GO:0048441	petal development	58	9.9e-05	0.011	TraesCS6D02G304300.1	0	0	1	0	0
pistillody-stamen	turquoise	GO:0048441	petal development	58	9.9e-05	0.011	TraesCS7A02G167900.1	0	0	0	0	0
pistillody-stamen	turquoise	GO:0048441	petal development	58	9.9e-05	0.011	TraesCS4A02G058800.1	0	0	0	0	0
pistillody-stamen	turquoise	GO:0048441	petal development	58	9.9e-05	0.011	TraesCS4B02G137400.1	0	0	0	0	0
pistillody-stamen	turquoise	GO:0048441	petal development	58	9.9e-05	0.011	TraesCS5B02G454200.1	0	0	0	0	0
pistillody-stamen	turquoise	GO:0048441	petal development	58	9.9e-05	0.011	TraesCS4A02G237600.1	0	0	0	0	0
pistillody-stamen	turquoise	GO:0048441	petal development	58	9.9e-05	0.011	TraesCS3B02G003800.1	0	0	0	0	0
pistillody-stamen	turquoise	GO:0048441	petal development	58	9.9e-05	0.011	TraesCS7B02G468100.3	0	0	0	0	0
pistillody-stamen	turquoise	GO:0048441	petal development	58	9.9e-05	0.011	TraesCS3A02G402300.1	0	0	0	0	0
pistillody-stamen	turquoise	GO:0048441	petal development	58	9.9e-05	0.011	TraesCS2A02G478800.1	0	0	0	0	0
pistillody-stamen	turquoise	GO:0048441	petal development	58	9.9e-05	0.011	TraesCS1A02G125800.1	0	0	0	0	0
pistillody-stamen	turquoise	GO:0048441	petal development	58	9.9e-05	0.011	TraesCS7D02G168700.1	0	0	0	0	0
pistillody-stamen	turquoise	GO:0048441	petal development	58	9.9e-05	0.011	TraesCS3D02G397200.1	0	0	1	0	0
pistillody-stamen	turquoise	GO:0048441	petal development	58	9.9e-05	0.011	TraesCS1B02G270400.1	0	0	0	0	0
pistillody-stamen	turquoise	GO:0048441	petal development	58	9.9e-05	0.011	TraesCS6B02G151900.1	0	0	1	0	0
pistillody-stamen	turquoise	GO:0048441	petal development	58	9.9e-05	0.011	TraesCS3B02G157500.1	0	0	0	0	0
pistillody-stamen	turquoise	GO:0048441	petal development	58	9.9e-05	0.011	TraesCS7A02G544700.2	0	0	0	0	0
pistillody-stamen	turquoise	GO:0048441	petal development	58	9.9e-05	0.011	TraesCS7A02G256200.1	0	0	0	0	0
pistillody-stamen	turquoise	GO:0048441	petal development	58	9.9e-05	0.011	TraesCS5A02G286800.1	0	0	0	0	0
pistillody-stamen	turquoise	GO:0048441	petal development	58	9.9e-05	0.011	TraesCS5B02G159900.5	0	0	0	0	0
pistillody-stamen	turquoise	GO:0048441	petal development	58	9.9e-05	0.011	TraesCS7B02G152800.1	0	0	0	0	0
pistillody-stamen	turquoise	GO:0048441	petal development	58	9.9e-05	0.011	TraesCS5A02G250600.1	0	0	0	0	0
pistillody-stamen	turquoise	GO:0048441	petal development	58	9.9e-05	0.011	TraesCS4A02G422700.1	0	0	0	0	0
pistillody-stamen	turquoise	GO:0048441	petal development	58	9.9e-05	0.011	TraesCS7A02G059000.1	0	0	0	0	0
pistillody-stamen	turquoise	GO:0048441	petal development	58	9.9e-05	0.011	TraesCS1D02G153700.1	0	0	0	0	0
pistillody-stamen	turquoise	GO:0048441	petal development	58	9.9e-05	0.011	TraesCS4A02G180100.1	0	0	0	0	0
pistillody-stamen	turquoise	GO:0048441	petal development	58	9.9e-05	0.011	TraesCS2B02G154100.1	0	0	0	0	0
pistillody-stamen	turquoise	GO:0048441	petal development	58	9.9e-05	0.011	TraesCS5D02G040800.1	0	0	0	0	0
pistillody-stamen	turquoise	GO:0048441	petal development	58	9.9e-05	0.011	TraesCS4D02G132100.1	0	0	0	0	0
pistillody-stamen	turquoise	GO:0048441	petal development	58	9.9e-05	0.011	TraesCS7D02G053600.1	0	0	0	0	0
pistillody-stamen	turquoise	GO:0048441	petal development	58	9.9e-05	0.011	TraesCS5D02G294500.1	0	0	0	0	0
pistillody-stamen	turquoise	GO:0048441	petal development	58	9.9e-05	0.011	TraesCS1D02G262700.1	0	0	0	0	0
pistillody-stamen	turquoise	GO:0048441	petal development	58	9.9e-05	0.011	TraesCS4D02G125300.1	0	0	0	0	0
stamen	green	GO:0043667	pollen wall	8	2.7e-06	0.00036	TraesCS7B02G135400.1	0	0	0	0	0
stamen	green	GO:0043667	pollen wall	8	2.7e-06	0.00036	TraesCS3A02G126300.1	0	0	0	0	0
stamen	green	GO:0043667	pollen wall	8	2.7e-06	0.00036	TraesCS4A02G410800.1	0	0	0	0	0
stamen	green	GO:0043667	pollen wall	8	2.7e-06	0.00036	TraesCS4B02G310900.1	0	0	0	0	0
stamen	green	GO:0043667	pollen wall	8	2.7e-06	0.00036	TraesCS3D02G127300.1	0	0	0	0	0
stamen	green	GO:0043667	pollen wall	8	2.7e-06	0.00036	TraesCS3B02G145500.1	0	0	0	0	0
stamen	green	GO:0043667	pollen wall	8	2.7e-06	0.00036	TraesCS7D02G237600.1	0	0	0	0	0
stamen	green	GO:0043667	pollen wall	8	2.7e-06	0.00036	TraesCS7A02G239800.1	0	0	0	0	0
						2/
