# Supplementary material for: Co-expression network analysis of genes and networks associated with wheat pistillody
Source: PeerJ. 2022 Aug 24;10:e13902. doi: 10.7717/peerj.13902 (PMC9419718; doi:10.7717/peerj.13902)
Supplement: Table S2 [file peerj-10-13902-s002.xlsx]

## Sheet: Table S2
Published Protein Accession	SubjectProteinAccession	Identity	Published_start	Published_end	Subject_start	subject_end	Expect	Score	Published_length	Coverge=(Published_end-Published_start+1)/Published_length	anther development (GO:0048653)	stamen development (GO:0048443)	plant ovule development (GO:0048481)	plant-type ovary development (GO:0035670)	carpel development (GO:0048440)	flower development (GO:0009908)	Module	Reference	Gene name
comp126731_c0	TraesCS5B02G552800.1	100	1	25	103	127	3e-07	52.4	25	1	1	1	0	0	0	1		Yang ZJ, Peng ZS, Wei SH, Liao ML, Yu Y, Jang ZY. Pistillody mutant reveals key insights into stamen and pistil development in wheat (Triticum aestivum L.). BMC Genomics. 2016;16:237.
BAG84632.1	TraesCS7A02G237800.1	94.16	124	260	1	137	7e-73	272	261	0.524904	0	0	0	0	0	0		Zhu, Y, Saraike, T, Yamamoto, Y, Hagita, H, Takumi, S, Murai, K. orf260cra, a novel mitochondrial gene, is associated with the homeotic transformation of stamen into pistil-like structures (pistillody) in alloplasmic wheat. Plant Cell Physiol. 2008, 49, 1723–1733.	orf260cra gene
BAM65843.1	TraesCS5D02G102100.1	100	14	555	121	662	0	1115	557	0.97307	0	0	0	0	0	0		Mika Yamamoto, Naoki Shitsukawa, Maki Yamada, Keisuke Kato, Shigeo Takumi, Kanako Kawaura, Yasunari Ogihara, Koji Murai: Identification of a novel homolog for a calmodulin-binding protein that is upregulated in alloplasmic wheat showing pistillody. Planta (2013) 237:1001–1013	WCBP1 gene
BAA82046.1	TraesCS4D02G236200.1	100	1	192	1	192	2e-97	353	192	1	0	0	0	0	0	0	MEyellow	Hama, E, Takumi, S, Ogihara, Y, Murai, K. Pistillody is caused by alterations to the class-B MADS-box gene expression pattern in alloplasmic wheats. Planta 2004, 218, 712–720.	orf25 gene
BAF79635.1	TraesCS2B02G309900.1	99.49	1	782	1	782	0	1424	782	1	0	0	0	0	0	0		Tatsunori Saraike, Naoki Shitsukawa, Yuko Yamamoto, Hiroko Hagita, Yukimoto Iwasaki, Shigeo Takumi, Koji Murai: Identification of a protein kinase gene associated with pistillody, homeotic transformation of stamens into pistil-like structures, in alloplasmic wheat. Planta (2007) 227:211–221	WPPK1 gene
comp108827_c0	TraesCS2D02G265100.1	100	45	353	29	337	3e-177	619	353	0.875354	0	0	0	0	0	0	MEgreen	Yang ZJ, Peng ZS, Wei SH, Liao ML, Yu Y, Jang ZY. Pistillody mutant reveals key insights into stamen and pistil development in wheat (Triticum aestivum L.). BMC Genomics. 2016;16:211.
comp118609_c0	TraesCS1D02G309800.1	99.72	13	374	1	362	1e-180	631	401	0.902743	0	0	0	0	0	0		Yang ZJ, Peng ZS, Wei SH, Liao ML, Yu Y, Jang ZY. Pistillody mutant reveals key insights into stamen and pistil development in wheat (Triticum aestivum L.). BMC Genomics. 2016;16:211.
comp109741_c0	TraesCS5A02G452600.1	91.91	2	173	1	173	1e-63	240	191	0.900524	0	0	0	0	0	0	MEgreen	Yang ZJ, Peng ZS, Wei SH, Liao ML, Yu Y, Jang ZY. Pistillody mutant reveals key insights into stamen and pistil development in wheat (Triticum aestivum L.). BMC Genomics. 2016;16:211.
comp118917_c0	TraesCS2D02G374500.1	98.57	4	491	1	486	0	934	491	0.99389	0	0	0	0	0	0		Yang ZJ, Peng ZS, Wei SH, Liao ML, Yu Y, Jang ZY. Pistillody mutant reveals key insights into stamen and pistil development in wheat (Triticum aestivum L.). BMC Genomics. 2016;16:212.
comp104554_c0	TraesCS5B02G423700.1	98.56	16	433	1	414	0	830	433	0.965358	0	0	0	0	0	0	MEgreen	Yang ZJ, Peng ZS, Wei SH, Liao ML, Yu Y, Jang ZY. Pistillody mutant reveals key insights into stamen and pistil development in wheat (Triticum aestivum L.). BMC Genomics. 2016;16:213.
comp101831_c0	TraesCS4D02G217600.1	100	17	119	55	157	6e-53	204	119	0.865546	0	0	0	0	0	0		Yang ZJ, Peng ZS, Wei SH, Liao ML, Yu Y, Jang ZY. Pistillody mutant reveals key insights into stamen and pistil development in wheat (Triticum aestivum L.). BMC Genomics. 2016;16:214.
comp101831_c0	TraesCS4D02G217600.1	100	34	87	1	54	3e-14	75.5	119	0.453782	0	0	0	0	0	0		Yang ZJ, Peng ZS, Wei SH, Liao ML, Yu Y, Jang ZY. Pistillody mutant reveals key insights into stamen and pistil development in wheat (Triticum aestivum L.). BMC Genomics. 2016;16:215.
comp112524_c0	TraesCS1B02G244800.1	97.33	15	538	1	524	0	1042	538	0.973978	0	0	0	0	0	0		Yang ZJ, Peng ZS, Wei SH, Liao ML, Yu Y, Jang ZY. Pistillody mutant reveals key insights into stamen and pistil development in wheat (Triticum aestivum L.). BMC Genomics. 2016;16:216.
comp106200_c0	TraesCS6B02G411000.1	99.44	4	180	1	177	2e-67	253	180	0.983333	0	0	0	0	0	0	MEgreen	Yang ZJ, Peng ZS, Wei SH, Liao ML, Yu Y, Jang ZY. Pistillody mutant reveals key insights into stamen and pistil development in wheat (Triticum aestivum L.). BMC Genomics. 2016;16:217.
comp128379_c0	TraesCS6D02G082700.1	100	1	42	107	148	6e-13	71.2	42	1	0	0	0	0	0	0	MEgreen	Yang ZJ, Peng ZS, Wei SH, Liao ML, Yu Y, Jang ZY. Pistillody mutant reveals key insights into stamen and pistil development in wheat (Triticum aestivum L.). BMC Genomics. 2016;16:218.
comp109302_c0	TraesCS1D02G210500.1	100	1	370	117	486	1e-175	614	370	1	0	0	0	0	0	0		Yang ZJ, Peng ZS, Wei SH, Liao ML, Yu Y, Jang ZY. Pistillody mutant reveals key insights into stamen and pistil development in wheat (Triticum aestivum L.). BMC Genomics. 2016;16:219.
comp107562_c0	TraesCS5B02G024600.1	100	1	198	575	772	8e-114	407	198	1	0	0	0	0	0	0		Yang ZJ, Peng ZS, Wei SH, Liao ML, Yu Y, Jang ZY. Pistillody mutant reveals key insights into stamen and pistil development in wheat (Triticum aestivum L.). BMC Genomics. 2016;16:220.
comp111026_c0	TraesCS3D02G174800.1	98.71	16	404	1	389	2e-165	580	404	0.962871	0	0	0	0	0	0		Yang ZJ, Peng ZS, Wei SH, Liao ML, Yu Y, Jang ZY. Pistillody mutant reveals key insights into stamen and pistil development in wheat (Triticum aestivum L.). BMC Genomics. 2016;16:221.
comp116532_c0	TraesCS2D02G197300.1	100	28	523	1	496	0	1001	523	0.948375	0	0	0	0	0	0		Yang ZJ, Peng ZS, Wei SH, Liao ML, Yu Y, Jang ZY. Pistillody mutant reveals key insights into stamen and pistil development in wheat (Triticum aestivum L.). BMC Genomics. 2016;16:222.
comp107737_c0	TraesCS4A02G195500.1	100	76	280	43	247	5e-62	236	280	0.732143	0	0	0	0	0	0	MEgreen	Yang ZJ, Peng ZS, Wei SH, Liao ML, Yu Y, Jang ZY. Pistillody mutant reveals key insights into stamen and pistil development in wheat (Triticum aestivum L.). BMC Genomics. 2016;16:223.
comp119854_c0	TraesCS7A02G535900.1	100	12	376	1	365	0	727	376	0.970745	0	0	0	0	0	0	MEgreen	Yang ZJ, Peng ZS, Wei SH, Liao ML, Yu Y, Jang ZY. Pistillody mutant reveals key insights into stamen and pistil development in wheat (Triticum aestivum L.). BMC Genomics. 2016;16:224.
comp110471_c0	TraesCS7B02G041600.1	96.28	27	402	1	374	0	659	402	0.935323	0	0	0	0	0	0	MEgreen	Yang ZJ, Peng ZS, Wei SH, Liao ML, Yu Y, Jang ZY. Pistillody mutant reveals key insights into stamen and pistil development in wheat (Triticum aestivum L.). BMC Genomics. 2016;16:225.
comp127876_c0	TraesCS6A02G339300.1	100	35	405	17	387	0	634	405	0.916049	0	0	0	0	0	0	MEgreen	Yang ZJ, Peng ZS, Wei SH, Liao ML, Yu Y, Jang ZY. Pistillody mutant reveals key insights into stamen and pistil development in wheat (Triticum aestivum L.). BMC Genomics. 2016;16:226.
comp122918_c0	TraesCS4D02G062100.1	99.24	35	828	10	803	0	1045	828	0.958937	0	0	0	0	0	0	MEgreen	Yang ZJ, Peng ZS, Wei SH, Liao ML, Yu Y, Jang ZY. Pistillody mutant reveals key insights into stamen and pistil development in wheat (Triticum aestivum L.). BMC Genomics. 2016;16:227.
comp106398_c0	TraesCS4D02G269200.1	33.33	33	80	253	300	0.11	36.2	297	0.161616	0	0	0	0	0	0		Yang ZJ, Peng ZS, Wei SH, Liao ML, Yu Y, Jang ZY. Pistillody mutant reveals key insights into stamen and pistil development in wheat (Triticum aestivum L.). BMC Genomics. 2016;16:228.
comp100485_c1	TraesCS4B02G260900.1	100	34	217	1	184	2e-69	260	222	0.828829	0	0	0	0	0	0	MEgreen	Yang ZJ, Peng ZS, Wei SH, Liao ML, Yu Y, Jang ZY. Pistillody mutant reveals key insights into stamen and pistil development in wheat (Triticum aestivum L.). BMC Genomics. 2016;16:229.
comp113840_c0	TraesCS2D02G189800.1	100	117	199	129	211	1e-30	131	222	0.373874	0	0	0	0	0	0	MEgreen	Yang ZJ, Peng ZS, Wei SH, Liao ML, Yu Y, Jang ZY. Pistillody mutant reveals key insights into stamen and pistil development in wheat (Triticum aestivum L.). BMC Genomics. 2016;16:230.
comp119870_c1	TraesCS2D02G409600.1	97.1	24	505	1	480	0	983	505	0.954455	0	0	0	0	0	0		Yang ZJ, Peng ZS, Wei SH, Liao ML, Yu Y, Jang ZY. Pistillody mutant reveals key insights into stamen and pistil development in wheat (Triticum aestivum L.). BMC Genomics. 2016;16:231.
comp114381_c0	TraesCS5D02G169100.1	99.16	3	360	1	358	0	632	360	0.994444	0	0	0	0	0	0	MEgreen	Yang ZJ, Peng ZS, Wei SH, Liao ML, Yu Y, Jang ZY. Pistillody mutant reveals key insights into stamen and pistil development in wheat (Triticum aestivum L.). BMC Genomics. 2016;16:232.
comp111424_c1	TraesCS4D02G268200.1	100	1	335	51	385	1e-175	614	335	1	0	0	0	0	0	0		Yang ZJ, Peng ZS, Wei SH, Liao ML, Yu Y, Jang ZY. Pistillody mutant reveals key insights into stamen and pistil development in wheat (Triticum aestivum L.). BMC Genomics. 2016;16:233.
comp107023_c0	TraesCS1B02G444900.1	99.4	9	175	1	167	4e-77	285	175	0.954286	0	0	0	0	0	0		Yang ZJ, Peng ZS, Wei SH, Liao ML, Yu Y, Jang ZY. Pistillody mutant reveals key insights into stamen and pistil development in wheat (Triticum aestivum L.). BMC Genomics. 2016;16:234.
comp108842_c0	TraesCS2B02G320900.1	100	1	646	8	653	0	1339	646	1	0	0	0	0	0	0		Yang ZJ, Peng ZS, Wei SH, Liao ML, Yu Y, Jang ZY. Pistillody mutant reveals key insights into stamen and pistil development in wheat (Triticum aestivum L.). BMC Genomics. 2016;16:235.
comp123112_c0	TraesCS1A02G415200.2	99.26	5	948	1	944	0	1288	948	0.995781	0	0	0	0	0	0		Yang ZJ, Peng ZS, Wei SH, Liao ML, Yu Y, Jang ZY. Pistillody mutant reveals key insights into stamen and pistil development in wheat (Triticum aestivum L.). BMC Genomics. 2016;16:236.
comp104526_c0	TraesCS6A02G240400.1	100	1	131	91	221	6e-53	204	131	1	0	1	0	0	0	1		Yang ZJ, Peng ZS, Wei SH, Liao ML, Yu Y, Jang ZY. Pistillody mutant reveals key insights into stamen and pistil development in wheat (Triticum aestivum L.). BMC Genomics. 2016;16:244.
comp119476_c0	TraesCS6A02G330100.1	98.2	9	394	1	388	0	662	394	0.979695	0	0	0	0	0	0	MEgreen	Yang ZJ, Peng ZS, Wei SH, Liao ML, Yu Y, Jang ZY. Pistillody mutant reveals key insights into stamen and pistil development in wheat (Triticum aestivum L.). BMC Genomics. 2016;16:238.
comp106673_c0	TraesCS6A02G006900.1	95.96	19	215	1	198	2e-51	200	215	0.916279	0	0	0	0	0	0		Yang ZJ, Peng ZS, Wei SH, Liao ML, Yu Y, Jang ZY. Pistillody mutant reveals key insights into stamen and pistil development in wheat (Triticum aestivum L.). BMC Genomics. 2016;16:239.
comp100013_c0	TraesCS5B02G015000.1	100	1	40	30	69	1e-13	73.2	40	1	0	0	0	0	0	0	MEgreen	Yang ZJ, Peng ZS, Wei SH, Liao ML, Yu Y, Jang ZY. Pistillody mutant reveals key insights into stamen and pistil development in wheat (Triticum aestivum L.). BMC Genomics. 2016;16:240.
comp116065_c1	TraesCS4B02G282100.1	98.13	26	239	1	214	5e-102	369	240	0.891667	0	0	0	0	0	0		Yang ZJ, Peng ZS, Wei SH, Liao ML, Yu Y, Jang ZY. Pistillody mutant reveals key insights into stamen and pistil development in wheat (Triticum aestivum L.). BMC Genomics. 2016;16:241.
comp116065_c1	TraesCS4A02G021500.1	99.44	28	204	209	385	9e-72	268	240	0.7375	0	0	0	0	0	0		Yang ZJ, Peng ZS, Wei SH, Liao ML, Yu Y, Jang ZY. Pistillody mutant reveals key insights into stamen and pistil development in wheat (Triticum aestivum L.). BMC Genomics. 2016;16:242.
comp115045_c1	TraesCS5B02G001000.1	97.2	1	107	411	517	1e-55	212	107	1	0	0	0	0	0	0		Yang ZJ, Peng ZS, Wei SH, Liao ML, Yu Y, Jang ZY. Pistillody mutant reveals key insights into stamen and pistil development in wheat (Triticum aestivum L.). BMC Genomics. 2016;16:243.
comp99464_c0	TraesCS3D02G277200.1	100	1	35	129	163	6e-14	74.3	35	1	0	0	0	0	0	1		Yang ZJ, Peng ZS, Wei SH, Liao ML, Yu Y, Jang ZY. Pistillody mutant reveals key insights into stamen and pistil development in wheat (Triticum aestivum L.). BMC Genomics. 2016;16:314.
comp112453_c0	TraesCS6A02G331400.1	96.95	44	338	20	314	3e-135	479	358	0.824022	0	0	0	0	0	0		Yang ZJ, Peng ZS, Wei SH, Liao ML, Yu Y, Jang ZY. Pistillody mutant reveals key insights into stamen and pistil development in wheat (Triticum aestivum L.). BMC Genomics. 2016;16:245.
comp114948_c0	TraesCS3B02G427100.1	97.94	20	456	19	451	0	680	456	0.958333	0	0	0	0	0	0		Yang ZJ, Peng ZS, Wei SH, Liao ML, Yu Y, Jang ZY. Pistillody mutant reveals key insights into stamen and pistil development in wheat (Triticum aestivum L.). BMC Genomics. 2016;16:246.
BAA33459.1	TraesCS7B02G286600.2	99.13	1	229	1	229	2e-112	403	230	0.995652	0	1	1	1	1	1	MEgreen	Murai K, Takumi S, Koga H, Ogihara Y: Pistillody, homeotic transformation of stamens into pistil-like structures, caused by nuclear±cytoplasm interaction in wheat. The Plant Journal, 2002, 29(2), 169-181.	WAP3 gene
comp118336_c0	TraesCS2A02G295400.1	99.02	6	616	51	661	0	1234	616	0.991883	0	0	0	0	0	0	MEgreen	Yang ZJ, Peng ZS, Wei SH, Liao ML, Yu Y, Jang ZY. Pistillody mutant reveals key insights into stamen and pistil development in wheat (Triticum aestivum L.). BMC Genomics. 2016;16:248.
comp139174_c0	TraesCS7D02G178800.2	64	69	93	140	164	0.81	32	177	0.141243	0	0	0	0	0	0		Yang ZJ, Peng ZS, Wei SH, Liao ML, Yu Y, Jang ZY. Pistillody mutant reveals key insights into stamen and pistil development in wheat (Triticum aestivum L.). BMC Genomics. 2016;16:249.
comp118751_c0	TraesCS6B02G278300.1	96.41	11	456	1	446	2e-156	551	485	0.919588	0	0	0	0	0	0		Yang ZJ, Peng ZS, Wei SH, Liao ML, Yu Y, Jang ZY. Pistillody mutant reveals key insights into stamen and pistil development in wheat (Triticum aestivum L.). BMC Genomics. 2016;16:250.
comp103580_c0	TraesCSU02G012200.1	100	1	182	332	513	1e-106	383	182	1	0	0	0	0	0	0	MEgreen	Yang ZJ, Peng ZS, Wei SH, Liao ML, Yu Y, Jang ZY. Pistillody mutant reveals key insights into stamen and pistil development in wheat (Triticum aestivum L.). BMC Genomics. 2016;16:251.
comp120172_c1	TraesCS7B02G058500.1	99.61	28	541	1	514	0	790	541	0.950092	0	0	0	0	0	0		Yang ZJ, Peng ZS, Wei SH, Liao ML, Yu Y, Jang ZY. Pistillody mutant reveals key insights into stamen and pistil development in wheat (Triticum aestivum L.). BMC Genomics. 2016;16:252.
comp113361_c0	TraesCS4B02G054800.1	100	1	244	212	455	6e-102	368	244	1	0	0	0	0	0	0	MEgreen	Yang ZJ, Peng ZS, Wei SH, Liao ML, Yu Y, Jang ZY. Pistillody mutant reveals key insights into stamen and pistil development in wheat (Triticum aestivum L.). BMC Genomics. 2016;16:253.
comp104048_c0	TraesCS5B02G040800.1	100	14	282	1	269	3e-108	390	282	0.953901	0	0	0	0	0	0		Yang ZJ, Peng ZS, Wei SH, Liao ML, Yu Y, Jang ZY. Pistillody mutant reveals key insights into stamen and pistil development in wheat (Triticum aestivum L.). BMC Genomics. 2016;16:254.
comp151384_c0	TraesCS5D02G230700.1	99.77	5	442	1	438	0	742	442	0.99095	0	0	0	0	0	0		Yang ZJ, Peng ZS, Wei SH, Liao ML, Yu Y, Jang ZY. Pistillody mutant reveals key insights into stamen and pistil development in wheat (Triticum aestivum L.). BMC Genomics. 2016;16:255.
comp107585_c0	TraesCS1D02G365200.1	97.83	1	92	156	247	3e-45	178	92	1	0	0	0	0	0	0	MEgreen	Yang ZJ, Peng ZS, Wei SH, Liao ML, Yu Y, Jang ZY. Pistillody mutant reveals key insights into stamen and pistil development in wheat (Triticum aestivum L.). BMC Genomics. 2016;16:256.
comp109601_c0	TraesCS7D02G381000.1	100	5	135	1	131	5e-40	160	135	0.97037	0	0	0	0	0	0		Yang ZJ, Peng ZS, Wei SH, Liao ML, Yu Y, Jang ZY. Pistillody mutant reveals key insights into stamen and pistil development in wheat (Triticum aestivum L.). BMC Genomics. 2016;16:257.
comp105888_c0	TraesCS2D02G417400.1	100	74	110	32	68	1e-07	53.1	110	0.336364	0	0	0	0	0	0	MEgreen	Yang ZJ, Peng ZS, Wei SH, Liao ML, Yu Y, Jang ZY. Pistillody mutant reveals key insights into stamen and pistil development in wheat (Triticum aestivum L.). BMC Genomics. 2016;16:258.
comp112668_c1	TraesCS1D02G147800.1	100	1	246	374	619	5e-146	515	246	1	0	0	0	0	0	0	MEgreen	Yang ZJ, Peng ZS, Wei SH, Liao ML, Yu Y, Jang ZY. Pistillody mutant reveals key insights into stamen and pistil development in wheat (Triticum aestivum L.). BMC Genomics. 2016;16:259.
comp114987_c0	TraesCS4B02G155100.1	78.85	6	57	222	273	4e-20	94.7	61	0.852459	0	0	0	0	0	0		Yang ZJ, Peng ZS, Wei SH, Liao ML, Yu Y, Jang ZY. Pistillody mutant reveals key insights into stamen and pistil development in wheat (Triticum aestivum L.). BMC Genomics. 2016;16:260.
comp114326_c0	TraesCS3B02G372000.1	98.48	25	287	1	263	2e-144	510	287	0.916376	0	0	0	0	0	0		Yang ZJ, Peng ZS, Wei SH, Liao ML, Yu Y, Jang ZY. Pistillody mutant reveals key insights into stamen and pistil development in wheat (Triticum aestivum L.). BMC Genomics. 2016;16:261.
comp107733_c0	TraesCS6A02G307300.1	99.66	27	321	1	295	1e-159	561	321	0.919003	0	0	0	0	0	0	MEgreen	Yang ZJ, Peng ZS, Wei SH, Liao ML, Yu Y, Jang ZY. Pistillody mutant reveals key insights into stamen and pistil development in wheat (Triticum aestivum L.). BMC Genomics. 2016;16:262.
comp109925_c0	TraesCS5D02G539200.1	94.12	3	121	1	119	2e-46	182	126	0.944444	1	0	0	0	0	1		Yang ZJ, Peng ZS, Wei SH, Liao ML, Yu Y, Jang ZY. Pistillody mutant reveals key insights into stamen and pistil development in wheat (Triticum aestivum L.). BMC Genomics. 2016;16:247.
comp101546_c0	TraesCS5D02G291100.2	97.44	10	204	1	195	1e-51	201	204	0.955882	0	0	0	0	0	0		Yang ZJ, Peng ZS, Wei SH, Liao ML, Yu Y, Jang ZY. Pistillody mutant reveals key insights into stamen and pistil development in wheat (Triticum aestivum L.). BMC Genomics. 2016;16:264.
comp121453_c0	TraesCS4D02G318500.1	99.59	53	791	1	739	0	1435	792	0.933081	0	0	0	0	0	0		Yang ZJ, Peng ZS, Wei SH, Liao ML, Yu Y, Jang ZY. Pistillody mutant reveals key insights into stamen and pistil development in wheat (Triticum aestivum L.). BMC Genomics. 2016;16:265.
comp110810_c0	TraesCS5D02G261000.1	100	1	729	1	729	0	1532	729	1	0	0	0	0	0	0	MEgreen	Yang ZJ, Peng ZS, Wei SH, Liao ML, Yu Y, Jang ZY. Pistillody mutant reveals key insights into stamen and pistil development in wheat (Triticum aestivum L.). BMC Genomics. 2016;16:266.
comp100658_c0	TraesCS5D02G293400.1	100	1	113	514	626	5e-62	234	113	1	0	0	0	0	0	0		Yang ZJ, Peng ZS, Wei SH, Liao ML, Yu Y, Jang ZY. Pistillody mutant reveals key insights into stamen and pistil development in wheat (Triticum aestivum L.). BMC Genomics. 2016;16:267.
comp111548_c0	TraesCS2D02G437900.1	99.19	24	392	1	371	0	653	392	0.941327	0	0	0	0	0	0		Yang ZJ, Peng ZS, Wei SH, Liao ML, Yu Y, Jang ZY. Pistillody mutant reveals key insights into stamen and pistil development in wheat (Triticum aestivum L.). BMC Genomics. 2016;16:268.
comp121488_c1	TraesCS6D02G305200.1	100	1	92	240	331	2e-40	162	92	1	0	0	0	0	0	0	MEgreen	Yang ZJ, Peng ZS, Wei SH, Liao ML, Yu Y, Jang ZY. Pistillody mutant reveals key insights into stamen and pistil development in wheat (Triticum aestivum L.). BMC Genomics. 2016;16:269.
comp101676_c0	TraesCS3B02G136800.1	96	1	75	1180	1254	4e-25	111	75	1	0	0	0	0	0	0		Yang ZJ, Peng ZS, Wei SH, Liao ML, Yu Y, Jang ZY. Pistillody mutant reveals key insights into stamen and pistil development in wheat (Triticum aestivum L.). BMC Genomics. 2016;16:270.
comp101676_c0	TraesCS3B02G136800.1	52	1	75	528	602	1e-14	76.6	75	1	0	0	0	0	0	0		Yang ZJ, Peng ZS, Wei SH, Liao ML, Yu Y, Jang ZY. Pistillody mutant reveals key insights into stamen and pistil development in wheat (Triticum aestivum L.). BMC Genomics. 2016;16:271.
comp110800_c0	TraesCS1B02G354800.1	97.89	42	373	1	332	0	645	373	0.89008	0	0	0	0	0	0		Yang ZJ, Peng ZS, Wei SH, Liao ML, Yu Y, Jang ZY. Pistillody mutant reveals key insights into stamen and pistil development in wheat (Triticum aestivum L.). BMC Genomics. 2016;16:272.
comp114721_c0	TraesCS2A02G076100.1	96.34	77	457	46	428	0	721	457	0.833698	0	0	0	0	0	0	MEgreen	Yang ZJ, Peng ZS, Wei SH, Liao ML, Yu Y, Jang ZY. Pistillody mutant reveals key insights into stamen and pistil development in wheat (Triticum aestivum L.). BMC Genomics. 2016;16:273.
comp116379_c0	TraesCS6D02G142000.1	100	45	467	31	453	7e-136	482	467	0.905782	0	0	0	0	0	0		Yang ZJ, Peng ZS, Wei SH, Liao ML, Yu Y, Jang ZY. Pistillody mutant reveals key insights into stamen and pistil development in wheat (Triticum aestivum L.). BMC Genomics. 2016;16:274.
comp102345_c1	TraesCS3D02G300600.1	100	1	49	563	611	1e-23	106	49	1	0	0	0	0	0	0	MEgreen	Yang ZJ, Peng ZS, Wei SH, Liao ML, Yu Y, Jang ZY. Pistillody mutant reveals key insights into stamen and pistil development in wheat (Triticum aestivum L.). BMC Genomics. 2016;16:275.
comp106919_c0	TraesCS7B02G094200.1	98.21	11	122	1	112	1e-49	192	122	0.918033	0	0	0	0	0	0	MEgreen	Yang ZJ, Peng ZS, Wei SH, Liao ML, Yu Y, Jang ZY. Pistillody mutant reveals key insights into stamen and pistil development in wheat (Triticum aestivum L.). BMC Genomics. 2016;16:276.
comp114079_c0	TraesCS1D02G357500.1	97.06	25	160	340	475	4e-61	231	162	0.839506	0	0	0	0	0	0		Yang ZJ, Peng ZS, Wei SH, Liao ML, Yu Y, Jang ZY. Pistillody mutant reveals key insights into stamen and pistil development in wheat (Triticum aestivum L.). BMC Genomics. 2016;16:277.
comp111051_c2	TraesCS2B02G218700.1	100	1	66	500	565	4e-21	98.2	66	1	0	0	0	0	0	0		Yang ZJ, Peng ZS, Wei SH, Liao ML, Yu Y, Jang ZY. Pistillody mutant reveals key insights into stamen and pistil development in wheat (Triticum aestivum L.). BMC Genomics. 2016;16:278.
comp106919_c1	TraesCS7D02G190400.1	100	1	59	106	164	5e-15	78.2	78	0.75641	0	0	0	0	0	0	MEgreen	Yang ZJ, Peng ZS, Wei SH, Liao ML, Yu Y, Jang ZY. Pistillody mutant reveals key insights into stamen and pistil development in wheat (Triticum aestivum L.). BMC Genomics. 2016;16:279.
comp107500_c0	TraesCS6B02G282000.1	100	27	118	24	115	6e-36	149	207	0.444444	0	0	0	0	0	0		Yang ZJ, Peng ZS, Wei SH, Liao ML, Yu Y, Jang ZY. Pistillody mutant reveals key insights into stamen and pistil development in wheat (Triticum aestivum L.). BMC Genomics. 2016;16:280.
comp111939_c2	TraesCS2B02G608200.1	100	49	106	43	100	5e-22	102	207	0.280193	0	0	0	0	0	0	MEgreen	Yang ZJ, Peng ZS, Wei SH, Liao ML, Yu Y, Jang ZY. Pistillody mutant reveals key insights into stamen and pistil development in wheat (Triticum aestivum L.). BMC Genomics. 2016;16:281.
comp111939_c2	TraesCS2B02G608200.1	100	191	207	185	201	0.75	32.3	207	0.0821256	0	0	0	0	0	0	MEgreen	Yang ZJ, Peng ZS, Wei SH, Liao ML, Yu Y, Jang ZY. Pistillody mutant reveals key insights into stamen and pistil development in wheat (Triticum aestivum L.). BMC Genomics. 2016;16:282.
comp102644_c0	TraesCS3D02G531600.1	100	1	59	310	368	1e-29	126	59	1	0	0	0	0	0	0	MEgreen	Yang ZJ, Peng ZS, Wei SH, Liao ML, Yu Y, Jang ZY. Pistillody mutant reveals key insights into stamen and pistil development in wheat (Triticum aestivum L.). BMC Genomics. 2016;16:283.
comp123336_c0	TraesCS5D02G398300.1	100	1	38	633	670	6e-18	87.4	38	1	0	0	0	0	0	0		Yang ZJ, Peng ZS, Wei SH, Liao ML, Yu Y, Jang ZY. Pistillody mutant reveals key insights into stamen and pistil development in wheat (Triticum aestivum L.). BMC Genomics. 2016;16:284.
comp117315_c0	TraesCS6D02G235700.3	98.31	1	474	41	514	0	778	474	1	0	0	0	0	0	0		Yang ZJ, Peng ZS, Wei SH, Liao ML, Yu Y, Jang ZY. Pistillody mutant reveals key insights into stamen and pistil development in wheat (Triticum aestivum L.). BMC Genomics. 2016;16:285.
comp115018_c1	TraesCS5D02G297100.1	94.01	37	320	4	287	3e-116	417	320	0.8875	0	0	0	0	0	0	MEgreen	Yang ZJ, Peng ZS, Wei SH, Liao ML, Yu Y, Jang ZY. Pistillody mutant reveals key insights into stamen and pistil development in wheat (Triticum aestivum L.). BMC Genomics. 2016;16:286.
comp112020_c0	TraesCS2D02G392800.1	98.82	7	346	1	340	0	655	346	0.982659	0	0	0	0	0	0		Yang ZJ, Peng ZS, Wei SH, Liao ML, Yu Y, Jang ZY. Pistillody mutant reveals key insights into stamen and pistil development in wheat (Triticum aestivum L.). BMC Genomics. 2016;16:287.
comp106812_c0	TraesCS3B02G461700.1	97.4	31	107	1	77	9e-13	70.5	107	0.719626	0	0	0	0	0	0	MEgreen	Yang ZJ, Peng ZS, Wei SH, Liao ML, Yu Y, Jang ZY. Pistillody mutant reveals key insights into stamen and pistil development in wheat (Triticum aestivum L.). BMC Genomics. 2016;16:288.
comp121380_c0	TraesCS5D02G302900.1	95.32	32	522	27	512	0	937	522	0.940613	0	0	0	0	0	0	MEgreen	Yang ZJ, Peng ZS, Wei SH, Liao ML, Yu Y, Jang ZY. Pistillody mutant reveals key insights into stamen and pistil development in wheat (Triticum aestivum L.). BMC Genomics. 2016;16:289.
comp100368_c0	TraesCS6B02G413800.1	92.17	52	164	1	113	4e-42	169	211	0.535545	0	0	0	0	0	0	MEturquoise	Yang ZJ, Peng ZS, Wei SH, Liao ML, Yu Y, Jang ZY. Pistillody mutant reveals key insights into stamen and pistil development in wheat (Triticum aestivum L.). BMC Genomics. 2016;16:290.
comp134243_c0	TraesCS7A02G084800.1	100	17	385	1	369	0	720	385	0.958442	0	0	0	0	0	0		Yang ZJ, Peng ZS, Wei SH, Liao ML, Yu Y, Jang ZY. Pistillody mutant reveals key insights into stamen and pistil development in wheat (Triticum aestivum L.). BMC Genomics. 2016;16:291.
comp110199_c0	TraesCS2A02G119600.2	99.74	27	407	1	381	3e-168	590	407	0.936118	0	0	0	0	0	0		Yang ZJ, Peng ZS, Wei SH, Liao ML, Yu Y, Jang ZY. Pistillody mutant reveals key insights into stamen and pistil development in wheat (Triticum aestivum L.). BMC Genomics. 2016;16:292.
comp105103_c0	TraesCS1A02G232700.1	92	11	260	1	239	1e-129	461	278	0.899281	0	0	0	0	0	0	MEgreen	Yang ZJ, Peng ZS, Wei SH, Liao ML, Yu Y, Jang ZY. Pistillody mutant reveals key insights into stamen and pistil development in wheat (Triticum aestivum L.). BMC Genomics. 2016;16:293.
comp107828_c0	TraesCS1B02G348100.1	99.72	12	373	1	362	0	719	373	0.970509	0	0	0	0	0	0		Yang ZJ, Peng ZS, Wei SH, Liao ML, Yu Y, Jang ZY. Pistillody mutant reveals key insights into stamen and pistil development in wheat (Triticum aestivum L.). BMC Genomics. 2016;16:294.
comp114094_c0	TraesCS1A02G126100.1	99.46	32	401	1	370	0	715	401	0.922693	0	0	0	0	0	0	MEgreen	Sun QX, Qu JP, Yu Y, Yang ZJ,Wei SH, Wu YL, Yang Y, Peng ZS: TaEPFL1, an EPIDERMAL PATTERNING FACTOR-LIKE (EPFL) secreted peptide gene, is required for stamen development in wheat. Genetica (2019) 147:121–130
comp114094_c0	TraesCS7A02G123600.1	36.51	308	362	8	70	2.9	32	401	0.137157	0	0	0	0	0	0		Sun QX, Qu JP, Yu Y, Yang ZJ,Wei SH, Wu YL, Yang Y, Peng ZS: TaEPFL1, an EPIDERMAL PATTERNING FACTOR-LIKE (EPFL) secreted peptide gene, is required for stamen development in wheat. Genetica (2019) 147:121–130
comp102674_c0	TraesCS1A02G268100.1	41.46	27	108	1	76	3e-09	58.9	113	0.725664	0	0	0	0	0	0		Yang ZJ, Peng ZS, Wei SH, Liao ML, Yu Y, Jang ZY. Pistillody mutant reveals key insights into stamen and pistil development in wheat (Triticum aestivum L.). BMC Genomics. 2016;16:297.
comp108406_c0	TraesCS6D02G048400.1	100	15	617	1	603	0	1040	617	0.97731	0	0	0	0	0	0	MEgreen	Yang ZJ, Peng ZS, Wei SH, Liao ML, Yu Y, Jang ZY. Pistillody mutant reveals key insights into stamen and pistil development in wheat (Triticum aestivum L.). BMC Genomics. 2016;16:298.
comp113082_c0	TraesCS5A02G273400.1	96.58	3	265	1	263	1e-120	430	265	0.992453	0	0	0	0	0	0		Yang ZJ, Peng ZS, Wei SH, Liao ML, Yu Y, Jang ZY. Pistillody mutant reveals key insights into stamen and pistil development in wheat (Triticum aestivum L.). BMC Genomics. 2016;16:299.
comp111760_c3	TraesCS2D02G105100.1	100	1	33	604	636	1e-14	76.6	33	1	0	0	0	0	0	0		Yang ZJ, Peng ZS, Wei SH, Liao ML, Yu Y, Jang ZY. Pistillody mutant reveals key insights into stamen and pistil development in wheat (Triticum aestivum L.). BMC Genomics. 2016;16:300.
comp103741_c0	TraesCS4B02G397500.2	94.34	8	60	241	293	4e-24	107	79	0.670886	0	0	0	0	0	0		Yang ZJ, Peng ZS, Wei SH, Liao ML, Yu Y, Jang ZY. Pistillody mutant reveals key insights into stamen and pistil development in wheat (Triticum aestivum L.). BMC Genomics. 2016;16:301.
comp103741_c0	TraesCS4B02G397500.2	81.54	32	96	55	119	5e-24	108	79	0.822785	0	0	0	0	0	0		Yang ZJ, Peng ZS, Wei SH, Liao ML, Yu Y, Jang ZY. Pistillody mutant reveals key insights into stamen and pistil development in wheat (Triticum aestivum L.). BMC Genomics. 2016;16:303.
comp119714_c0	TraesCS7A02G041300.1	99.63	71	871	1	801	0	1553	871	0.919633	0	0	0	0	0	0		Yang ZJ, Peng ZS, Wei SH, Liao ML, Yu Y, Jang ZY. Pistillody mutant reveals key insights into stamen and pistil development in wheat (Triticum aestivum L.). BMC Genomics. 2016;16:304.
comp97025_c0	TraesCS2A02G320600.1	58.21	42	108	23	89	1e-15	80.1	113	0.59292	0	0	0	0	0	0	MEgreen	Yang ZJ, Peng ZS, Wei SH, Liao ML, Yu Y, Jang ZY. Pistillody mutant reveals key insights into stamen and pistil development in wheat (Triticum aestivum L.). BMC Genomics. 2016;16:305.
comp99522_c0	TraesCS4B02G333700.1	100	1	108	421	528	6e-58	220	108	1	0	0	0	0	0	0		Yang ZJ, Peng ZS, Wei SH, Liao ML, Yu Y, Jang ZY. Pistillody mutant reveals key insights into stamen and pistil development in wheat (Triticum aestivum L.). BMC Genomics. 2016;16:306.
comp96190_c0	TraesCS1D02G149700.1	100	9	246	1	238	5e-134	475	260	0.915385	0	0	0	0	0	0		Yang ZJ, Peng ZS, Wei SH, Liao ML, Yu Y, Jang ZY. Pistillody mutant reveals key insights into stamen and pistil development in wheat (Triticum aestivum L.). BMC Genomics. 2016;16:307.
comp93539_c0	TraesCS7D02G452200.1	94.21	36	551	1	518	0	899	560	0.921429	0	0	0	0	0	0		Yang ZJ, Peng ZS, Wei SH, Liao ML, Yu Y, Jang ZY. Pistillody mutant reveals key insights into stamen and pistil development in wheat (Triticum aestivum L.). BMC Genomics. 2016;16:308.
comp93539_c0	TraesCS7A02G464600.1	92.21	3	79	448	524	2e-36	149	560	0.1375	0	0	0	0	0	0		Yang ZJ, Peng ZS, Wei SH, Liao ML, Yu Y, Jang ZY. Pistillody mutant reveals key insights into stamen and pistil development in wheat (Triticum aestivum L.). BMC Genomics. 2016;16:309.
comp94857_c0	TraesCS6D02G160000.1	100	29	158	1	130	4e-50	195	158	0.822785	0	0	0	0	0	0		Yang ZJ, Peng ZS, Wei SH, Liao ML, Yu Y, Jang ZY. Pistillody mutant reveals key insights into stamen and pistil development in wheat (Triticum aestivum L.). BMC Genomics. 2016;16:310.
comp96975_c0	TraesCS3D02G390200.1	100	31	305	1	275	1e-33	142	305	0.901639	0	0	0	0	0	0		Yang ZJ, Peng ZS, Wei SH, Liao ML, Yu Y, Jang ZY. Pistillody mutant reveals key insights into stamen and pistil development in wheat (Triticum aestivum L.). BMC Genomics. 2016;16:311.
comp97007_c0	TraesCS7B02G194900.1	100	1	43	76	118	4e-17	84.7	43	1	0	0	0	0	0	0	MEgreen	Yang ZJ, Peng ZS, Wei SH, Liao ML, Yu Y, Jang ZY. Pistillody mutant reveals key insights into stamen and pistil development in wheat (Triticum aestivum L.). BMC Genomics. 2016;16:312.
comp86141_c0	TraesCS2A02G367700.1	100	21	263	1	243	8e-135	478	263	0.923954	0	0	0	0	0	0		Yang ZJ, Peng ZS, Wei SH, Liao ML, Yu Y, Jang ZY. Pistillody mutant reveals key insights into stamen and pistil development in wheat (Triticum aestivum L.). BMC Genomics. 2016;16:313.
comp111285_c0	TraesCS6A02G106000.2	93.06	1	173	20	192	1e-60	230	173	1	0	0	0	0	0	1	MEgreen	Yang ZJ, Peng ZS, Wei SH, Liao ML, Yu Y, Jang ZY. Pistillody mutant reveals key insights into stamen and pistil development in wheat (Triticum aestivum L.). BMC Genomics. 2016;16:263.
comp99613_c0	TraesCS3A02G232300.1	100	1	85	759	843	1e-46	182	85	1	0	0	0	0	0	0	MEgreen	Yang ZJ, Peng ZS, Wei SH, Liao ML, Yu Y, Jang ZY. Pistillody mutant reveals key insights into stamen and pistil development in wheat (Triticum aestivum L.). BMC Genomics. 2016;16:315.
comp86311_c0	TraesCS6A02G351900.1	100	5	384	1	380	0	747	384	0.989583	0	0	0	0	0	0		Yang ZJ, Peng ZS, Wei SH, Liao ML, Yu Y, Jang ZY. Pistillody mutant reveals key insights into stamen and pistil development in wheat (Triticum aestivum L.). BMC Genomics. 2016;16:316.
comp94850_c0	TraesCS2B02G014900.1	72.84	21	436	104	505	2e-161	567	442	0.941176	0	0	0	0	0	0	MEturquoise	Yang ZJ, Peng ZS, Wei SH, Liao ML, Yu Y, Jang ZY. Pistillody mutant reveals key insights into stamen and pistil development in wheat (Triticum aestivum L.). BMC Genomics. 2016;16:317.
comp99455_c0	TraesCS6A02G094200.1	98.33	1	60	255	314	5e-29	124	60	1	0	0	0	0	0	0		Yang ZJ, Peng ZS, Wei SH, Liao ML, Yu Y, Jang ZY. Pistillody mutant reveals key insights into stamen and pistil development in wheat (Triticum aestivum L.). BMC Genomics. 2016;16:318.
comp62166_c0	TraesCS4A02G018500.1	99.77	21	451	1	431	0	717	452	0.95354	0	0	0	0	0	0		Yang ZJ, Peng ZS, Wei SH, Liao ML, Yu Y, Jang ZY. Pistillody mutant reveals key insights into stamen and pistil development in wheat (Triticum aestivum L.). BMC Genomics. 2016;16:319.
comp84998_c0	TraesCS3D02G413600.1	100	75	499	22	446	0	817	508	0.836614	0	0	0	0	0	0	MEturquoise	Yang ZJ, Peng ZS, Wei SH, Liao ML, Yu Y, Jang ZY. Pistillody mutant reveals key insights into stamen and pistil development in wheat (Triticum aestivum L.). BMC Genomics. 2016;16:320.
comp98995_c0	TraesCS4D02G361900.1	100	4	157	1	154	4e-64	241	157	0.980892	0	0	0	0	0	0	MEturquoise	Yang ZJ, Peng ZS, Wei SH, Liao ML, Yu Y, Jang ZY. Pistillody mutant reveals key insights into stamen and pistil development in wheat (Triticum aestivum L.). BMC Genomics. 2016;16:321.
comp95161_c0	TraesCS5D02G094300.1	100	6	151	1	146	4e-67	251	151	0.966887	0	0	0	0	0	0		Yang ZJ, Peng ZS, Wei SH, Liao ML, Yu Y, Jang ZY. Pistillody mutant reveals key insights into stamen and pistil development in wheat (Triticum aestivum L.). BMC Genomics. 2016;16:322.
comp36800_c0	TraesCS3A02G123400.1	60	67	179	25	143	1e-17	88.6	231	0.489177	0	0	0	0	0	0		Yang ZJ, Peng ZS, Wei SH, Liao ML, Yu Y, Jang ZY. Pistillody mutant reveals key insights into stamen and pistil development in wheat (Triticum aestivum L.). BMC Genomics. 2016;16:323.
comp83842_c0	TraesCS4D02G189800.1	98.51	50	116	60	126	6e-22	100	116	0.577586	0	0	0	0	0	0	MEturquoise	Yang ZJ, Peng ZS, Wei SH, Liao ML, Yu Y, Jang ZY. Pistillody mutant reveals key insights into stamen and pistil development in wheat (Triticum aestivum L.). BMC Genomics. 2016;16:324.
comp97806_c0	TraesCS5B02G056500.1	100	25	88	19	82	3e-25	112	89	0.719101	0	0	0	0	0	0	MEturquoise	Yang ZJ, Peng ZS, Wei SH, Liao ML, Yu Y, Jang ZY. Pistillody mutant reveals key insights into stamen and pistil development in wheat (Triticum aestivum L.). BMC Genomics. 2016;16:325.
comp85212_c0	TraesCS5A02G077400.1	100	26	161	24	159	7e-62	234	162	0.839506	0	0	0	0	0	0	MEturquoise	Yang ZJ, Peng ZS, Wei SH, Liao ML, Yu Y, Jang ZY. Pistillody mutant reveals key insights into stamen and pistil development in wheat (Triticum aestivum L.). BMC Genomics. 2016;16:326.
comp95861_c1	TraesCS5B02G508400.1	40	41	85	28	72	0.0002	43.1	86	0.523256	0	0	0	0	0	0		Yang ZJ, Peng ZS, Wei SH, Liao ML, Yu Y, Jang ZY. Pistillody mutant reveals key insights into stamen and pistil development in wheat (Triticum aestivum L.). BMC Genomics. 2016;16:327.
comp92139_c0	TraesCS3B02G193900.1	100	20	438	1	419	0	724	439	0.954442	0	0	0	0	0	0		Yang ZJ, Peng ZS, Wei SH, Liao ML, Yu Y, Jang ZY. Pistillody mutant reveals key insights into stamen and pistil development in wheat (Triticum aestivum L.). BMC Genomics. 2016;16:328.
comp93790_c0	TraesCS4D02G189800.1	98.7	1	77	195	271	3e-10	62	78	0.987179	0	0	0	0	0	0	MEturquoise	Yang ZJ, Peng ZS, Wei SH, Liao ML, Yu Y, Jang ZY. Pistillody mutant reveals key insights into stamen and pistil development in wheat (Triticum aestivum L.). BMC Genomics. 2016;16:329.
comp93310_c0	TraesCS6B02G024600.1	100	25	112	1	88	2e-28	122	113	0.778761	0	0	0	0	0	0		Yang ZJ, Peng ZS, Wei SH, Liao ML, Yu Y, Jang ZY. Pistillody mutant reveals key insights into stamen and pistil development in wheat (Triticum aestivum L.). BMC Genomics. 2016;16:330.
comp86133_c0	TraesCS4A02G377300.1	100	28	358	16	346	0	687	359	0.922006	0	0	0	0	0	0	MEyellow	Yang ZJ, Peng ZS, Wei SH, Liao ML, Yu Y, Jang ZY. Pistillody mutant reveals key insights into stamen and pistil development in wheat (Triticum aestivum L.). BMC Genomics. 2016;16:331.
comp123359_c0	TraesCS2D02G340400.1	99.9	12	988	1	977	0	1793	989	0.987867	0	0	0	0	0	0		Yang ZJ, Peng ZS, Wei SH, Liao ML, Yu Y, Jang ZY. Pistillody mutant reveals key insights into stamen and pistil development in wheat (Triticum aestivum L.). BMC Genomics. 2016;16:332.
comp110936_c0	TraesCS3D02G530100.1	76.63	20	472	18	522	2e-69	262	473	0.957717	0	0	0	0	0	0	MEturquoise	Yang ZJ, Peng ZS, Wei SH, Liao ML, Yu Y, Jang ZY. Pistillody mutant reveals key insights into stamen and pistil development in wheat (Triticum aestivum L.). BMC Genomics. 2016;16:333.
comp120749_c0	TraesCS7A02G302800.1	98.57	17	645	1	629	0	1087	646	0.973684	0	0	0	0	0	0		Yang ZJ, Peng ZS, Wei SH, Liao ML, Yu Y, Jang ZY. Pistillody mutant reveals key insights into stamen and pistil development in wheat (Triticum aestivum L.). BMC Genomics. 2016;16:334.
comp123386_c1	TraesCS2A02G397200.1	99.41	44	894	1	851	0	1206	894	0.951902	1	0	1	1	1	1	MEturquoise	Yang ZJ, Peng ZS, Wei SH, Liao ML, Yu Y, Jang ZY. Pistillody mutant reveals key insights into stamen and pistil development in wheat (Triticum aestivum L.). BMC Genomics. 2016;16:335.
comp113310_c0	TraesCS5D02G195500.1	99.73	15	388	12	385	0	743	388	0.963918	0	0	0	0	0	1	MEturquoise	Yang ZJ, Peng ZS, Wei SH, Liao ML, Yu Y, Jang ZY. Pistillody mutant reveals key insights into stamen and pistil development in wheat (Triticum aestivum L.). BMC Genomics. 2016;16:336.
comp121034_c0	TraesCS3D02G354200.1	98.86	1	526	53	578	0	960	527	0.998102	0	0	0	0	0	0		Yang ZJ, Peng ZS, Wei SH, Liao ML, Yu Y, Jang ZY. Pistillody mutant reveals key insights into stamen and pistil development in wheat (Triticum aestivum L.). BMC Genomics. 2016;16:337.
comp110264_c1	TraesCS5D02G209700.1	99.04	1	208	136	343	2e-110	396	209	0.995215	0	0	0	0	0	0	MEturquoise	Yang ZJ, Peng ZS, Wei SH, Liao ML, Yu Y, Jang ZY. Pistillody mutant reveals key insights into stamen and pistil development in wheat (Triticum aestivum L.). BMC Genomics. 2016;16:338.
comp123058_c0	TraesCS1D02G265000.1	97.77	3	899	1	897	0	1481	901	0.99556	0	0	0	0	0	0		Yang ZJ, Peng ZS, Wei SH, Liao ML, Yu Y, Jang ZY. Pistillody mutant reveals key insights into stamen and pistil development in wheat (Triticum aestivum L.). BMC Genomics. 2016;16:339.
comp117613_c1	TraesCS1D02G427400.1	100	17	170	1	154	8e-87	317	170	0.905882	0	0	0	0	0	0		Yang ZJ, Peng ZS, Wei SH, Liao ML, Yu Y, Jang ZY. Pistillody mutant reveals key insights into stamen and pistil development in wheat (Triticum aestivum L.). BMC Genomics. 2016;16:340.
comp110106_c0	TraesCS1A02G176300.1	100	32	316	13	297	8e-100	362	317	0.899054	0	0	0	0	0	0	MEturquoise	Yang ZJ, Peng ZS, Wei SH, Liao ML, Yu Y, Jang ZY. Pistillody mutant reveals key insights into stamen and pistil development in wheat (Triticum aestivum L.). BMC Genomics. 2016;16:341.
comp119100_c0	TraesCS2D02G464900.1	100	75	603	1	529	0	836	604	0.875828	0	0	0	0	0	1		Yang ZJ, Peng ZS, Wei SH, Liao ML, Yu Y, Jang ZY. Pistillody mutant reveals key insights into stamen and pistil development in wheat (Triticum aestivum L.). BMC Genomics. 2016;16:342.
comp118341_c0	TraesCS1A02G360700.2	100	50	522	26	498	0	886	523	0.904398	0	0	0	0	1	0	MEturquoise	Yang ZJ, Peng ZS, Wei SH, Liao ML, Yu Y, Jang ZY. Pistillody mutant reveals key insights into stamen and pistil development in wheat (Triticum aestivum L.). BMC Genomics. 2016;16:343.
comp116835_c0	TraesCS3D02G143300.1	100	42	588	1	547	0	1039	589	0.928693	0	0	0	0	0	1	MEturquoise	Yang ZJ, Peng ZS, Wei SH, Liao ML, Yu Y, Jang ZY. Pistillody mutant reveals key insights into stamen and pistil development in wheat (Triticum aestivum L.). BMC Genomics. 2016;16:344.
comp113050_c0	TraesCS1A02G365200.1	98.61	46	477	28	459	0	832	478	0.903766	0	0	0	0	0	0	MEturquoise	Yang ZJ, Peng ZS, Wei SH, Liao ML, Yu Y, Jang ZY. Pistillody mutant reveals key insights into stamen and pistil development in wheat (Triticum aestivum L.). BMC Genomics. 2016;16:345.
comp108229_c0	TraesCS1A02G262700.1	93.93	1	245	30	275	2e-101	366	246	0.995935	0	1	1	1	1	1	MEturquoise	Yang ZJ, Peng ZS, Wei SH, Liao ML, Yu Y, Jang ZY. Pistillody mutant reveals key insights into stamen and pistil development in wheat (Triticum aestivum L.). BMC Genomics. 2016;16:346.
comp115385_c0	TraesCS6A02G287600.1	95.47	30	292	1	265	5e-97	352	293	0.897611	0	0	0	0	0	1		Yang ZJ, Peng ZS, Wei SH, Liao ML, Yu Y, Jang ZY. Pistillody mutant reveals key insights into stamen and pistil development in wheat (Triticum aestivum L.). BMC Genomics. 2016;16:347.
comp113041_c0	TraesCS3D02G400500.1	97.55	61	344	1	286	1e-136	484	345	0.823188	0	0	0	0	0	0		Yang ZJ, Peng ZS, Wei SH, Liao ML, Yu Y, Jang ZY. Pistillody mutant reveals key insights into stamen and pistil development in wheat (Triticum aestivum L.). BMC Genomics. 2016;16:348.
comp107249_c0	TraesCS1B02G477900.1	98.28	2	409	23	424	0	741	410	0.995122	0	0	0	0	0	1		Yang ZJ, Peng ZS, Wei SH, Liao ML, Yu Y, Jang ZY. Pistillody mutant reveals key insights into stamen and pistil development in wheat (Triticum aestivum L.). BMC Genomics. 2016;16:349.
comp122072_c0	TraesCS7D02G175000.1	98.01	33	838	15	819	0	1358	839	0.960667	0	0	0	0	0	0	MEturquoise	Yang ZJ, Peng ZS, Wei SH, Liao ML, Yu Y, Jang ZY. Pistillody mutant reveals key insights into stamen and pistil development in wheat (Triticum aestivum L.). BMC Genomics. 2016;16:350.
comp105479_c0	TraesCS3A02G351400.2	100	60	438	1	379	0	765	439	0.863326	0	0	0	0	0	0	MEturquoise	Yang ZJ, Peng ZS, Wei SH, Liao ML, Yu Y, Jang ZY. Pistillody mutant reveals key insights into stamen and pistil development in wheat (Triticum aestivum L.). BMC Genomics. 2016;16:351.
comp122074_c0	TraesCS3A02G220700.1	98.7	185	1187	55	1056	0	1833	1188	0.844276	0	0	0	0	0	0	MEturquoise	Yang ZJ, Peng ZS, Wei SH, Liao ML, Yu Y, Jang ZY. Pistillody mutant reveals key insights into stamen and pistil development in wheat (Triticum aestivum L.). BMC Genomics. 2016;16:352.
comp116703_c0	TraesCS5A02G130900.1	99.33	46	790	1	745	0	1091	791	0.941846	0	0	1	1	1	1		Yang ZJ, Peng ZS, Wei SH, Liao ML, Yu Y, Jang ZY. Pistillody mutant reveals key insights into stamen and pistil development in wheat (Triticum aestivum L.). BMC Genomics. 2016;16:353.
comp119404_c0	TraesCS4A02G038500.1	100	53	562	1	510	0	1033	563	0.905861	0	0	0	0	0	1		Yang ZJ, Peng ZS, Wei SH, Liao ML, Yu Y, Jang ZY. Pistillody mutant reveals key insights into stamen and pistil development in wheat (Triticum aestivum L.). BMC Genomics. 2016;16:354.
comp109492_c0	TraesCS6D02G296500.1	100	40	159	1	120	1e-44	177	160	0.75	0	0	0	0	0	0		Sun QX, Qu JP, Yu Y, Yang ZJ,Wei SH, Wu YL, Yang Y, Peng ZS: TaEPFL1, an EPIDERMAL PATTERNING FACTOR-LIKE (EPFL) secreted peptide gene, is required for stamen development in wheat. Genetica (2019) 147:121–130	TaEPFL1 gene
comp114327_c0	TraesCS1A02G103100.1	98.25	43	270	1	228	7e-64	242	284	0.802817	1	0	0	0	0	1	MEturquoise	Yang ZJ, Peng ZS, Wei SH, Liao ML, Yu Y, Jang ZY. Pistillody mutant reveals key insights into stamen and pistil development in wheat (Triticum aestivum L.). BMC Genomics. 2016;16:356.
comp111949_c1	TraesCS6A02G139700.1	98.84	13	271	1	259	1e-109	394	272	0.952206	0	0	0	0	0	1	MEturquoise	Yang ZJ, Peng ZS, Wei SH, Liao ML, Yu Y, Jang ZY. Pistillody mutant reveals key insights into stamen and pistil development in wheat (Triticum aestivum L.). BMC Genomics. 2016;16:357.
comp122566_c0	TraesCS2D02G209200.1	96.39	47	378	1	331	3e-127	453	379	0.875989	0	0	0	0	0	0	MEturquoise	Yang ZJ, Peng ZS, Wei SH, Liao ML, Yu Y, Jang ZY. Pistillody mutant reveals key insights into stamen and pistil development in wheat (Triticum aestivum L.). BMC Genomics. 2016;16:358.
comp113043_c0	TraesCS7A02G492400.1	100	1	144	489	632	1e-72	269	145	0.993103	0	1	0	0	0	1	MEturquoise	Yang ZJ, Peng ZS, Wei SH, Liao ML, Yu Y, Jang ZY. Pistillody mutant reveals key insights into stamen and pistil development in wheat (Triticum aestivum L.). BMC Genomics. 2016;16:359.
comp112313_c0	TraesCS6A02G237700.1	99.59	18	258	10	250	6e-109	392	259	0.930502	0	0	1	1	1	1	MEyellow	Yang ZJ, Peng ZS, Wei SH, Liao ML, Yu Y, Jang ZY. Pistillody mutant reveals key insights into stamen and pistil development in wheat (Triticum aestivum L.). BMC Genomics. 2016;16:360.
comp113918_c0	TraesCS6D02G315700.1	99.64	1	278	137	414	2e-97	353	279	0.996416	0	0	0	0	0	1	MEturquoise	Yang ZJ, Peng ZS, Wei SH, Liao ML, Yu Y, Jang ZY. Pistillody mutant reveals key insights into stamen and pistil development in wheat (Triticum aestivum L.). BMC Genomics. 2016;16:361.
comp117947_c0	TraesCS5B02G023000.2	98.56	65	341	22	298	6e-134	475	342	0.809942	0	0	0	0	0	1		Yang ZJ, Peng ZS, Wei SH, Liao ML, Yu Y, Jang ZY. Pistillody mutant reveals key insights into stamen and pistil development in wheat (Triticum aestivum L.). BMC Genomics. 2016;16:362.
comp113292_c0	TraesCS2B02G382900.2	98.03	33	336	21	324	2e-165	580	337	0.902077	0	0	0	0	0	0		Yang ZJ, Peng ZS, Wei SH, Liao ML, Yu Y, Jang ZY. Pistillody mutant reveals key insights into stamen and pistil development in wheat (Triticum aestivum L.). BMC Genomics. 2016;16:363.
comp119301_c0	TraesCS5D02G165900.1	99.72	44	397	1	354	3e-112	404	398	0.889447	0	0	0	0	0	0	MEturquoise	Yang ZJ, Peng ZS, Wei SH, Liao ML, Yu Y, Jang ZY. Pistillody mutant reveals key insights into stamen and pistil development in wheat (Triticum aestivum L.). BMC Genomics. 2016;16:364.
comp111376_c0	TraesCS6A02G315700.1	93.35	10	325	1	307	4e-99	360	326	0.969325	0	0	0	0	0	0		Yang ZJ, Peng ZS, Wei SH, Liao ML, Yu Y, Jang ZY. Pistillody mutant reveals key insights into stamen and pistil development in wheat (Triticum aestivum L.). BMC Genomics. 2016;16:365.
comp119576_c0	TraesCS5D02G391200.1	96.58	10	122	1	117	2e-30	129	140	0.807143	0	0	0	0	0	0	MEturquoise	Yang ZJ, Peng ZS, Wei SH, Liao ML, Yu Y, Jang ZY. Pistillody mutant reveals key insights into stamen and pistil development in wheat (Triticum aestivum L.). BMC Genomics. 2016;16:366.
comp117360_c0	TraesCS3D02G502600.1	95.02	13	1136	30	1141	0	1629	1137	0.988566	1	0	1	1	1	0	MEturquoise	Yang ZJ, Peng ZS, Wei SH, Liao ML, Yu Y, Jang ZY. Pistillody mutant reveals key insights into stamen and pistil development in wheat (Triticum aestivum L.). BMC Genomics. 2016;16:367.
comp121204_c0	TraesCS2B02G236400.1	99.42	19	887	1	869	0	1707	888	0.978604	0	0	0	0	0	1		Yang ZJ, Peng ZS, Wei SH, Liao ML, Yu Y, Jang ZY. Pistillody mutant reveals key insights into stamen and pistil development in wheat (Triticum aestivum L.). BMC Genomics. 2016;16:368.
comp113062_c0	TraesCS1D02G412300.1	100	23	784	1	762	0	1420	785	0.970701	0	0	0	0	0	0	MEturquoise	Yang ZJ, Peng ZS, Wei SH, Liao ML, Yu Y, Jang ZY. Pistillody mutant reveals key insights into stamen and pistil development in wheat (Triticum aestivum L.). BMC Genomics. 2016;16:369.
comp111868_c0	TraesCS1D02G208400.1	99.57	12	243	1	232	4e-94	342	244	0.95082	0	0	0	0	0	1	MEturquoise	Yang ZJ, Peng ZS, Wei SH, Liao ML, Yu Y, Jang ZY. Pistillody mutant reveals key insights into stamen and pistil development in wheat (Triticum aestivum L.). BMC Genomics. 2016;16:370.
comp108539_c0	TraesCS2B02G444200.2	99.72	34	390	13	369	8e-175	612	391	0.913043	0	0	0	0	0	0	MEturquoise	Yang ZJ, Peng ZS, Wei SH, Liao ML, Yu Y, Jang ZY. Pistillody mutant reveals key insights into stamen and pistil development in wheat (Triticum aestivum L.). BMC Genomics. 2016;16:371.
comp144486_c0	TraesCSU02G092700.1	100	84	570	1	487	0	947	571	0.85289	0	0	0	0	0	0	MEwhite	Yang ZJ, Peng ZS, Wei SH, Liao ML, Yu Y, Jang ZY. Pistillody mutant reveals key insights into stamen and pistil development in wheat (Triticum aestivum L.). BMC Genomics. 2016;16:372.
comp119135_c0	TraesCS4D02G195100.1	98.72	35	581	1	547	0	1078	627	0.872408	0	0	0	0	0	0	MEturquoise	Yang ZJ, Peng ZS, Wei SH, Liao ML, Yu Y, Jang ZY. Pistillody mutant reveals key insights into stamen and pistil development in wheat (Triticum aestivum L.). BMC Genomics. 2016;16:373.
comp110066_c0	TraesCS4D02G245300.2	99.5	23	222	1	200	2e-93	340	223	0.896861	0	1	1	1	1	1		Yang ZJ, Peng ZS, Wei SH, Liao ML, Yu Y, Jang ZY. Pistillody mutant reveals key insights into stamen and pistil development in wheat (Triticum aestivum L.). BMC Genomics. 2016;16:374.
comp115245_c0	TraesCS3B02G293200.1	100	29	328	21	320	1e-143	508	329	0.911854	0	0	0	0	0	1		Yang ZJ, Peng ZS, Wei SH, Liao ML, Yu Y, Jang ZY. Pistillody mutant reveals key insights into stamen and pistil development in wheat (Triticum aestivum L.). BMC Genomics. 2016;16:375.
comp109228_c0	TraesCSU02G103000.1	100	10	247	1	238	2e-123	440	247	0.963563	0	0	0	0	0	0	MEturquoise	Yang ZJ, Peng ZS, Wei SH, Liao ML, Yu Y, Jang ZY. Pistillody mutant reveals key insights into stamen and pistil development in wheat (Triticum aestivum L.). BMC Genomics. 2016;16:376.
comp117062_c0	TraesCS3D02G153200.1	93.51	3	372	1	351	3e-162	570	373	0.991957	0	0	0	0	0	0		Yang ZJ, Peng ZS, Wei SH, Liao ML, Yu Y, Jang ZY. Pistillody mutant reveals key insights into stamen and pistil development in wheat (Triticum aestivum L.). BMC Genomics. 2016;16:377.
comp110264_c0	TraesCS5A02G203300.1	100	55	160	29	134	2e-54	209	160	0.6625	0	0	0	0	0	0	MEturquoise	Yang ZJ, Peng ZS, Wei SH, Liao ML, Yu Y, Jang ZY. Pistillody mutant reveals key insights into stamen and pistil development in wheat (Triticum aestivum L.). BMC Genomics. 2016;16:378.
comp110651_c0	TraesCS7D02G462400.1	65.36	74	364	1	331	6e-76	283	366	0.795082	0	0	0	0	0	0	MEturquoise	Yang ZJ, Peng ZS, Wei SH, Liao ML, Yu Y, Jang ZY. Pistillody mutant reveals key insights into stamen and pistil development in wheat (Triticum aestivum L.). BMC Genomics. 2016;16:379.
comp123488_c0	TraesCS2B02G341800.2	96.92	42	1179	26	1163	0	1965	1179	0.965225	0	1	0	0	1	1	MEturquoise	Yang ZJ, Peng ZS, Wei SH, Liao ML, Yu Y, Jang ZY. Pistillody mutant reveals key insights into stamen and pistil development in wheat (Triticum aestivum L.). BMC Genomics. 2016;16:380.
comp123488_c0	TraesCS2B02G341800.2	39.64	82	630	714	1260	3e-90	332	1179	0.465649	0	1	0	0	1	1	MEturquoise	Yang ZJ, Peng ZS, Wei SH, Liao ML, Yu Y, Jang ZY. Pistillody mutant reveals key insights into stamen and pistil development in wheat (Triticum aestivum L.). BMC Genomics. 2016;16:381.
comp113007_c0	TraesCS3B02G157800.1	96.49	19	388	1	365	2e-121	434	423	0.874704	0	0	0	0	0	1	MEturquoise	Yang ZJ, Peng ZS, Wei SH, Liao ML, Yu Y, Jang ZY. Pistillody mutant reveals key insights into stamen and pistil development in wheat (Triticum aestivum L.). BMC Genomics. 2016;16:382.
comp113043_c1	TraesCS3B02G260700.1	93.96	2	266	341	601	4e-130	462	267	0.992509	0	1	0	0	0	1		Yang ZJ, Peng ZS, Wei SH, Liao ML, Yu Y, Jang ZY. Pistillody mutant reveals key insights into stamen and pistil development in wheat (Triticum aestivum L.). BMC Genomics. 2016;16:383.
comp118851_c1	TraesCS5D02G146000.1	100	22	647	5	630	0	1179	661	0.94705	0	0	0	0	0	1		Yang ZJ, Peng ZS, Wei SH, Liao ML, Yu Y, Jang ZY. Pistillody mutant reveals key insights into stamen and pistil development in wheat (Triticum aestivum L.). BMC Genomics. 2016;16:384.
