# Supplementary material for: Co-expression network analysis of genes and networks associated with wheat pistillody
Source: PeerJ. 2022 Aug 24;10:e13902. doi: 10.7717/peerj.13902 (PMC9419718; doi:10.7717/peerj.13902)
Supplement: Table S3 [file peerj-10-13902-s003.xlsx]

## Sheet: Table S3
Family	ID	Hub gene of MEturquoise module	carpel development (GO:0048440)	gynoecium development (GO:0048467)	stamen development (GO:0048443）	androecium development (GO:0048466)	flower development (GO:0009908)	floral organ development (GO:0048437)	maintenance of floral organ identity (GO:0048497)	floral whorl development (GO:0048438)	specification of floral organ identity (GO:0010093)	floral organ morphogenesis (GO:0048444)	floral meristem growth (GO:0010451)	floral organ formation (GO:0048449)	specification of floral organ number (GO:0048833)	regulation of floral meristem growth (GO:0010080)	maintenance of floral meristem identity (GO:0010076)	plant-type ovary development (GO:0035670)	petal development (GO:0048441)	Related wheat flower development
AP2/ERF	TraesCS5A02G141700.1	0	0	0	0	0	0	0	0	0	0	0	0	0	0	0	0	0	0	0
AP2/ERF	TraesCS2D02G256600.2	0	0	0	0	0	0	0	0	0	0	0	0	0	0	0	0	0	0	0
AP2/ERF	TraesCS2B02G268100.2	0	0	0	0	0	0	0	0	0	0	0	0	0	0	0	0	0	0	0
AP2/ERF	TraesCS2A02G267600.2	0	0	0	0	0	0	0	0	0	0	0	0	0	0	0	0	0	0	0
AP2/ERF	TraesCS7D02G512600.1	1	0	0	0	0	0	0	0	0	0	0	0	0	0	0	0	0	0	0
AP2/ERF	TraesCS5A02G221600.1	0	0	0	0	0	0	0	0	0	0	0	0	0	0	0	0	0	0	0
AP2/ERF	TraesCS5B02G220400.2	0	0	0	0	0	0	0	0	0	0	0	0	0	0	0	0	0	0	0
AP2/ERF	TraesCS3B02G368400.1	0	0	0	0	0	1	0	0	0	0	0	1	0	0	1	0	0	0	3
AP2/ERF	TraesCS5D02G415500.1	0	0	0	0	0	0	0	0	0	0	0	0	0	0	0	0	0	0	0
AP2/ERF	TraesCS2A02G514200.1	0	0	0	0	0	1	1	0	0	1	1	1	1	0	1	0	0	0	7
AP2/ERF	TraesCS2B02G542400.2	0	0	0	0	0	1	1	0	0	1	1	1	1	0	1	0	0	0	7
AP2/ERF	TraesCS5B02G410200.1	0	0	0	0	0	0	0	0	0	0	0	0	0	0	0	0	0	0	0
AP2/ERF	TraesCS5B02G220400.1	0	0	0	0	0	0	0	0	0	0	0	0	0	0	0	0	0	0	0
AP2/ERF	TraesCS3D02G330400.1	0	0	0	0	0	1	0	0	0	0	0	1	0	0	1	0	0	0	3
AP2/ERF	TraesCS5A02G112600.1	1	0	0	0	0	0	0	0	0	0	0	0	0	0	0	0	0	0	0
AP2/ERF	TraesCS6D02G324200.1	0	0	0	0	0	0	0	0	0	0	0	0	0	0	0	0	0	0	0
ARF	TraesCS6D02G127600.2	0	0	0	0	0	1	0	0	0	0	0	0	0	0	0	0	0	0	1
ARF	TraesCS6A02G138600.4	0	0	0	0	0	1	0	0	0	0	0	0	0	0	0	0	0	0	1
ARF	TraesCS7D02G250100.2	0	0	0	0	0	0	0	0	0	0	0	0	0	0	0	0	0	0	0
ARF	TraesCS5A02G038300.1	0	0	0	0	0	1	0	0	0	0	0	0	0	0	0	0	0	0	1
ARF	TraesCS5D02G045700.1	0	0	0	0	0	1	0	0	0	0	0	0	0	0	0	0	0	0	1
ARF	TraesCS3D02G434700.1	0	1	1	0	0	1	1	0	1	0	0	0	0	0	0	0	1	0	6
ARF	TraesCS3B02G475800.1	0	1	1	0	0	1	1	0	1	0	0	0	0	0	0	0	1	0	6
ARF	TraesCS3A02G442000.1	0	1	1	0	0	1	1	0	1	0	0	0	0	0	0	0	1	0	6
ARF	TraesCS6A02G222300.1	0	0	0	0	0	1	1	0	1	0	0	0	0	0	0	0	0	1	4
ARF	TraesCS3D02G442000.5	0	1	1	0	0	1	1	0	1	0	0	0	0	0	0	0	1	0	6
ARF	TraesCS3A02G449300.2	0	1	1	0	0	1	1	0	1	0	0	0	0	0	0	0	1	0	6
ARF	TraesCS3D02G442000.1	0	0	0	0	0	0	0	0	0	0	0	0	0	0	0	0	0	0	0
ARF	TraesCS3B02G486000.1	0	1	1	0	0	1	1	0	1	0	0	0	0	0	0	0	1	0	6
ARF	TraesCS1D02G337400.1	0	0	0	0	0	1	0	0	1	0	0	0	0	0	0	0	0	0	2
ARF	TraesCS7D02G463000.1	0	0	0	0	0	0	0	0	0	0	0	0	0	0	0	0	0	0	0
B3	TraesCS5D02G496300.3	0	0	0	0	0	1	0	0	0	0	0	0	0	0	0	0	0	0	1
B3	TraesCS5B02G365800.1	0	0	0	0	0	1	0	0	0	0	0	0	0	0	0	0	0	0	1
B3	TraesCS5B02G514600.1	0	0	0	0	0	0	0	0	0	0	0	0	0	0	0	0	0	0	0
B3	TraesCS2D02G211600.1	0	0	0	0	0	0	0	0	0	0	0	0	0	0	0	0	0	0	0
B3	TraesCS2A02G204300.2	0	0	0	0	0	0	0	0	0	0	0	0	0	0	0	0	0	0	0
B3	TraesCS3B02G184200.2	0	0	0	0	0	0	0	0	0	0	0	0	0	0	0	0	0	0	0
B3	TraesCS1D02G078100.3	0	0	0	0	0	0	0	0	0	0	0	0	0	0	0	0	0	0	0
B3	TraesCS1D02G078100.5	0	0	0	0	0	0	0	0	0	0	0	0	0	0	0	0	0	0	0
B3	TraesCS5D02G515200.1	0	0	0	0	0	0	0	0	0	0	0	0	0	0	0	0	0	0	0
B3	TraesCS7D02G181300.1	0	0	0	0	0	0	0	0	0	0	0	0	0	0	0	0	0	0	0
B3	TraesCS7B02G085000.1	1	0	0	0	0	0	0	0	0	0	0	0	0	0	0	0	0	0	0
B3	TraesCS6A02G176600.1	0	0	0	0	0	0	0	0	0	0	0	0	0	0	0	0	0	0	0
B3	TraesCS3B02G278000.2	0	0	0	0	0	0	0	0	0	0	0	0	0	0	0	0	0	0	0
B3	TraesCS3A02G249100.2	0	0	0	0	0	0	0	0	0	0	0	0	0	0	0	0	0	0	0
B3	TraesCS5D02G515000.1	0	0	0	0	0	0	0	0	0	0	0	0	0	0	0	0	0	0	0
B3	TraesCS5A02G482700.2	0	0	0	0	0	1	0	0	0	0	0	0	0	0	0	0	0	0	1
B3	TraesCS7D02G326300.2	0	0	0	0	0	0	0	0	0	0	0	0	0	0	0	0	0	0	0
B3	TraesCS2B02G487800.1	0	0	0	0	0	0	0	0	0	0	0	0	0	0	0	0	0	0	0
B3	TraesCS5A02G298100.2	0	0	0	0	0	0	0	0	0	0	0	0	0	0	0	0	0	0	0
B3	TraesCS2D02G167000.2	1	0	0	0	0	0	0	0	0	0	0	0	0	0	0	0	0	0	0
B3	TraesCS5B02G514700.1	1	0	0	0	0	0	0	0	0	0	0	0	0	0	0	0	0	0	0
BBR-BPC	TraesCS4A02G423500.1	0	0	0	0	0	0	0	0	0	0	0	0	0	0	0	0	0	0	0
BBR-BPC	TraesCS7D02G061300.1	0	0	0	0	0	0	0	0	0	0	0	0	0	0	0	0	0	0	0
BBR-BPC	TraesCS7A02G066900.1	0	0	0	0	0	0	0	0	0	0	0	0	0	0	0	0	0	0	0
BES1	TraesCS3B02G156600.1	0	0	0	0	0	0	0	0	0	0	0	0	0	0	0	0	0	0	0
BES1	TraesCS3D02G139300.1	0	0	0	0	0	0	0	0	0	0	0	0	0	0	0	0	0	0	0
BES1	TraesCS2D02G199900.1	1	1	1	0	0	1	1	0	1	0	0	0	0	0	0	0	1	0	6
BES1	TraesCS2A02G187800.1	1	1	1	0	0	1	1	0	1	0	0	0	0	0	0	0	1	0	6
BES1	TraesCS2B02G219300.1	1	1	1	0	0	1	1	0	1	0	0	0	0	0	0	0	1	0	6
BES1	TraesCSU02G078100.3	0	0	0	0	0	0	0	0	0	0	0	0	0	0	0	0	0	0	0
bHLH	TraesCS5A02G251390.1	0	0	0	0	0	0	0	0	0	0	0	0	0	0	0	0	0	0	0
bHLH	TraesCS1B02G100400.2	0	0	0	0	0	0	0	0	0	0	0	0	0	0	0	0	0	0	0
bHLH	TraesCS1A02G083000.1	0	0	0	0	0	0	0	0	0	0	0	0	0	0	0	0	0	0	0
bHLH	TraesCS1D02G084200.1	0	0	0	0	0	0	0	0	0	0	0	0	0	0	0	0	0	0	0
bHLH	TraesCS5A02G515800.1	0	0	0	0	0	0	0	0	0	0	0	0	0	0	0	0	0	0	0
bHLH	TraesCS4B02G347100.1	0	0	0	0	0	0	0	0	0	0	0	0	0	0	0	0	0	0	0
bHLH	TraesCS4D02G342000.1	1	0	0	0	0	0	0	0	0	0	0	0	0	0	0	0	0	0	0
bHLH	TraesCS2B02G469800.1	0	0	0	0	0	0	0	0	0	0	0	0	0	0	0	0	0	0	0
bHLH	TraesCS2D02G448000.1	0	0	0	0	0	0	0	0	0	0	0	0	0	0	0	0	0	0	0
bHLH	TraesCS5D02G252300.1	0	0	0	0	0	0	0	0	0	0	0	0	0	0	0	0	0	0	0
bHLH	TraesCS6B02G346100.1	0	0	0	0	0	0	0	0	0	0	0	0	0	0	0	0	0	0	0
bHLH	TraesCS6D02G294900.1	0	0	0	0	0	0	0	0	0	0	0	0	0	0	0	0	0	0	0
bHLH	TraesCS2A02G448800.1	0	0	0	0	0	0	0	0	0	0	0	0	0	0	0	0	0	0	0
bHLH	TraesCS3B02G185400.1	0	0	0	0	0	0	0	0	0	0	0	0	0	0	0	0	0	0	0
bHLH	TraesCS6A02G264200.1	0	0	0	0	0	0	0	0	0	0	0	0	0	0	0	0	0	0	0
bHLH	TraesCS6B02G291200.1	0	0	0	0	0	0	0	0	0	0	0	0	0	0	0	0	0	0	0
bHLH	TraesCS3D02G166300.2	0	0	0	0	0	0	0	0	0	0	0	0	0	0	0	0	0	0	0
bHLH	TraesCS6D02G250700.1	1	0	0	0	0	0	0	0	0	0	0	0	0	0	0	0	0	0	0
bHLH	TraesCS1A02G193200.1	0	0	0	0	0	0	0	0	0	0	0	0	0	0	0	0	0	0	0
bHLH	TraesCS6B02G391100.1	0	0	0	0	0	0	0	0	0	0	0	0	0	0	0	0	0	0	0
bHLH	TraesCS6D02G341200.1	0	0	0	0	0	0	0	0	0	0	0	0	0	0	0	0	0	0	0
bHLH	TraesCS6B02G366200.1	0	0	0	0	0	0	0	0	0	0	0	0	0	0	0	0	0	0	0
bHLH	TraesCS6A02G358400.2	0	0	0	0	0	0	0	0	0	0	0	0	0	0	0	0	0	0	0
bHLH	TraesCS7A02G147500.1	0	0	0	0	0	0	0	0	0	0	0	0	0	0	0	0	0	0	0
bHLH	TraesCS7D02G149400.1	0	0	0	0	0	0	0	0	0	0	0	0	0	0	0	0	0	0	0
bHLH	TraesCS3B02G476000.1	1	0	0	1	1	1	1	0	1	0	0	0	0	0	0	0	0	0	5
bHLH	TraesCS3D02G434900.1	1	0	0	1	1	1	1	0	1	0	0	0	0	0	0	0	0	0	5
bHLH	TraesCS3A02G442200.1	0	0	0	1	1	1	1	0	1	0	0	0	0	0	0	0	0	0	5
bHLH	TraesCS7A02G311800.1	0	0	0	1	1	1	1	0	1	0	0	0	0	0	0	0	0	0	5
bHLH	TraesCS7A02G543300.1	1	0	0	0	0	0	0	0	0	0	0	0	0	0	0	0	0	0	0
bHLH	TraesCS7D02G529200.1	0	0	0	0	0	0	0	0	0	0	0	0	0	0	0	0	0	0	0
bHLH	TraesCSU02G075200.1	0	0	0	0	0	0	0	0	0	0	0	0	0	0	0	0	0	0	0
bHLH	TraesCS7B02G465400.1	0	0	0	0	0	0	0	0	0	0	0	0	0	0	0	0	0	0	0
bHLH	TraesCS5A02G250600.1	0	1	1	1	1	1	1	0	1	0	1	0	0	0	0	0	1	1	10
bHLH	TraesCS5D02G300100.1	0	0	0	0	0	0	0	0	0	0	0	0	0	0	0	0	0	0	0
bHLH	TraesCS5B02G457600.1	0	0	0	0	0	1	1	0	1	0	1	0	0	0	0	0	0	1	5
bHLH	TraesCS3A02G421400.1	0	0	0	1	1	1	1	0	1	0	0	0	0	0	0	0	0	1	6
bHLH	TraesCS7B02G303300.1	0	1	1	1	1	1	1	0	1	0	1	0	0	0	0	0	1	1	10
bHLH	TraesCS1B02G097000.1	0	0	0	0	0	0	0	0	0	0	0	0	0	0	0	0	0	0	0
bHLH	TraesCS7A02G256200.2	0	0	0	1	1	1	1	0	1	0	0	0	0	0	0	0	0	1	6
bHLH	TraesCS7D02G257000.1	0	0	0	1	1	1	1	0	1	0	0	0	0	0	0	0	0	1	6
bHLH	TraesCS7D02G257000.2	1	0	0	0	0	0	0	0	0	0	0	0	0	0	0	0	0	0	0
bHLH	TraesCS7B02G152800.1	0	0	0	1	1	1	1	0	1	0	0	0	0	0	0	0	0	1	6
bHLH	TraesCS7A02G256200.1	0	0	0	0	0	0	0	0	0	0	0	0	0	0	0	0	0	0	0
bHLH	TraesCS6A02G306200.1	0	0	0	0	0	0	0	0	0	0	0	0	0	0	0	0	0	0	0
bHLH	TraesCS6B02G334600.1	0	0	0	0	0	0	0	0	0	0	0	0	0	0	0	0	0	0	0
bHLH	TraesCS6D02G285300.1	0	0	0	0	0	0	0	0	0	0	0	0	0	0	0	0	0	0	0
bHLH	TraesCS2D02G523300.1	0	0	0	0	0	0	0	0	0	0	0	0	0	0	0	0	0	0	0
bHLH	TraesCS1D02G081000.1	0	0	0	0	0	0	0	0	0	0	0	0	0	0	0	0	0	0	0
bHLH	TraesCS3D02G008900.1	0	0	0	0	0	0	0	0	0	0	0	0	0	0	0	0	0	0	0
bHLH	TraesCS3D02G009200.1	0	0	0	0	0	0	0	0	0	0	0	0	0	0	0	0	0	0	0
bHLH	TraesCS1A02G079300.1	0	0	0	0	0	0	0	0	0	0	0	0	0	0	0	0	0	0	0
bHLH	TraesCS6D02G038400.2	1	0	0	0	0	0	0	0	0	0	0	0	0	0	0	0	0	0	0
bHLH	TraesCS5B02G402200.1	1	0	0	0	0	0	0	0	0	0	0	0	0	0	0	0	0	0	0
bHLH	TraesCS5D02G406900.1	0	0	0	0	0	0	0	0	0	0	0	0	0	0	0	0	0	0	0
bHLH	TraesCS6D02G038400.1	0	0	0	0	0	0	0	0	0	0	0	0	0	0	0	0	0	0	0
bZIP	TraesCS5B02G470600.1	0	0	0	0	0	0	0	0	0	0	0	0	0	0	0	0	0	0	0
bZIP	TraesCS5D02G473000.1	0	0	0	0	0	0	0	0	0	0	0	0	0	0	0	0	0	0	0
bZIP	TraesCS2A02G245700.2	0	0	0	0	0	0	0	0	0	0	0	0	0	0	0	0	0	0	0
bZIP	TraesCS2D02G236200.4	0	0	0	0	0	0	0	0	0	0	0	0	0	0	0	0	0	0	0
bZIP	TraesCS2D02G236200.3	0	0	0	0	0	0	0	0	0	0	0	0	0	0	0	0	0	0	0
bZIP	TraesCSU02G019200.3	0	0	0	0	0	0	0	0	0	0	0	0	0	0	0	0	0	0	0
bZIP	TraesCS6B02G110100.3	0	0	0	0	0	0	0	0	0	0	0	0	0	0	0	0	0	0	0
bZIP	TraesCS6A02G087400.4	0	0	0	0	0	0	0	0	0	0	0	0	0	0	0	0	0	0	0
bZIP	TraesCS6B02G110100.2	0	0	0	0	0	0	0	0	0	0	0	0	0	0	0	0	0	0	0
bZIP	TraesCS1A02G306300.1	0	0	0	0	0	0	0	0	0	0	0	0	0	0	0	0	0	0	0
bZIP	TraesCS1B02G317100.1	0	0	0	0	0	0	0	0	0	0	0	0	0	0	0	0	0	0	0
bZIP	TraesCS7D02G349300.1	0	0	0	0	0	1	0	0	0	0	0	0	0	0	0	0	0	0	1
bZIP	TraesCS7B02G075600.1	0	0	0	0	0	0	0	0	0	0	0	0	0	0	0	0	0	0	0
bZIP	TraesCS7A02G170600.1	0	0	0	0	0	0	0	0	0	0	0	0	0	0	0	0	0	0	0
bZIP	TraesCS2A02G099400.1	0	0	0	0	0	0	0	0	0	0	0	0	0	0	0	0	0	0	0
bZIP	TraesCS7D02G171300.1	0	0	0	0	0	0	0	0	0	0	0	0	0	0	0	0	0	0	0
bZIP	TraesCS3D02G330300.1	0	0	0	0	0	0	0	0	0	0	0	0	0	0	0	0	0	0	0
bZIP	TraesCS3A02G337200.1	0	0	0	0	0	0	0	0	0	0	0	0	0	0	0	0	0	0	0
bZIP	TraesCS6A02G175800.1	0	0	0	0	0	1	0	0	0	0	0	0	0	0	0	0	0	0	1
bZIP	TraesCS6B02G209600.1	0	0	0	0	0	1	0	0	0	0	0	0	0	0	0	0	0	0	1
bZIP	TraesCS6A02G333600.2	0	0	0	0	0	0	0	0	0	0	0	0	0	0	0	0	0	0	0
bZIP	TraesCS6B02G364000.1	1	0	0	0	0	0	0	0	0	0	0	0	0	0	0	0	0	0	0
bZIP	TraesCS6D02G312800.1	0	0	0	0	0	0	0	0	0	0	0	0	0	0	0	0	0	0	0
bZIP	TraesCS5A02G237200.2	0	0	0	0	0	0	0	0	0	0	0	0	0	0	0	0	0	0	0
bZIP	TraesCS1D02G273100.1	0	0	0	0	0	0	0	0	0	0	0	0	0	0	0	0	0	0	0
bZIP	TraesCS3D02G129800.1	1	0	0	0	0	0	0	0	0	0	0	0	0	0	0	0	0	0	0
bZIP	TraesCS3A02G128900.1	1	0	0	0	0	0	0	0	0	0	0	0	0	0	0	0	0	0	0
bZIP	TraesCS5A02G440400.1	0	0	0	0	0	0	0	0	0	0	0	0	0	0	0	0	0	0	0
bZIP	TraesCS5B02G444100.2	0	0	0	0	0	0	0	0	0	0	0	0	0	0	0	0	0	0	0
bZIP	TraesCS5D02G447500.1	0	0	0	0	0	0	0	0	0	0	0	0	0	0	0	0	0	0	0
bZIP	TraesCS3D02G129800.2	0	0	0	0	0	0	0	0	0	0	0	0	0	0	0	0	0	0	0
bZIP	TraesCS5D02G308600.1	0	0	0	0	0	0	0	0	0	0	0	0	0	0	0	0	0	0	0
bZIP	TraesCS5B02G301900.1	0	0	0	0	0	0	0	0	0	0	0	0	0	0	0	0	0	0	0
bZIP	TraesCS3D02G148200.1	0	0	0	0	0	0	0	0	0	0	0	0	0	0	0	0	0	0	0
bZIP	TraesCS3A02G131900.2	0	0	0	0	0	0	0	0	0	0	0	0	0	0	0	0	0	0	0
bZIP	TraesCS5B02G124200.1	0	0	0	0	0	0	0	0	0	0	0	0	0	0	0	0	0	0	0
bZIP	TraesCS4B02G169600.1	0	0	0	0	0	0	0	0	0	0	0	0	0	0	0	0	0	0	0
bZIP	TraesCS5D02G132300.1	0	0	0	0	0	0	0	0	0	0	0	0	0	0	0	0	0	0	0
bZIP	TraesCS2B02G556600.1	0	0	0	0	0	0	0	0	0	0	0	0	0	0	0	0	0	0	0
bZIP	TraesCS1A02G186000.1	0	0	0	0	0	0	0	0	0	0	0	0	0	0	0	0	0	0	0
bZIP	TraesCS7D02G269300.1	0	0	0	0	0	0	0	0	0	0	0	0	0	0	0	0	0	0	0
C2H2	TraesCS4A02G416800.1	0	0	0	0	0	0	0	0	0	0	0	0	0	0	0	0	0	0	0
C2H2	TraesCS3B02G237700.1	0	0	0	0	0	0	0	0	0	0	0	0	0	0	0	0	0	0	0
C2H2	TraesCS3D02G209800.1	0	0	0	0	0	0	0	0	0	0	0	0	0	0	0	0	0	0	0
C2H2	TraesCS3A02G205800.1	0	0	0	0	0	0	0	0	0	0	0	0	0	0	0	0	0	0	0
C2H2	TraesCS4A02G415000.1	0	0	0	0	0	0	0	0	0	0	0	0	0	0	0	0	0	0	0
C2H2	TraesCS3A02G412700.1	0	0	0	0	0	0	0	0	0	0	0	0	0	0	0	0	0	0	0
C2H2	TraesCS5A02G179800.1	0	0	0	0	0	0	0	0	0	0	0	0	0	0	0	0	0	0	0
C2H2	TraesCS7A02G404400.1	0	0	1	0	0	1	0	0	1	0	0	0	0	0	0	0	0	0	3
C2H2	TraesCS7D02G397800.1	0	0	1	0	0	1	0	0	1	0	0	0	0	0	0	0	0	0	3
C2H2	TraesCS4B02G230800.1	0	0	0	0	0	1	1	0	0	0	1	0	0	0	0	0	0	0	3
C2H2	TraesCS4D02G232000.1	0	0	0	0	0	1	1	0	0	0	1	0	0	0	0	0	0	0	3
C2H2	TraesCS4A02G074700.1	1	0	0	0	0	1	1	0	0	0	1	0	0	0	0	0	0	0	3
C2H2	TraesCS5D02G124200.1	1	0	0	0	0	0	0	0	0	0	0	0	0	0	0	0	0	0	0
C2H2	TraesCS3A02G105100.1	0	0	0	0	0	1	1	0	0	0	1	0	0	0	0	0	0	0	3
C2H2	TraesCS5B02G232200.1	1	0	0	0	0	1	1	0	0	0	1	0	0	0	0	0	0	0	3
C2H2	TraesCS5D02G240600.1	0	0	0	0	0	1	1	0	0	0	1	0	0	0	0	0	0	0	3
C2H2	TraesCS5A02G233700.1	1	0	0	0	0	1	1	0	0	0	1	0	0	0	0	0	0	0	3
C2H2	TraesCS2B02G627700.1	0	0	0	0	0	0	0	0	0	0	0	0	0	0	0	0	0	0	0
C2H2	TraesCSU02G012300.1	0	0	0	0	0	0	0	0	0	0	0	0	0	0	0	0	0	0	0
C2H2	TraesCS2D02G004200.1	1	0	0	0	0	0	0	0	0	0	0	0	0	0	0	0	0	0	0
C2H2	TraesCS6D02G116300.1	0	0	0	0	0	1	1	0	0	0	1	0	0	0	0	0	0	0	3
C2H2	TraesCS4D02G003500.1	0	0	0	0	0	0	0	0	0	0	0	0	0	0	0	0	0	0	0
C3H	TraesCS3A02G178700.1	0	0	0	0	0	1	0	0	0	0	0	0	0	0	0	0	0	0	1
C3H	TraesCS1B02G480400.2	0	0	0	0	0	0	0	0	0	0	0	0	0	0	0	0	0	0	0
C3H	TraesCS1B02G480400.1	1	0	0	0	0	0	0	0	0	0	0	0	0	0	0	0	0	0	0
C3H	TraesCS1A02G445600.1	0	0	0	0	0	0	0	0	0	0	0	0	0	0	0	0	0	0	0
C3H	TraesCS3A02G179200.1	0	0	0	0	0	1	0	0	0	0	0	0	0	0	0	0	0	0	1
C3H	TraesCS3B02G205900.1	0	0	0	0	0	1	0	0	0	0	0	0	0	0	0	0	0	0	1
C3H	TraesCS3D02G181900.1	0	0	0	0	0	1	0	0	0	0	0	0	0	0	0	0	0	0	1
C3H	TraesCS3D02G418400.1	0	0	0	0	0	0	0	0	0	0	0	0	0	0	0	0	0	0	0
C3H	TraesCS5A02G121100.1	0	0	0	0	0	1	0	0	0	0	0	0	0	0	0	0	0	0	1
C3H	TraesCS1D02G421800.1	0	0	0	0	0	0	0	0	0	0	0	0	0	0	0	0	0	0	0
C3H	TraesCS6D02G155400.1	1	0	0	0	0	0	0	0	0	0	0	0	0	0	0	0	0	0	0
C3H	TraesCS3B02G237800.1	0	0	0	0	0	0	0	0	0	0	0	0	0	0	0	0	0	0	0
C3H	TraesCS6B02G372100.1	0	0	0	0	0	1	0	0	0	0	0	0	0	0	0	0	0	0	1
C3H	TraesCS4A02G082400.1	0	0	0	0	0	0	0	0	0	0	0	0	0	0	0	0	0	0	0
C3H	TraesCS7D02G408300.1	0	0	0	0	0	0	0	0	0	0	0	0	0	0	0	0	0	0	0
C3H	TraesCS1A02G114400.1	0	0	0	0	0	0	0	0	0	0	0	0	0	0	0	0	0	0	0
C3H	TraesCS3B02G147400.1	0	0	0	0	0	0	0	0	0	0	0	0	0	0	0	0	0	0	0
C3H	TraesCS3B02G201900.1	0	0	0	0	0	0	0	0	0	0	0	0	0	0	0	0	0	0	0
C3H	TraesCS3D02G129200.1	0	0	0	0	0	0	0	0	0	0	0	0	0	0	0	0	0	0	0
C3H	TraesCS2A02G547900.1	0	0	0	0	0	0	0	0	0	0	0	0	0	0	0	0	0	0	0
C3H	TraesCS2D02G549000.1	0	0	0	0	0	0	0	0	0	0	0	0	0	0	0	0	0	0	0
C3H	TraesCS2B02G578700.1	0	0	0	0	0	0	0	0	0	0	0	0	0	0	0	0	0	0	0
C3H	TraesCS7D02G450100.1	0	0	0	0	0	0	0	0	0	0	0	0	0	0	0	0	0	0	0
C3H	TraesCS7A02G461800.1	0	0	0	0	0	0	0	0	0	0	0	0	0	0	0	0	0	0	0
C3H	TraesCS7A02G452300.1	0	0	0	0	0	0	0	0	0	0	0	0	0	0	0	0	0	0	0
C3H	TraesCS7B02G352100.1	0	0	0	0	0	0	0	0	0	0	0	0	0	0	0	0	0	0	0
C3H	TraesCS7D02G441200.1	0	0	0	0	0	0	0	0	0	0	0	0	0	0	0	0	0	0	0
C3H	TraesCS7B02G363200.2	0	0	0	0	0	0	0	0	0	0	0	0	0	0	0	0	0	0	0
C3H	TraesCS4D02G034300.1	0	0	0	0	0	0	0	0	0	0	0	0	0	0	0	0	0	0	0
C3H	TraesCS3B02G385900.2	0	0	0	0	0	0	0	0	0	0	0	0	0	0	0	0	0	0	0
C3H	TraesCS1A02G178100.1	0	0	0	0	0	0	0	0	0	0	0	0	0	0	0	0	0	0	0
C3H	TraesCS1D02G176600.2	0	0	0	0	0	0	0	0	0	0	0	0	0	0	0	0	0	0	0
C3H	TraesCS6A02G138900.1	0	0	0	0	0	0	0	0	0	0	0	0	0	0	0	0	0	0	0
C3H	TraesCS7B02G315000.1	0	0	0	0	0	0	0	0	0	0	0	0	0	0	0	0	0	0	0
CPP	TraesCS4A02G284600.3	0	0	0	0	0	1	1	0	0	0	1	0	1	0	0	0	0	0	4
CPP	TraesCS1B02G340500.1	0	0	0	0	0	0	0	0	0	0	0	0	0	0	0	0	0	0	0
CPP	TraesCS7B02G242300.1	0	0	0	0	0	0	0	0	0	0	0	0	0	0	0	0	0	0	0
CPP	TraesCS7A02G341100.2	0	0	0	0	0	0	0	0	0	0	0	0	0	0	0	0	0	0	0
CPP	TraesCS2A02G122300.2	0	0	0	0	0	0	0	0	0	0	0	0	0	0	0	0	0	0	0
CPP	TraesCS2D02G125000.1	0	0	0	0	0	0	0	0	0	0	0	0	0	0	0	0	0	0	0
CPP	TraesCS7B02G028200.2	0	0	0	0	0	1	0	0	0	0	0	0	0	0	0	0	0	0	1
CPP	TraesCS7D02G127100.2	0	0	0	0	0	1	0	0	0	0	0	0	0	0	0	0	0	0	1
CPP	TraesCS4A02G121300.4	0	0	0	0	0	1	0	0	0	0	0	0	0	0	0	0	0	0	1
DBD	TraesCS2A02G366100.2	0	0	0	0	0	0	0	0	0	0	0	0	0	0	0	0	0	0	0
DBD	TraesCS6D02G202000.1	0	0	0	0	0	1	0	0	0	0	0	0	0	0	0	0	0	0	1
DBD	TraesCS6A02G218900.1	0	0	0	0	0	1	0	0	0	0	0	0	0	0	0	0	0	0	1
DBD	TraesCS6B02G248400.1	0	0	0	0	0	1	0	0	0	0	0	0	0	0	0	0	0	0	1
DBD	TraesCS1A02G068200.1	1	0	0	0	0	0	0	0	0	0	0	0	0	0	0	0	0	0	0
DBD	TraesCS1B02G086700.1	1	0	0	0	0	0	0	0	0	0	0	0	0	0	0	0	0	0	0
DBD	TraesCS1D02G069600.1	1	0	0	0	0	0	0	0	0	0	0	0	0	0	0	0	0	0	0
DBD	TraesCS7D02G466400.1	0	0	0	0	0	0	0	0	0	0	0	0	0	0	0	0	0	0	0
DBD	TraesCS1A02G178100.1	0	0	0	0	0	0	0	0	0	0	0	0	0	0	0	0	0	0	0
DBD	TraesCS6A02G156600.1	0	0	0	0	0	0	0	0	0	0	0	0	0	0	0	0	0	0	0
E2F/DP	TraesCS6B02G341900.2	0	0	0	0	0	0	0	0	0	0	0	0	0	0	0	0	0	0	0
E2F/DP	TraesCS7A02G238500.2	0	0	0	0	0	0	0	0	0	0	0	0	0	0	0	0	0	0	0
E2F/DP	TraesCS5A02G125900.3	1	0	0	0	0	0	0	0	0	0	0	0	0	0	0	0	0	0	0
E2F/DP	TraesCS2B02G313600.2	0	0	0	0	0	0	0	0	0	0	0	0	0	0	0	0	0	0	0
E2F/DP	TraesCS2D02G295300.2	0	0	0	0	0	0	0	0	0	0	0	0	0	0	0	0	0	0	0
E2F/DP	TraesCS6D02G099400.3	0	0	0	0	0	0	0	0	0	0	0	0	0	0	0	0	0	0	0
EIL	TraesCS5A02G265700.1	0	0	0	0	0	0	0	0	0	0	0	0	0	0	0	0	0	0	0
FAR1	TraesCS2B02G217400.2	0	0	0	0	0	0	0	0	0	0	0	0	0	0	0	0	0	0	0
GARP	TraesCS5A02G068900.2	0	0	0	0	0	0	0	0	0	0	0	0	0	0	0	0	0	0	0
GARP	TraesCS3B02G124100.1	0	0	0	0	0	0	0	0	0	0	0	0	0	0	0	0	0	0	0
GARP	TraesCS6B02G012800.1	0	0	0	0	0	0	0	0	0	0	0	0	0	0	0	0	0	0	0
GARP	TraesCS7B02G200700.1	0	0	0	0	0	0	0	0	0	0	0	0	0	0	0	0	0	0	0
GARP	TraesCS6A02G266400.2	0	1	1	0	0	1	1	0	1	0	0	0	0	0	0	0	1	0	6
GARP	TraesCS6D02G248300.2	0	1	1	0	0	1	1	0	1	0	0	0	0	0	0	0	1	0	6
GARP	TraesCS6D02G248300.1	0	0	0	0	0	0	0	0	0	0	0	0	0	0	0	0	0	0	0
GARP	TraesCS5A02G402800.1	0	1	1	0	0	1	1	0	1	0	0	0	0	0	0	0	1	0	6
GARP	TraesCS7A02G304600.3	0	0	0	0	0	0	0	0	0	0	0	0	0	0	0	0	0	0	0
GeBP	TraesCS3B02G200500.1	0	0	0	0	0	0	0	0	0	0	0	0	0	0	0	0	0	0	0
GRAS	TraesCS5B02G326400.2	0	0	0	0	0	0	0	0	0	0	0	0	0	0	0	0	0	0	0
GRAS	TraesCS5B02G326100.1	0	0	0	0	0	0	0	0	0	0	0	0	0	0	0	0	0	0	0
GRAS	TraesCS5D02G148000.1	0	0	0	0	0	0	0	0	0	0	0	0	0	0	0	0	0	0	0
GRAS	TraesCS5A02G139000.1	0	0	0	0	0	0	0	0	0	0	0	0	0	0	0	0	0	0	0
GRAS	TraesCS4B02G141400.1	0	0	0	0	0	0	0	0	0	0	0	0	0	0	0	0	0	0	0
GRAS	TraesCS4D02G136500.1	0	0	0	0	0	0	0	0	0	0	0	0	0	0	0	0	0	0	0
GRF	TraesCS6D02G238900.1	0	0	0	0	0	0	0	0	0	0	0	0	0	0	0	0	0	0	0
GRF	TraesCS6B02G267500.1	0	0	0	0	0	0	0	0	0	0	0	0	0	0	0	0	0	0	0
GRF	TraesCS6A02G257600.1	0	0	0	0	0	0	0	0	0	0	0	0	0	0	0	0	0	0	0
GRF	TraesCS7A02G049100.1	0	0	0	0	0	0	0	0	0	0	0	0	0	0	0	0	0	0	0
GRF	TraesCS4A02G434900.1	0	0	0	0	0	0	0	0	0	0	0	0	0	0	0	0	0	0	0
GRF	TraesCS2A02G398300.2	0	0	0	0	0	0	0	0	0	0	0	0	0	0	0	0	0	0	0
GRF	TraesCS7B02G070200.1	0	0	0	0	0	1	1	0	0	0	1	0	1	0	0	0	0	0	4
GRF	TraesCS7D02G166400.1	0	0	0	0	0	1	1	0	0	0	1	0	1	0	0	0	0	0	4
GRF	TraesCS2B02G416300.1	0	0	0	0	0	0	0	0	0	0	0	0	0	0	0	0	0	0	0
GRF	TraesCS2D02G395900.1	0	0	0	0	0	0	0	0	0	0	0	0	0	0	0	0	0	0	0
HB	TraesCS6A02G255800.1	0	0	0	0	0	1	1	0	0	0	0	0	0	0	0	0	0	0	2
HB	TraesCS5B02G315100.1	0	0	0	0	0	0	0	0	0	0	0	0	0	0	0	0	0	0	0
HB	TraesCS5B02G315100.2	0	0	0	0	0	0	0	0	0	0	0	0	0	0	0	0	0	0	0
HB	TraesCS5D02G320600.1	0	0	0	0	0	0	0	0	0	0	0	0	0	0	0	0	0	0	0
HB	TraesCS5A02G314400.2	0	0	0	0	0	0	0	0	0	0	0	0	0	0	0	0	0	0	0
HB	TraesCS7B02G072700.1	0	0	0	0	0	1	1	0	1	0	1	0	1	0	0	0	0	1	6
HB	TraesCS7A02G167900.1	0	0	0	0	0	1	1	0	1	0	1	0	1	0	0	0	0	1	6
HB	TraesCS7D02G168700.1	0	0	0	0	0	1	1	0	1	0	1	0	1	0	0	0	0	1	6
HB	TraesCS1A02G338900.2	0	0	0	0	0	0	0	0	0	0	0	0	0	0	0	0	0	0	0
HB	TraesCS1A02G193400.1	0	0	0	0	0	1	1	0	0	0	0	0	0	0	0	0	0	0	2
HB	TraesCS1D02G197300.1	0	0	0	0	0	1	1	0	0	0	0	0	0	0	0	0	0	0	2
HB	TraesCS1B02G208400.1	0	0	0	0	0	1	1	0	0	0	0	0	0	0	0	0	0	0	2
HB	TraesCS6B02G354900.1	1	0	0	0	0	1	1	0	1	0	1	0	1	0	0	0	0	1	6
HB	TraesCS6B02G354900.2	1	0	0	0	0	0	0	0	0	0	0	0	0	0	0	0	0	0	0
HB	TraesCS2B02G497500.1	1	1	1	0	0	1	1	0	1	0	0	0	0	0	0	0	1	0	6
HB	TraesCS2A02G474000.1	0	1	1	0	0	1	1	0	1	0	0	0	0	0	0	0	1	0	6
HB	TraesCS2D02G473700.1	1	1	1	0	0	1	1	0	1	0	0	0	0	0	0	0	1	0	6
HB	TraesCS6A02G324500.1	1	0	0	0	0	1	1	0	1	0	1	0	1	0	0	0	0	1	6
HB	TraesCS6D02G304300.1	1	0	0	0	0	1	1	0	1	0	1	0	1	0	0	0	0	1	6
HB	TraesCS1A02G052000.1	0	0	0	0	0	1	0	0	0	0	0	0	0	0	0	0	0	0	1
HB	TraesCS6B02G321100.1	0	0	0	0	0	0	0	0	0	0	0	0	0	0	0	0	0	0	0
HB	TraesCS7D02G305200.2	1	1	1	0	0	1	1	0	1	0	0	0	0	0	0	0	1	0	6
HB	TraesCS7A02G308400.1	1	1	1	0	0	1	1	0	1	0	0	0	0	0	0	0	1	0	6
HB	TraesCS7B02G208600.1	0	1	1	0	0	1	1	0	1	0	0	0	0	0	0	0	1	0	6
HB	TraesCS4A02G405800.1	0	0	0	0	0	0	0	0	0	0	0	0	0	0	0	0	0	0	0
HB	TraesCS7A02G083800.1	0	0	1	0	0	1	0	0	1	0	0	0	0	0	0	0	0	0	3
HB	TraesCS5B02G246700.1	0	0	0	0	0	0	0	0	0	0	0	0	0	0	0	0	0	0	0
HB	TraesCS5A02G249000.1	0	0	0	0	0	0	0	0	0	0	0	0	0	0	0	0	0	0	0
HB	TraesCS5D02G256200.1	0	0	0	0	0	0	0	0	0	0	0	0	0	0	0	0	0	0	0
HB	TraesCS2A02G188500.1	0	0	0	0	0	0	0	0	0	0	0	0	0	0	0	0	0	0	0
HB	TraesCS5D02G235300.1	0	0	0	0	0	1	0	0	0	0	0	0	0	0	0	0	0	0	1
HB	TraesCS5A02G232700.1	0	0	0	0	0	1	0	0	0	0	0	0	0	0	0	0	0	0	1
HB	TraesCS4D02G286400.1	1	1	1	0	0	1	1	0	1	1	1	0	1	0	0	0	0	0	8
HB	TraesCS5B02G231300.1	0	0	0	0	0	1	0	0	0	0	0	0	0	0	0	0	0	0	1
HB	TraesCS4B02G287600.1	0	1	1	0	0	1	1	0	1	1	1	0	1	0	0	0	0	0	8
HB	TraesCS4A02G016600.1	1	1	1	0	0	1	1	0	1	1	1	0	1	0	0	0	0	0	8
HB	TraesCS4D02G286400.2	1	0	0	0	0	0	0	0	0	0	0	0	0	0	0	0	0	0	0
HB	TraesCS3B02G273900.1	0	0	0	0	0	1	0	0	0	0	0	0	0	0	0	0	0	0	1
HB	TraesCS3D02G245800.2	0	0	0	0	0	1	0	0	0	0	0	0	0	0	0	0	0	0	1
HB	TraesCS3A02G245700.2	0	0	0	0	0	1	0	0	0	0	0	0	0	0	0	0	0	0	1
HB	TraesCS4B02G084700.7	0	0	0	0	0	0	0	0	0	0	0	0	0	0	0	0	0	0	0
HB	TraesCS4B02G084700.11	0	0	0	0	0	0	0	0	0	0	0	0	0	0	0	0	0	0	0
HB	TraesCS4B02G084700.9	1	0	0	0	0	0	0	0	0	0	0	0	0	0	0	0	0	0	0
HB	TraesCS3D02G244300.1	0	0	0	0	0	0	0	0	0	0	0	0	0	0	0	0	0	0	0
HB	TraesCS3A02G247200.1	0	0	0	0	0	0	0	0	0	0	0	0	0	0	0	0	0	0	0
HB	TraesCS3B02G272200.1	0	0	0	0	0	0	0	0	0	0	0	0	0	0	0	0	0	0	0
HB	TraesCS2D02G127700.1	0	0	0	0	0	0	0	0	0	0	0	0	0	0	0	0	0	0	0
HB	TraesCS2B02G147300.4	0	0	0	0	0	0	0	0	0	0	0	0	0	0	0	0	0	0	0
HB	TraesCS3B02G131700.6	0	0	0	0	0	0	0	0	0	0	0	0	0	0	0	0	0	0	0
HB	TraesCS3A02G112300.2	0	0	0	0	0	0	0	0	0	0	0	0	0	0	0	0	0	0	0
HB	TraesCS3D02G357400.1	0	1	1	0	0	1	1	0	1	0	0	0	0	0	0	1	1	0	7
HB	TraesCS3A02G363900.1	0	1	1	0	0	1	1	0	1	0	0	0	0	0	0	1	1	0	7
HB	TraesCS1B02G091700.1	0	1	1	0	0	1	1	0	1	1	1	0	1	0	0	0	0	0	8
HB	TraesCS7D02G364500.1	0	0	0	0	0	1	1	0	0	0	0	0	0	0	0	0	0	0	2
HB	TraesCS7B02G269400.1	0	0	0	0	0	1	1	0	0	0	0	0	0	0	0	0	0	0	2
HB	TraesCS7A02G358300.1	1	0	0	0	0	1	1	0	0	0	0	0	0	0	0	0	0	0	2
HB	TraesCS3D02G447300.1	0	0	0	0	0	1	0	0	0	0	0	0	0	0	0	0	0	0	1
HB	TraesCS3B02G493200.1	0	0	0	0	0	1	0	0	0	0	0	0	0	0	0	0	0	0	1
HB	TraesCS3A02G454600.1	0	0	0	0	0	1	0	0	0	0	0	0	0	0	0	0	0	0	1
HSF	TraesCS5A02G437900.1	0	0	0	0	0	0	0	0	0	0	0	0	0	0	0	0	0	0	0
HSF	TraesCS5B02G440700.1	0	0	0	0	0	0	0	0	0	0	0	0	0	0	0	0	0	0	0
HSF	TraesCS5D02G321000.1	0	0	0	0	0	0	0	0	0	0	0	0	0	0	0	0	0	0	0
HSF	TraesCS2D02G151200.1	0	0	0	0	0	0	0	0	0	0	0	0	0	0	0	0	0	0	0
HSF	TraesCS2B02G171900.1	0	0	0	0	0	0	0	0	0	0	0	0	0	0	0	0	0	0	0
HSF	TraesCS5A02G237600.1	0	0	0	0	0	0	0	0	0	0	0	0	0	0	0	0	0	0	0
HSF	TraesCS5D02G243900.1	0	0	0	0	0	0	0	0	0	0	0	0	0	0	0	0	0	0	0
HSF	TraesCS1A02G375600.1	0	0	0	0	0	0	0	0	0	0	0	0	0	0	0	0	0	0	0
HSF	TraesCS1B02G396000.1	0	0	0	0	0	0	0	0	0	0	0	0	0	0	0	0	0	0	0
HSF	TraesCS2A02G401600.1	0	0	0	0	0	0	0	0	0	0	0	0	0	0	0	0	0	0	0
HSF	TraesCS2B02G419600.1	0	0	0	0	0	0	0	0	0	0	0	0	0	0	0	0	0	0	0
HSF	TraesCS2D02G399000.1	0	0	0	0	0	0	0	0	0	0	0	0	0	0	0	0	0	0	0
HSF	TraesCS2B02G232000.2	0	0	0	0	0	0	0	0	0	0	0	0	0	0	0	0	0	0	0
HSF	TraesCS6A02G098800.1	0	0	0	0	0	0	0	0	0	0	0	0	0	0	0	0	0	0	0
HSF	TraesCS6D02G083800.1	0	0	0	0	0	0	0	0	0	0	0	0	0	0	0	0	0	0	0
LBD (AS2/LOB)	TraesCS4D02G014600.1	0	0	0	0	0	0	0	0	0	0	0	0	0	0	0	0	0	0	0
LBD (AS2/LOB)	TraesCS1B02G270400.1	0	0	0	0	0	1	1	0	1	0	0	0	0	0	0	0	0	1	4
LBD (AS2/LOB)	TraesCS3D02G397200.1	1	0	0	0	0	1	1	0	1	0	0	0	0	0	0	0	0	1	4
LBD (AS2/LOB)	TraesCS3A02G402300.1	0	0	0	0	0	1	1	0	1	0	0	0	0	0	0	0	0	1	4
LBD (AS2/LOB)	TraesCS3B02G435700.1	1	0	0	0	0	1	1	0	1	0	0	0	0	0	0	0	0	1	4
MIKC	TraesCS6B02G286400.2	0	1	1	0	0	1	1	0	1	1	1	1	1	1	0	0	1	0	11
MIKC	TraesCS6D02G240200.2	0	1	1	0	0	1	1	0	1	1	1	1	1	1	0	0	1	0	11
MIKC	TraesCS6A02G259000.3	0	1	1	0	0	1	1	0	1	1	1	1	1	1	0	0	1	0	11
MIKC	TraesCS6A02G259000.1	0	0	0	0	0	0	0	0	0	0	0	0	0	0	0	0	0	0	0
MIKC	TraesCS5A02G286800.1	0	1	1	1	1	1	1	0	1	1	1	0	1	1	0	1	1	1	14
MIKC	TraesCS5D02G294500.1	0	1	1	1	1	1	1	0	1	1	1	0	1	1	0	1	1	1	14
MIKC	TraesCS5B02G286100.2	0	1	1	1	1	1	1	0	1	1	1	0	1	1	0	1	1	1	14
MIKC	TraesCS3B02G157500.2	0	1	1	1	1	1	1	0	1	1	1	0	1	0	0	0	1	1	12
MIKC	TraesCS3B02G157500.1	0	0	0	0	0	0	0	0	0	0	0	0	0	0	0	0	0	0	0
MIKC	TraesCS1D02G127700.2	0	1	1	1	1	1	1	0	1	1	1	1	1	0	0	0	1	1	13
MIKC	TraesCS1B02G144800.3	0	1	1	1	1	1	1	0	1	1	1	1	1	0	0	0	1	1	13
MIKC	TraesCS6B02G186700.1	0	1	1	0	0	1	1	0	1	0	0	0	0	0	0	0	1	0	6
MIKC	TraesCS6A02G158100.1	0	1	1	0	0	1	1	0	1	0	0	0	0	0	0	0	1	0	6
MIKC	TraesCS6D02G147400.1	0	1	1	0	0	1	1	0	1	0	0	0	0	0	0	0	1	0	6
MIKC	TraesCS2A02G422400.1	0	1	1	0	0	1	1	0	1	0	0	0	0	0	0	0	1	0	6
M-type	TraesCS2D02G418800.1	0	1	1	0	0	1	1	0	1	0	0	0	0	0	0	0	1	0	6
M-type	TraesCS7A02G474900.1	0	0	0	0	0	0	0	0	0	0	0	0	0	0	0	0	0	0	0
M-type	TraesCS3D02G090300.1	0	0	0	0	0	0	0	0	0	0	0	0	0	0	0	0	0	0	0
M-type	TraesCS1D02G127700.1	0	0	0	0	0	0	0	0	0	0	0	0	0	0	0	0	0	0	0
M-type	TraesCS1A02G125800.1	0	1	1	1	1	1	1	0	1	1	1	1	1	0	0	0	1	1	13
M-type	TraesCS5B02G115100.1	0	1	1	1	1	1	1	0	1	0	0	0	0	0	0	0	1	0	8
M-type	TraesCS1D02G262700.1	0	1	1	1	1	1	1	0	1	0	0	0	0	0	0	0	1	1	9
M-type	TraesCS1B02G273300.1	0	1	1	1	1	1	1	0	1	0	0	0	0	0	0	0	1	1	9
M-type	TraesCS1A02G262700.1	0	1	1	1	1	1	1	0	1	0	0	0	0	0	0	0	1	1	9
MYB	TraesCS3A02G359200.1	0	0	0	0	0	0	0	0	0	0	0	0	0	0	0	0	0	0	0
MYB	TraesCS5A02G087100.1	0	0	0	0	0	0	0	0	0	0	0	0	0	0	0	0	0	0	0
MYB	TraesCS2A02G157600.1	0	0	0	0	0	0	0	0	0	0	0	0	0	0	0	0	0	0	0
MYB	TraesCS2D02G163700.1	0	0	0	0	0	0	0	0	0	0	0	0	0	0	0	0	0	0	0
MYB	TraesCS2B02G183100.1	0	0	0	0	0	0	0	0	0	0	0	0	0	0	0	0	0	0	0
MYB	TraesCS2D02G366400.1	0	0	0	0	0	0	0	0	0	0	0	0	0	0	0	0	0	0	0
MYB	TraesCS3B02G416400.1	0	0	0	0	0	0	0	0	0	0	0	0	0	0	0	0	0	0	0
MYB	TraesCS3A02G384400.1	0	0	0	0	0	0	0	0	0	0	0	0	0	0	0	0	0	0	0
MYB	TraesCS2A02G370000.1	0	0	0	0	0	0	0	0	0	0	0	0	0	0	0	0	0	0	0
MYB	TraesCS3D02G468400.1	0	0	0	0	0	0	0	0	0	0	0	0	0	0	0	0	0	0	0
MYB	TraesCS3D02G223700.1	0	0	0	1	1	1	1	0	1	0	0	0	0	0	0	0	0	0	5
MYB	TraesCS2B02G343800.1	0	1	1	0	0	1	1	0	1	1	1	0	1	0	0	0	0	0	8
MYB	TraesCS3A02G439500.1	0	0	0	0	0	0	0	0	0	0	0	0	0	0	0	0	0	0	0
MYB	TraesCS6A02G236700.1	0	0	0	0	0	0	0	0	0	0	0	0	0	0	0	0	0	0	0
MYB	TraesCS6D02G219300.1	0	0	0	0	0	0	0	0	0	0	0	0	0	0	0	0	0	0	0
MYB	TraesCS2B02G583800.1	0	0	0	0	0	0	0	0	0	0	0	0	0	0	0	0	0	0	0
MYB	TraesCS3B02G397100.1	0	0	0	0	0	0	0	0	0	0	0	0	0	0	0	0	0	0	0
MYB	TraesCS2A02G338200.1	0	1	1	0	0	1	1	0	1	1	1	0	1	0	0	0	0	0	8
MYB	TraesCS5B02G226100.1	0	0	0	0	0	0	0	0	0	0	0	0	0	0	0	0	0	0	0
MYB	TraesCS5A02G227400.1	0	0	0	0	0	0	0	0	0	0	0	0	0	0	0	0	0	0	0
MYB	TraesCS3B02G473600.1	0	0	0	0	0	0	0	0	0	0	0	0	0	0	0	0	0	0	0
MYB	TraesCS6D02G219500.1	0	0	0	1	1	1	1	0	1	0	0	0	0	0	0	0	0	0	5
MYB	TraesCS3A02G229500.1	0	0	0	1	1	1	1	0	1	0	0	0	0	0	0	0	0	0	5
MYB	TraesCS2A02G552400.1	0	0	0	0	0	0	0	0	0	0	0	0	0	0	0	0	0	0	0
MYB	TraesCS2D02G366800.1	0	0	0	0	0	0	0	0	0	0	0	0	0	0	0	0	0	0	0
MYB	TraesCS2A02G370300.1	0	0	0	0	0	0	0	0	0	0	0	0	0	0	0	0	0	0	0
MYB	TraesCS2B02G387300.1	0	0	0	0	0	0	0	0	0	0	0	0	0	0	0	0	0	0	0
MYB	TraesCS7A02G219600.1	0	0	0	0	0	0	0	0	0	0	0	0	0	0	0	0	0	0	0
MYB	TraesCS7D02G222600.1	0	0	0	0	0	0	0	0	0	0	0	0	0	0	0	0	0	0	0
MYB	TraesCS5A02G079100.1	1	0	0	0	0	1	0	0	0	0	0	0	0	0	0	0	0	0	1
MYB	TraesCS1A02G278900.1	1	0	0	0	0	0	0	0	0	0	0	0	0	0	0	0	0	0	0
MYB	TraesCS3B02G068900.1	0	0	0	0	0	0	0	0	0	0	0	0	0	0	0	0	0	0	0
MYB	TraesCS2B02G589700.1	0	0	0	0	0	0	0	0	0	0	0	0	0	0	0	0	0	0	0
MYB	TraesCS2D02G560100.1	0	0	0	0	0	0	0	0	0	0	0	0	0	0	0	0	0	0	0
MYB	TraesCS3B02G124100.1	0	0	0	0	0	0	0	0	0	0	0	0	0	0	0	0	0	0	0
MYB	TraesCS6A02G266400.2	0	1	1	0	0	1	1	0	1	0	0	0	0	0	0	0	1	0	6
MYB	TraesCS6B02G012800.1	0	0	0	0	0	0	0	0	0	0	0	0	0	0	0	0	0	0	0
MYB	TraesCS6D02G248300.2	0	1	1	0	0	1	1	0	1	0	0	0	0	0	0	0	1	0	6
MYB	TraesCS6D02G248300.1	0	0	0	0	0	0	0	0	0	0	0	0	0	0	0	0	0	0	0
MYB	TraesCS1D02G069700.2	0	0	0	0	0	0	0	0	0	0	0	0	0	0	0	0	0	0	0
MYB	TraesCS7B02G200700.1	0	0	0	0	0	0	0	0	0	0	0	0	0	0	0	0	0	0	0
MYB	TraesCS5A02G402800.1	0	1	1	0	0	1	1	0	1	0	0	0	0	0	0	0	1	0	6
MYB	TraesCS7A02G304600.3	0	0	0	0	0	0	0	0	0	0	0	0	0	0	0	0	0	0	0
MYB	TraesCS5A02G068900.2	0	0	0	0	0	0	0	0	0	0	0	0	0	0	0	0	0	0	0
MYB	TraesCS5D02G400100.2	0	1	1	0	0	1	1	0	1	0	0	0	0	0	0	0	1	0	6
MYB	TraesCS5A02G390300.2	0	1	1	0	0	1	1	0	1	0	0	0	0	0	0	0	1	0	6
MYB	TraesCS7A02G470700.1	0	0	0	0	0	0	0	0	0	0	0	0	0	0	0	0	0	0	0
MYB	TraesCS7D02G458000.1	0	0	0	0	0	0	0	0	0	0	0	0	0	0	0	0	0	0	0
MYB	TraesCS3A02G252000.5	0	0	0	0	0	0	0	0	0	0	0	0	0	0	0	0	0	0	0
MYB	TraesCS5A02G041500.1	0	0	0	0	0	0	0	0	0	0	0	0	0	0	0	0	0	0	0
MYB	TraesCS5B02G043100.1	0	0	0	0	0	0	0	0	0	0	0	0	0	0	0	0	0	0	0
MYB	TraesCS5D02G048400.1	0	0	0	0	0	0	0	0	0	0	0	0	0	0	0	0	0	0	0
MYB	TraesCS7D02G245800.1	0	0	0	0	0	0	0	0	0	0	0	0	0	0	0	0	0	0	0
MYB	TraesCS7B02G144300.1	0	0	0	0	0	0	0	0	0	0	0	0	0	0	0	0	0	0	0
MYB	TraesCS2B02G094500.1	0	0	0	0	0	0	0	0	0	0	0	0	0	0	0	0	0	0	0
MYB	TraesCS1D02G099600.1	1	0	0	0	0	1	0	0	0	0	0	0	0	0	0	0	0	0	1
MYB	TraesCS2A02G079700.1	0	0	0	0	0	0	0	0	0	0	0	0	0	0	0	0	0	0	0
MYB	TraesCS2D02G077000.1	0	0	0	0	0	0	0	0	0	0	0	0	0	0	0	0	0	0	0
MYB	TraesCS6A02G345400.1	0	0	0	0	0	0	0	0	0	0	0	0	0	0	0	0	0	0	0
MYB	TraesCS6D02G327900.1	0	0	0	0	0	0	0	0	0	0	0	0	0	0	0	0	0	0	0
MYB	TraesCS6B02G378200.1	0	0	0	0	0	0	0	0	0	0	0	0	0	0	0	0	0	0	0
MYB	TraesCS6B02G432500.1	0	0	0	0	0	0	0	0	0	0	0	0	0	0	0	0	0	0	0
MYB	TraesCS6D02G378100.1	0	0	0	0	0	0	0	0	0	0	0	0	0	0	0	0	0	0	0
MYB	TraesCS6A02G392300.1	0	0	0	0	0	0	0	0	0	0	0	0	0	0	0	0	0	0	0
MYB	TraesCS7D02G398200.1	0	0	0	0	0	0	0	0	0	0	0	0	0	0	0	0	0	0	0
MYB	TraesCS5B02G266200.1	0	0	0	0	0	0	0	0	0	0	0	0	0	0	0	0	0	0	0
MYB	TraesCS5D02G274400.1	0	0	0	0	0	0	0	0	0	0	0	0	0	0	0	0	0	0	0
MYB	TraesCS5A02G266600.2	0	0	0	0	0	0	0	0	0	0	0	0	0	0	0	0	0	0	0
MYB	TraesCS7A02G258600.1	0	0	0	0	0	0	0	0	0	0	0	0	0	0	0	0	0	0	0
MYB	TraesCSU02G029700.1	0	0	0	0	0	0	0	0	0	0	0	0	0	0	0	0	0	0	0
MYB	TraesCS1A02G439500.1	0	0	0	0	0	1	0	0	0	0	0	0	0	0	0	0	0	0	1
MYB	TraesCS1A02G439500.2	0	0	0	0	0	0	0	0	0	0	0	0	0	0	0	0	0	0	0
MYB	TraesCS5A02G540100.2	0	0	0	0	0	0	0	0	0	0	0	0	0	0	0	0	0	0	0
MYB	TraesCS1A02G176700.2	0	0	0	0	0	0	0	0	0	0	0	0	0	0	0	0	0	0	0
MYB	TraesCS1B02G203300.2	0	0	0	0	0	0	0	0	0	0	0	0	0	0	0	0	0	0	0
MYB	TraesCS6B02G431500.3	0	0	0	0	0	0	0	0	0	0	0	0	0	0	0	0	0	0	0
MYB	TraesCS1B02G474800.1	0	0	0	0	0	1	0	0	0	0	0	0	0	0	0	0	0	0	1
MYB	TraesCS1D02G448700.1	0	0	0	0	0	1	0	0	0	0	0	0	0	0	0	0	0	0	1
NAC	TraesCS7B02G187600.3	0	0	0	0	0	0	0	0	0	0	0	0	0	0	0	0	0	0	0
NAC	TraesCS7D02G295100.2	0	0	0	0	0	0	0	0	0	0	0	0	0	0	0	0	0	0	0
NAC	TraesCS7B02G187600.5	0	0	0	0	0	0	0	0	0	0	0	0	0	0	0	0	0	0	0
NAC	TraesCS6A02G003800.1	0	0	0	0	0	0	0	0	0	0	0	0	0	0	0	0	0	0	0
NAC	TraesCS5D02G279100.2	0	0	0	0	0	0	0	0	0	0	0	0	0	0	0	0	0	0	0
NAC	TraesCS7A02G000300.1	0	0	0	0	0	0	0	0	0	0	0	0	0	0	0	0	0	0	0
NAC	TraesCS7D02G000200.1	0	0	0	0	0	0	0	0	0	0	0	0	0	0	0	0	0	0	0
NAC	TraesCS4A02G499900.1	0	0	0	0	0	0	0	0	0	0	0	0	0	0	0	0	0	0	0
NAC	TraesCS3B02G472800.1	0	0	0	0	0	0	0	0	0	0	0	0	0	0	0	0	0	0	0
NAC	TraesCS3D02G431700.1	0	0	0	0	0	0	0	0	0	0	0	0	0	0	0	0	0	0	0
NAC	TraesCS6A02G208900.2	0	0	0	0	0	0	0	0	0	0	0	0	0	0	0	0	0	0	0
NAC	TraesCS5D02G111300.1	0	0	0	0	0	0	0	0	0	0	0	0	0	0	0	0	0	0	0
NAC	TraesCS7B02G481400.1	0	0	0	0	0	0	0	0	0	0	0	0	0	0	0	0	0	0	0
NAC	TraesCS4A02G213100.1	0	0	0	0	0	0	0	0	0	0	0	0	0	0	0	0	0	0	0
Zf-NF-X1	TraesCS7B02G432300.1	0	0	0	0	0	0	0	0	0	0	0	0	0	0	0	0	0	0	0
NF-YB	TraesCS1A02G288500.2	0	0	0	0	0	0	0	0	0	0	0	0	0	0	0	0	0	0	0
NF-YB	TraesCS1D02G287500.2	0	0	0	0	0	0	0	0	0	0	0	0	0	0	0	0	0	0	0
NF-YB	TraesCS1D02G419500.1	0	0	0	0	0	0	0	0	0	0	0	0	0	0	0	0	0	0	0
NF-YB	TraesCS1D02G419500.2	0	0	0	0	0	0	0	0	0	0	0	0	0	0	0	0	0	0	0
NF-YB	TraesCS3A02G450700.1	0	0	0	0	0	0	0	0	0	0	0	0	0	0	0	0	0	0	0
NF-YB	TraesCS3B02G487800.1	0	0	0	0	0	0	0	0	0	0	0	0	0	0	0	0	0	0	0
NF-YC	TraesCS2B02G239600.1	0	0	0	0	0	0	0	0	0	0	0	0	0	0	0	0	0	0	0
NF-YC	TraesCS2D02G220500.1	0	0	0	0	0	0	0	0	0	0	0	0	0	0	0	0	0	0	0
NF-YC	TraesCS7D02G488600.1	0	0	0	0	0	0	0	0	0	0	0	0	0	0	0	0	0	0	0
NF-YC	TraesCS1A02G288500.2	0	0	0	0	0	0	0	0	0	0	0	0	0	0	0	0	0	0	0
NF-YC	TraesCS1D02G287500.2	0	0	0	0	0	0	0	0	0	0	0	0	0	0	0	0	0	0	0
NF-YC	TraesCS3A02G534100.1	0	0	0	0	0	0	0	0	0	0	0	0	0	0	0	0	0	0	0
NF-YC	TraesCS1D02G419500.2	0	0	0	0	0	0	0	0	0	0	0	0	0	0	0	0	0	0	0
NF-YC	TraesCS1D02G419500.1	0	0	0	0	0	0	0	0	0	0	0	0	0	0	0	0	0	0	0
SBP	TraesCS2B02G250900.1	0	1	1	0	0	1	1	0	1	0	0	0	0	0	0	0	1	0	6
SBP	TraesCS2D02G232800.1	0	1	1	0	0	1	1	0	1	0	0	0	0	0	0	0	1	0	6
SBP	TraesCS2A02G232400.1	0	1	1	0	0	1	1	0	1	0	0	0	0	0	0	0	1	0	6
SBP	TraesCS3B02G468400.1	1	0	0	1	1	1	1	0	1	0	0	0	0	0	0	0	0	0	5
SBP	TraesCS3A02G432500.1	0	0	0	1	1	1	1	0	1	0	0	0	0	0	0	0	0	0	5
SBP	TraesCS3D02G425800.1	1	0	0	1	1	1	1	0	1	0	0	0	0	0	0	0	0	0	5
SBP	TraesCS7B02G402300.1	0	0	0	1	1	1	1	0	1	0	0	0	0	0	0	0	0	0	5
SBP	TraesCS2D02G410700.1	0	0	0	1	1	1	1	0	1	0	0	0	0	0	0	0	0	0	5
SBP	TraesCS2A02G413900.1	0	0	0	1	1	1	1	0	1	0	0	0	0	0	0	0	0	0	5
SBP	TraesCS7A02G249100.2	0	0	0	0	0	0	0	0	0	0	0	0	0	0	0	0	0	0	0
SBP	TraesCS7D02G248000.1	0	0	0	0	0	0	0	0	0	0	0	0	0	0	0	0	0	0	0
SBP	TraesCS5A02G286700.1	0	0	0	1	1	1	1	0	1	0	0	0	0	0	0	0	0	0	5
SBP	TraesCS5D02G294400.1	0	0	0	1	1	1	1	0	1	0	0	0	0	0	0	0	0	0	5
SBP	TraesCS5B02G286000.1	0	0	0	1	1	1	1	0	1	0	0	0	0	0	0	0	0	0	5
SBP	TraesCS5A02G286700.2	0	0	0	0	0	0	0	0	0	0	0	0	0	0	0	0	0	0	0
SRS	TraesCS3D02G497300.1	0	1	1	0	0	1	1	0	1	0	0	0	0	0	0	0	0	0	5
SRS	TraesCS5B02G319600.1	0	1	1	0	0	1	1	0	1	0	0	0	0	0	0	0	0	0	5
SRS	TraesCS5A02G319200.1	0	1	1	0	0	1	1	0	1	0	0	0	0	0	0	0	0	0	5
SRS	TraesCS5D02G325400.2	0	1	1	0	0	1	1	0	1	0	0	0	0	0	0	0	0	0	5
SRS	TraesCS7A02G270900.1	0	1	1	0	0	1	1	0	1	0	0	0	0	0	0	0	0	0	5
SRS	TraesCS7D02G271400.1	0	1	1	0	0	1	1	0	1	0	0	0	0	0	0	0	0	0	5
SRS	TraesCS7B02G169200.1	0	1	1	0	0	1	1	0	1	0	0	0	0	0	0	0	0	0	5
SRS	TraesCS7D02G400000.1	0	1	1	0	0	1	1	0	1	0	0	0	0	0	0	0	0	0	5
SRS	TraesCS1B02G253200.1	0	0	0	0	0	0	0	0	0	0	0	0	0	0	0	0	0	0	0
SRS	TraesCS1A02G241400.1	0	0	0	0	0	0	0	0	0	0	0	0	0	0	0	0	0	0	0
SRS	TraesCS1D02G241300.1	0	0	0	0	0	0	0	0	0	0	0	0	0	0	0	0	0	0	0
TCP	TraesCS6B02G262600.1	0	0	0	0	0	0	0	0	0	0	0	0	0	0	0	0	0	0	0
Trihelix	TraesCS1A02G176700.2	0	0	0	0	0	0	0	0	0	0	0	0	0	0	0	0	0	0	0
Trihelix	TraesCS1B02G203300.2	0	0	0	0	0	0	0	0	0	0	0	0	0	0	0	0	0	0	0
Trihelix	TraesCSU02G029700.1	0	0	0	0	0	0	0	0	0	0	0	0	0	0	0	0	0	0	0
Trihelix	TraesCS6B02G020100.1	1	0	0	0	0	0	0	0	0	0	0	0	0	0	0	0	0	0	0
Trihelix	TraesCS6A02G013200.1	0	0	0	0	0	0	0	0	0	0	0	0	0	0	0	0	0	0	0
Trihelix	TraesCS6A02G013200.2	1	0	0	0	0	0	0	0	0	0	0	0	0	0	0	0	0	0	0
Trihelix	TraesCS6D02G016300.1	1	0	0	0	0	0	0	0	0	0	0	0	0	0	0	0	0	0	0
Trihelix	TraesCS6A02G198600.1	0	0	0	0	0	0	0	0	0	0	0	0	0	0	0	0	0	0	0
Trihelix	TraesCS4A02G111300.1	0	0	0	0	0	0	0	0	0	0	0	0	0	0	0	0	0	0	0
Trihelix	TraesCS4D02G017200.1	0	0	0	0	0	0	0	0	0	0	0	0	0	0	0	0	0	0	0
Trihelix	TraesCS4A02G294700.2	0	0	0	0	0	0	0	0	0	0	0	0	0	0	0	0	0	0	0
Trihelix	TraesCS2A02G549300.1	0	0	0	0	0	0	0	0	0	0	0	0	0	0	0	0	0	0	0
Trihelix	TraesCS2D02G549900.1	0	0	0	0	0	0	0	0	0	0	0	0	0	0	0	0	0	0	0
Trihelix	TraesCS2B02G579700.1	0	0	0	0	0	0	0	0	0	0	0	0	0	0	0	0	0	0	0
VOZ	TraesCS6A02G003800.1	0	0	0	0	0	0	0	0	0	0	0	0	0	0	0	0	0	0	0
WRKY	TraesCS2A02G189700.3	0	0	0	0	0	0	0	0	0	0	0	0	0	0	0	0	0	0	0
WRKY	TraesCS2B02G217400.2	0	0	0	0	0	0	0	0	0	0	0	0	0	0	0	0	0	0	0
WRKY	TraesCS2A02G330500.1	0	0	0	0	0	0	0	0	0	0	0	0	0	0	0	0	0	0	0
WRKY	TraesCS2B02G351600.1	0	0	0	0	0	0	0	0	0	0	0	0	0	0	0	0	0	0	0
WRKY	TraesCS2D02G332300.1	0	0	0	0	0	0	0	0	0	0	0	0	0	0	0	0	0	0	0
WRKY	TraesCS4D02G151700.1	0	0	0	0	0	0	0	0	0	0	0	0	0	0	0	0	0	0	0
WRKY	TraesCS2D02G262100.1	0	0	0	0	0	0	0	0	0	0	0	0	0	0	0	0	0	0	0
WRKY	TraesCS6D02G136200.1	0	0	0	0	0	0	0	0	0	0	0	0	0	0	0	0	0	0	0
WRKY	TraesCS5D02G190700.1	0	0	0	0	0	0	0	0	0	0	0	0	0	0	0	0	0	0	0
WRKY	TraesCS5B02G183800.1	0	0	0	0	0	0	0	0	0	0	0	0	0	0	0	0	0	0	0
WRKY	TraesCS5A02G185700.1	0	0	0	0	0	0	0	0	0	0	0	0	0	0	0	0	0	0	0
WRKY	TraesCS5D02G190800.1	0	0	0	0	0	0	0	0	0	0	0	0	0	0	0	0	0	0	0
WRKY	TraesCS1A02G301100.1	0	0	0	0	0	0	0	0	0	0	0	0	0	0	0	0	0	0	0
WRKY	TraesCS5A02G146500.1	0	0	0	0	0	0	0	0	0	0	0	0	0	0	0	0	0	0	0
WRKY	TraesCS5B02G145300.1	0	0	0	0	0	0	0	0	0	0	0	0	0	0	0	0	0	0	0
FHA	TraesCS5B02G470200.4	0	0	0	0	0	0	0	0	0	0	0	0	0	0	0	0	0	0	0
FHA	TraesCS5D02G472100.3	0	0	0	0	0	0	0	0	0	0	0	0	0	0	0	0	0	0	0
FHA	TraesCS6B02G449300.2	0	0	0	0	0	0	0	0	0	0	0	0	0	0	0	0	0	0	0
FHA	TraesCS3A02G174400.1	0	0	0	0	0	0	0	0	0	0	0	0	0	0	0	0	0	0	0
FHA	TraesCS4D02G317000.4	0	0	0	0	0	0	0	0	0	0	0	0	0	0	0	0	0	0	0
FHA	TraesCS4B02G320500.2	0	0	0	0	0	0	0	0	0	0	0	0	0	0	0	0	0	0	0
FHA	TraesCS5A02G491500.1	1	0	0	0	0	0	0	0	0	0	0	0	0	0	0	0	0	0	0
FHA	TraesCS3A02G461400.1	0	0	0	1	1	1	1	0	1	0	0	0	0	0	0	0	0	0	5
FHA	TraesCS4A02G169300.5	0	0	0	0	0	0	0	0	0	0	0	0	0	0	0	0	0	0	0
FHA	TraesCS4D02G145100.9	0	0	0	0	0	0	0	0	0	0	0	0	0	0	0	0	0	0	0
FHA	TraesCS4D02G145100.5	0	0	0	0	0	0	0	0	0	0	0	0	0	0	0	0	0	0	0
PLATZ	TraesCS7D02G466400.1	0	0	0	0	0	0	0	0	0	0	0	0	0	0	0	0	0	0	0
PLATZ	TraesCS6D02G146600.1	0	0	0	0	0	0	0	0	0	0	0	0	0	0	0	0	0	0	0
PLATZ	TraesCS6A02G156600.1	0	0	0	0	0	0	0	0	0	0	0	0	0	0	0	0	0	0	0
PLATZ	TraesCS1B02G086700.1	1	0	0	0	0	0	0	0	0	0	0	0	0	0	0	0	0	0	0
PLATZ	TraesCS1A02G068200.1	1	0	0	0	0	0	0	0	0	0	0	0	0	0	0	0	0	0	0
PLATZ	TraesCS1D02G069600.1	1	0	0	0	0	0	0	0	0	0	0	0	0	0	0	0	0	0	0
Tub	TraesCS5A02G124100.1	0	0	0	0	0	0	0	0	0	0	0	0	0	0	0	0	0	0	0
Tub	TraesCS5D02G132000.1	0	0	0	0	0	0	0	0	0	0	0	0	0	0	0	0	0	0	0
Tub	TraesCS6A02G272800.1	0	0	0	0	0	0	0	0	0	0	0	0	0	0	0	0	0	0	0
TAZ	TraesCS2D02G339700.2	0	0	0	0	0	0	0	0	0	0	0	0	0	0	0	0	0	0	0
TAZ	TraesCS2B02G359400.1	1	0	0	0	0	0	0	0	0	0	0	0	0	0	0	0	0	0	0
Alfin-like	TraesCS2A02G172100.1	0	0	0	0	0	0	0	0	0	0	0	0	0	0	0	0	0	0	0
Alfin-like	TraesCS2B02G198500.1	0	0	0	0	0	0	0	0	0	0	0	0	0	0	0	0	0	0	0
Alfin-like	TraesCS2D02G179400.1	0	0	0	0	0	0	0	0	0	0	0	0	0	0	0	0	0	0	0
Alfin-like	TraesCS3A02G403600.1	0	0	0	0	0	0	0	0	0	0	0	0	0	0	0	0	0	0	0
Alfin-like	TraesCS3B02G437100.1	0	0	0	0	0	0	0	0	0	0	0	0	0	0	0	0	0	0	0
Alfin-like	TraesCS3D02G398800.2	0	0	0	0	0	0	0	0	0	0	0	0	0	0	0	0	0	0	0
Alfin-like	TraesCS1B02G129400.1	0	0	0	0	0	0	0	0	0	0	0	0	0	0	0	0	0	0	0
Alfin-like	TraesCS5D02G486400.1	0	0	0	0	0	0	0	0	0	0	0	0	0	0	0	0	0	0	0
Alfin-like	TraesCS5D02G486400.2	0	0	0	0	0	0	0	0	0	0	0	0	0	0	0	0	0	0	0
Alfin-like	TraesCS5B02G486600.1	0	0	0	0	0	0	0	0	0	0	0	0	0	0	0	0	0	0	0
Alfin-like	TraesCS5D02G138200.1	0	0	0	0	0	0	0	0	0	0	0	0	0	0	0	0	0	0	0
Alfin-like	TraesCS2A02G104700.1	0	0	0	0	0	0	0	0	0	0	0	0	0	0	0	0	0	0	0
Alfin-like	TraesCS5A02G130700.1	0	0	0	0	0	0	0	0	0	0	0	0	0	0	0	0	0	0	0
Alfin-like	TraesCS2B02G121700.1	0	0	0	0	0	0	0	0	0	0	0	0	0	0	0	0	0	0	0
Alfin-like	TraesCS2D02G104400.1	0	0	0	0	0	0	0	0	0	0	0	0	0	0	0	0	0	0	0
Alfin-like	TraesCS5D02G138300.2	0	0	0	0	0	0	0	0	0	0	0	0	0	0	0	0	0	0	0
Alfin-like	TraesCS4D02G050000.1	0	0	0	0	0	0	0	0	0	0	0	0	0	0	0	0	0	0	0
Alfin-like	TraesCS2D02G129400.1	0	0	0	0	0	0	0	0	0	0	0	0	0	0	0	0	0	0	0
Alfin-like	TraesCS5A02G130800.2	0	0	0	0	0	0	0	0	0	0	0	0	0	0	0	0	0	0	0
Alfin-like	TraesCS3D02G521900.1	0	0	0	1	1	1	1	0	1	0	0	0	0	0	0	0	0	0	5
Alfin-like	TraesCS2D02G038100.2	0	0	0	0	0	0	0	0	0	0	0	0	0	0	0	0	0	0	0
Alfin-like	TraesCS2A02G039500.1	0	0	0	0	0	0	0	0	0	0	0	0	0	0	0	0	0	0	0
Alfin-like	TraesCS2B02G052300.2	0	0	0	0	0	0	0	0	0	0	0	0	0	0	0	0	0	0	0
Alfin-like	TraesCS3B02G322600.1	0	0	0	0	0	0	0	0	0	0	0	0	0	0	0	0	0	0	0
BSD	TraesCS4A02G231600.1	0	0	0	0	0	0	0	0	0	0	0	0	0	0	0	0	0	0	0
BSD	TraesCS2D02G496000.1	0	0	0	0	0	0	0	0	0	0	0	0	0	0	0	0	0	0	0
BSD	TraesCS2B02G524000.1	0	0	0	0	0	0	0	0	0	0	0	0	0	0	0	0	0	0	0
CSD	TraesCS6B02G093900.1	0	0	0	0	0	0	0	0	0	0	0	0	0	0	0	0	0	0	0
CSD	TraesCS6A02G069500.1	0	0	0	1	1	1	1	0	1	0	0	0	0	0	0	0	0	0	5
CSD	TraesCS6D02G067500.1	0	0	0	0	0	0	0	0	0	0	0	0	0	0	0	0	0	0	0
CSD	TraesCS1A02G262400.1	0	0	0	1	1	1	1	0	1	0	0	0	0	0	0	0	0	0	5
CSD	TraesCS1D02G262500.1	1	0	0	1	1	1	1	0	1	0	0	0	0	0	0	0	0	0	5
CSD	TraesCS1D02G262400.1	1	0	0	1	1	1	1	0	1	0	0	0	0	0	0	0	0	0	5
CSD	TraesCS1B02G273000.2	1	0	0	1	1	1	1	0	1	0	0	0	0	0	0	0	0	0	5
DBP-DNC	TraesCS7B02G045100.1	0	0	0	0	0	0	0	0	0	0	0	0	0	0	0	0	0	0	0
DBP-DNC	TraesCS7D02G144400.3	0	0	0	0	0	0	0	0	0	0	0	0	0	0	0	0	0	0	0
OFP	TraesCS2A02G296700.1	0	0	0	0	0	0	0	0	0	0	0	0	0	0	0	0	0	0	0
OFP	TraesCS4A02G198600.1	0	0	0	0	0	0	0	0	0	0	0	0	0	0	0	0	0	0	0
tify	TraesCS7B02G323300.1	0	0	0	0	0	0	0	0	0	0	0	0	0	0	0	0	0	0	0
mTERF	TraesCS6D02G325000.1	0	0	0	0	0	0	0	0	0	0	0	0	0	0	0	0	0	0	0
mTERF	TraesCS6A02G343900.1	0	0	0	0	0	0	0	0	0	0	0	0	0	0	0	0	0	0	0
mTERF	TraesCS6B02G376100.1	0	0	0	0	0	0	0	0	0	0	0	0	0	0	0	0	0	0	0
mTERF	TraesCS6B02G027100.1	0	0	0	0	0	0	0	0	0	0	0	0	0	0	0	0	0	0	0
mTERF	TraesCS6B02G023300.1	0	0	0	0	0	0	0	0	0	0	0	0	0	0	0	0	0	0	0
mTERF	TraesCSU02G085400.1	0	0	0	0	0	0	0	0	0	0	0	0	0	0	0	0	0	0	0
mTERF	TraesCS1A02G440100.2	0	0	0	0	0	0	0	0	0	0	0	0	0	0	0	0	0	0	0
mTERF	TraesCS6D02G018100.1	0	0	0	0	0	0	0	0	0	0	0	0	0	0	0	0	0	0	0
mTERF	TraesCS6A02G058000.1	0	0	0	0	0	0	0	0	0	0	0	0	0	0	0	0	0	0	0
mTERF	TraesCS6D02G020100.1	0	0	0	0	0	0	0	0	0	0	0	0	0	0	0	0	0	0	0
C2C2-Dof	TraesCS6A02G274000.1	0	0	0	0	0	0	0	0	0	0	0	0	0	0	0	0	0	0	0
C2C2-Dof	TraesCS6B02G301500.1	0	0	0	0	0	0	0	0	0	0	0	0	0	0	0	0	0	0	0
C2C2-Dof	TraesCS5B02G087600.3	0	0	0	0	0	0	0	0	0	0	0	0	0	0	0	0	0	0	0
C2C2-Dof	TraesCS2A02G590700.1	0	0	0	0	0	0	0	0	0	0	0	0	0	0	0	0	0	0	0
C2C2-Dof	TraesCS2D02G563400.1	1	0	0	0	0	0	0	0	0	0	0	0	0	0	0	0	0	0	0
C2C2-Dof	TraesCS2B02G592900.1	0	0	0	0	0	0	0	0	0	0	0	0	0	0	0	0	0	0	0
LSD	TraesCS1B02G288600.3	0	0	0	0	0	0	0	0	0	0	0	0	0	0	0	0	0	0	0
YABBY	TraesCS5D02G033700.1	0	0	0	0	0	0	0	0	0	0	0	0	0	0	0	0	0	0	0
YABBY	TraesCS1D02G162600.1	0	0	0	0	0	1	1	0	0	1	1	0	1	0	0	0	0	0	5
YABBY	TraesCS1A02G176300.1	0	0	0	0	0	1	1	0	0	1	1	0	1	0	0	0	0	0	5
YABBY	TraesCS1B02G203800.1	0	0	0	0	0	1	1	0	0	1	1	0	1	0	0	0	0	0	5
YABBY	TraesCS4A02G058800.1	0	1	1	1	1	1	1	0	1	1	1	0	1	0	0	0	1	1	12
YABBY	TraesCS4A02G058800.3	0	0	0	0	0	0	0	0	0	0	0	0	0	0	0	0	0	0	0
Total number		62	64	67	41	41	169	126	0	107	22	42	10	31	6	4	5	50	29

## Sheet: Sheet2
gynoecium development (GO:0048467)	42hub	match		BES1	9hubTF		code	Name	9 hub TF		BES1-hub		published 15 TF		67 TF
TraesCS3D02G434700.1	TraesCS1A02G066200.1	#N/A		TraesCS3B02G156600.1	TraesCS2A02G187800.1	5	1	TraesCS1A02G066200.1	#N/A		#N/A		TraesCS3B02G157500.1	ARF	TraesCS3D02G434700.1	#N/A	TraesCS3D02G434700.1
TraesCS3B02G475800.1	TraesCS1A02G233800.1	#N/A		TraesCS3D02G139300.1	TraesCS2B02G219300.1	6	2	TraesCS1A02G233800.1	#N/A		#N/A		TraesCS3B02G157500.2	ARF	TraesCS3B02G475800.1	#N/A	TraesCS3B02G475800.1
TraesCS3A02G442000.1	TraesCS1B02G084500.1	#N/A		TraesCS2D02G199900.1	TraesCS2B02G497500.1	#N/A	3	TraesCS1B02G084500.1	#N/A		#N/A		TraesCS1A02G125800.1	ARF	TraesCS3A02G442000.1	#N/A	TraesCS3A02G442000.1
TraesCS3D02G442000.5	TraesCS1B02G479300.1	#N/A		TraesCS2A02G187800.1	TraesCS2D02G199900.1	4	4	TraesCS1B02G479300.1	#N/A		#N/A		TraesCS5B02G115100.1	ARF	TraesCS3D02G442000.5	#N/A	TraesCS3D02G442000.5
TraesCS3A02G449300.2	TraesCS2A02G187800.1	9		TraesCS2B02G219300.1	TraesCS2D02G473700.1	#N/A	5	TraesCS2A02G187800.1	2		5		TraesCS6D02G240200.2	ARF	TraesCS3A02G449300.2	#N/A	TraesCS3A02G449300.2
TraesCS3B02G486000.1	TraesCS2A02G397200.1	#N/A		TraesCSU02G078100.3	TraesCS4A02G016600.1	#N/A	6	TraesCS2A02G397200.1	#N/A		#N/A		TraesCS6B02G286400.2	ARF	TraesCS3B02G486000.1	#N/A	TraesCS3B02G486000.1
TraesCS2D02G199900.1	TraesCS2B02G219300.1	10			TraesCS4D02G286400.1	#N/A	7	TraesCS2B02G219300.1	3		6		TraesCS5B02G286100.2	BES1	TraesCS2D02G199900.1	#N/A	TraesCS2D02G199900.1
TraesCS2A02G187800.1	TraesCS2B02G415500.1	#N/A			TraesCS7A02G308400.1	#N/A	8	TraesCS2B02G415500.1	#N/A		#N/A		TraesCS5A02G286800.1	BES1	TraesCS2A02G187800.1	#N/A	TraesCS2A02G187800.1
TraesCS2B02G219300.1	TraesCS2B02G497500.1	18			TraesCS7D02G305200.2	#N/A	9	TraesCS2B02G497500.1	4		#N/A		TraesCS6B02G186700.1	BES1	TraesCS2B02G219300.1	#N/A	TraesCS2B02G219300.1
TraesCS5A02G250600.1	TraesCS2D02G116700.1	#N/A					10	TraesCS2D02G116700.1	#N/A		#N/A		TraesCS1A02G262700.1	bHLH	TraesCS5A02G250600.1	#N/A	TraesCS5A02G250600.1
TraesCS7B02G303300.1	TraesCS2D02G199900.1	8					11	TraesCS2D02G199900.1	5		4		TraesCS6A02G259000.3	bHLH	TraesCS7B02G303300.1	#N/A	TraesCS7B02G303300.1
TraesCS7A02G404400.1	TraesCS2D02G395000.1	#N/A					12	TraesCS2D02G395000.1	#N/A		#N/A		TraesCS6A02G259000.1	C2H2	TraesCS7A02G404400.1	#N/A	TraesCS7A02G404400.1
TraesCS7D02G397800.1	TraesCS2D02G473700.1	20					13	TraesCS2D02G473700.1	6		#N/A		TraesCS5A02G227400.1	C2H2	TraesCS7D02G397800.1	#N/A	TraesCS7D02G397800.1
TraesCS6A02G266400.2	TraesCS3A02G140100.1	#N/A					14	TraesCS3A02G140100.1	#N/A		#N/A		TraesCS4A02G058800.1	GARP	TraesCS6A02G266400.2	#N/A	TraesCS6A02G266400.2
TraesCS6D02G248300.2	TraesCS3A02G441700.1	#N/A					15	TraesCS3A02G441700.1	#N/A		#N/A		TraesCS4A02G058800.3	GARP	TraesCS6D02G248300.2	#N/A	TraesCS6D02G248300.2
TraesCS5A02G402800.1	TraesCS3A02G495400.1	#N/A					16	TraesCS3A02G495400.1	#N/A		#N/A			GARP	TraesCS5A02G402800.1	#N/A	TraesCS5A02G402800.1
TraesCS2B02G497500.1	TraesCS3B02G164500.1	#N/A					17	TraesCS3B02G164500.1	#N/A		#N/A			HB	TraesCS2B02G497500.1	#N/A	TraesCS2B02G497500.1
TraesCS2A02G474000.1	TraesCS3B02G248200.1	#N/A					18	TraesCS3B02G248200.1	#N/A		#N/A			HB	TraesCS2A02G474000.1	#N/A	TraesCS2A02G474000.1
TraesCS2D02G473700.1	TraesCS3B02G475600.1	#N/A					19	TraesCS3B02G475600.1	#N/A		#N/A			HB	TraesCS2D02G473700.1	#N/A	TraesCS2D02G473700.1
TraesCS7D02G305200.2	TraesCS3B02G543300.1	#N/A					20	TraesCS3B02G543300.1	#N/A		#N/A			HB	TraesCS7D02G305200.2	#N/A	TraesCS7D02G305200.2
TraesCS7A02G308400.1	TraesCS3D02G191600.4	#N/A					21	TraesCS3D02G191600.4	#N/A		#N/A			HB	TraesCS7A02G308400.1	#N/A	TraesCS7A02G308400.1
TraesCS7B02G208600.1	TraesCS3D02G502600.1	#N/A					22	TraesCS3D02G502600.1	#N/A		#N/A			HB	TraesCS7B02G208600.1	#N/A	TraesCS7B02G208600.1
TraesCS7A02G083800.1	TraesCS4A02G016600.1	27					23	TraesCS4A02G016600.1	7		#N/A			HB	TraesCS7A02G083800.1	#N/A	TraesCS7A02G083800.1
TraesCS4D02G286400.1	TraesCS4A02G059000.1	#N/A					24	TraesCS4A02G059000.1	#N/A		#N/A			HB	TraesCS4D02G286400.1	#N/A	TraesCS4D02G286400.1
TraesCS4B02G287600.1	TraesCS4A02G119800.1	#N/A					25	TraesCS4A02G119800.1	#N/A		#N/A			HB	TraesCS4B02G287600.1	#N/A	TraesCS4B02G287600.1
TraesCS4A02G016600.1	TraesCS4A02G265100.1	#N/A					26	TraesCS4A02G265100.1	#N/A		#N/A			HB	TraesCS4A02G016600.1	#N/A	TraesCS4A02G016600.1
TraesCS3D02G357400.1	TraesCS4D02G050200.1	#N/A					27	TraesCS4D02G050200.1	#N/A		#N/A			HB	TraesCS3D02G357400.1	#N/A	TraesCS3D02G357400.1
TraesCS3A02G363900.1	TraesCS4D02G235800.1	#N/A					28	TraesCS4D02G235800.1	#N/A		#N/A			HB	TraesCS3A02G363900.1	#N/A	TraesCS3A02G363900.1
TraesCS1B02G091700.1	TraesCS4D02G286400.1	25					29	TraesCS4D02G286400.1	8		#N/A			HB	TraesCS1B02G091700.1	#N/A	TraesCS1B02G091700.1
TraesCS6B02G286400.2	TraesCS5A02G407500.2	#N/A					30	TraesCS5A02G407500.2	#N/A		#N/A			MIKC	TraesCS6B02G286400.2	7	TraesCS6B02G286400.2
TraesCS6D02G240200.2	TraesCS5B02G563900.2	#N/A					31	TraesCS5B02G563900.2	#N/A		#N/A			MIKC	TraesCS6D02G240200.2	6	TraesCS6D02G240200.2
TraesCS6A02G259000.3	TraesCS5D02G550700.1	#N/A					32	TraesCS5D02G550700.1	#N/A		#N/A			MIKC	TraesCS6A02G259000.3	12	TraesCS6A02G259000.3
TraesCS5A02G286800.1	TraesCS7A02G284900.2	#N/A					33	TraesCS7A02G284900.2	#N/A		#N/A			MIKC	TraesCS5A02G286800.1	9	TraesCS5A02G286800.1
TraesCS5D02G294500.1	TraesCS7A02G308400.1	22					34	TraesCS7A02G308400.1	9		#N/A			MIKC	TraesCS5D02G294500.1	#N/A	TraesCS5D02G294500.1
TraesCS5B02G286100.2	TraesCS7B02G146100.1	#N/A					35	TraesCS7B02G146100.1	#N/A		#N/A			MIKC	TraesCS5B02G286100.2	8	TraesCS5B02G286100.2
TraesCS3B02G157500.2	TraesCS7B02G181700.1	#N/A					36	TraesCS7B02G181700.1	#N/A		#N/A			MIKC	TraesCS3B02G157500.2	3	TraesCS3B02G157500.2
TraesCS1D02G127700.2	TraesCS7B02G267900.1	#N/A					37	TraesCS7B02G267900.1	#N/A		#N/A			MIKC	TraesCS1D02G127700.2	#N/A	TraesCS1D02G127700.2
TraesCS1B02G144800.3	TraesCS7D02G244000.1	#N/A					38	TraesCS7D02G244000.1	#N/A		#N/A			MIKC	TraesCS1B02G144800.3	#N/A	TraesCS1B02G144800.3
TraesCS6B02G186700.1	TraesCS7D02G291200.3	#N/A					39	TraesCS7D02G291200.3	#N/A		#N/A			MIKC	TraesCS6B02G186700.1	10	TraesCS6B02G186700.1
TraesCS6A02G158100.1	TraesCS7D02G305200.2	21					40	TraesCS7D02G305200.2	10		#N/A			MIKC	TraesCS6A02G158100.1	#N/A	TraesCS6A02G158100.1
TraesCS6D02G147400.1	TraesCS7D02G313000.1	#N/A					41	TraesCS7D02G313000.1	#N/A		#N/A			MIKC	TraesCS6D02G147400.1	#N/A	TraesCS6D02G147400.1
TraesCS2A02G422400.1	TraesCS7D02G416400.1	#N/A					42	TraesCS7D02G416400.1	#N/A		#N/A			MIKC	TraesCS2A02G422400.1	#N/A	TraesCS2A02G422400.1
TraesCS2D02G418800.1														M-type	TraesCS2D02G418800.1	#N/A	TraesCS2D02G418800.1
TraesCS1A02G125800.1														M-type	TraesCS1A02G125800.1	4	TraesCS1A02G125800.1
TraesCS5B02G115100.1														M-type	TraesCS5B02G115100.1	5	TraesCS5B02G115100.1
TraesCS1D02G262700.1														M-type	TraesCS1D02G262700.1	#N/A	TraesCS1D02G262700.1
TraesCS1B02G273300.1														M-type	TraesCS1B02G273300.1	#N/A	TraesCS1B02G273300.1
TraesCS1A02G262700.1														M-type	TraesCS1A02G262700.1	11	TraesCS1A02G262700.1
TraesCS2B02G343800.1														MYB	TraesCS2B02G343800.1	#N/A	TraesCS2B02G343800.1
TraesCS2A02G338200.1														MYB	TraesCS2A02G338200.1	#N/A	TraesCS2A02G338200.1
TraesCS6A02G266400.2														MYB	TraesCS6A02G266400.2	#N/A	TraesCS6A02G266400.2
TraesCS6D02G248300.2														MYB	TraesCS6D02G248300.2	#N/A	TraesCS6D02G248300.2
TraesCS5A02G402800.1														MYB	TraesCS5A02G402800.1	#N/A	TraesCS5A02G402800.1
TraesCS5D02G400100.2														MYB	TraesCS5D02G400100.2	#N/A	TraesCS5D02G400100.2
TraesCS5A02G390300.2														MYB	TraesCS5A02G390300.2	#N/A	TraesCS5A02G390300.2
TraesCS2B02G250900.1														SBP	TraesCS2B02G250900.1	#N/A	TraesCS2B02G250900.1
TraesCS2D02G232800.1														SBP	TraesCS2D02G232800.1	#N/A	TraesCS2D02G232800.1
TraesCS2A02G232400.1														SBP	TraesCS2A02G232400.1	#N/A	TraesCS2A02G232400.1
TraesCS3D02G497300.1														SRS	TraesCS3D02G497300.1	#N/A	TraesCS3D02G497300.1
TraesCS5B02G319600.1														SRS	TraesCS5B02G319600.1	#N/A	TraesCS5B02G319600.1
TraesCS5A02G319200.1														SRS	TraesCS5A02G319200.1	#N/A	TraesCS5A02G319200.1
TraesCS5D02G325400.2														SRS	TraesCS5D02G325400.2	#N/A	TraesCS5D02G325400.2
TraesCS7A02G270900.1														SRS	TraesCS7A02G270900.1	#N/A	TraesCS7A02G270900.1
TraesCS7D02G271400.1														SRS	TraesCS7D02G271400.1	#N/A	TraesCS7D02G271400.1
TraesCS7B02G169200.1														SRS	TraesCS7B02G169200.1	#N/A	TraesCS7B02G169200.1
TraesCS7D02G400000.1														SRS	TraesCS7D02G400000.1	#N/A	TraesCS7D02G400000.1
TraesCS4A02G058800.1														YABBY	TraesCS4A02G058800.1	15	TraesCS4A02G058800.1
