# Supplementary material for: Co-expression network analysis of genes and networks associated with wheat pistillody
Source: PeerJ. 2022 Aug 24;10:e13902. doi: 10.7717/peerj.13902 (PMC9419718; doi:10.7717/peerj.13902)
Supplement: Table S4 [file peerj-10-13902-s004.xlsx]

## Sheet: Table S4
Family	Nucleotide ID	Query Proteins	Subject Proteins	Identity	Query_start	Query_end	Subject_start	Subject_end	Expect	Score	Quer_length	Coverage=Query_end-Query_start+1)/Query_length	carpel development (GO:0048440)	stamen development (GO:0048443）	Reference	Note	Gene Name
MADS-box	KX354939	ANM72765.1	TraesCS3B02G157500.2	93.82	1	272	1	275	4e-117	412	272	1	1	1	Yang W, Lou X, Li J, Pu M, Mirbahar AA, Liu D, Sun J, Zhan K, He L, Zhang A: Cloning and functional analysis of MADS-box genes, TaAG-A and TaAG-B, from a wheat K-type cytoplasmic male sterile line. Frontiers in Plant Science, 2017, 8:1081.)		TaAG-A
MADS-box	KX354940	ANM72766.1	TraesCS3B02G157500.1	99.28	1	276	1	276	2e-121	426	276	1	0	0	Yang W, Lou X, Li J, Pu M, Mirbahar AA, Liu D, Sun J, Zhan K, He L, Zhang A: Cloning and functional analysis of MADS-box genes, TaAG-A and TaAG-B, from a wheat K-type cytoplasmic male sterile line. Frontiers in Plant Science, 2017, 8:1082.)		TaAG-B
MADS-box	KT188782	ALM58841.1	TraesCS3B02G157500.1	94.57	1	273	1	276	1e-117	414	273	1	0	0	wenhan Hu,Shuhong Wei: Codon usage bias of the wheat flower development gene WAG-2 and other AGAMOUS group genes. Journal of Agricultural Science, 2017, 9: 56-67.
MADS-box	KT188783	ALM58842.1	TraesCS3B02G157500.1	96.38	1	274	1	276	1e-121	427	274	1	0	0	wenhan Hu,Shuhong Wei: Codon usage bias of the wheat flower development gene WAG-2 and other AGAMOUS group genes. Journal of Agricultural Science, 2017, 9: 56-68.
MADS-box	KT188784	ALM58843.1	TraesCS3B02G157500.2	100	1	275	1	275	5e-123	431	275	1	1	1	wenhan Hu,Shuhong Wei: Codon usage bias of the wheat flower development gene WAG-2 and other AGAMOUS group genes. Journal of Agricultural Science, 2017, 9: 56-69.
MADS-box	KT188785	ALM58844.1	TraesCS3B02G157500.1	98.91	1	276	1	276	6e-121	424	276	1	0	0	wenhan Hu,Shuhong Wei: Codon usage bias of the wheat flower development gene WAG-2 and other AGAMOUS group genes. Journal of Agricultural Science, 2017, 9: 56-70.
MADS-box	AB084577	BAC22939.1	TraesCS1A02G125800.1	98.43	1	254	16	269	3e-114	402	254	1	1	1	wenhan Hu,Shuhong Wei: Codon usage bias of the wheat flower development gene WAG-2 and other AGAMOUS group genes. Journal of Agricultural Science, 2017, 9: 56-71.
MADS-box	AM502861	CAM59039.1	TraesCS6D02G240200.2	48.24	1	170	1	169	1e-35	141	230	0.73913	1	0	Paolacci A. R., Tanzarella O. A., Porceddu E., Varotto S., Ciaffi M. (2007). Molecular and phylogenetic analysis of MADS-box genes of MIKC type and chromosome location of SEP-like genes in wheat (Triticum aestivum L.). Mol Genet Genomics 278:689-708	MIKC-type
MADS-box	AM505862	CAM59040.1	TraesCS6D02G240200.2	48	1	175	1	174	2e-37	147	229	0.764192	1	0	Paolacci A. R., Tanzarella O. A., Porceddu E., Varotto S., Ciaffi M. (2007). Molecular and phylogenetic analysis of MADS-box genes of MIKC type and chromosome location of SEP-like genes in wheat (Triticum aestivum L.). Mol Genet Genomics 278:689-708	MIKC-type
MADS-box	AM502863	CAM59041.1	TraesCS1A02G125800.1	98.88	1	269	1	269	3e-122	429	269	1	1	1	Paolacci A. R., Tanzarella O. A., Porceddu E., Varotto S., Ciaffi M. (2007). Molecular and phylogenetic analysis of MADS-box genes of MIKC type and chromosome location of SEP-like genes in wheat (Triticum aestivum L.). Mol Genet Genomics 278:689-708	MIKC-type
MADS-box	AM502864	CAM59042.1	TraesCS5B02G115100.1	96.43	1	252	1	252	4e-120	422	252	1	1	1	Paolacci A. R., Tanzarella O. A., Porceddu E., Varotto S., Ciaffi M. (2007). Molecular and phylogenetic analysis of MADS-box genes of MIKC type and chromosome location of SEP-like genes in wheat (Triticum aestivum L.). Mol Genet Genomics 278:689-708	MIKC-type
MADS-box	AM502865	CAM59043.1	TraesCS5B02G115100.1	95.28	1	254	1	252	1e-118	417	254	1	1	1	Paolacci A. R., Tanzarella O. A., Porceddu E., Varotto S., Ciaffi M. (2007). Molecular and phylogenetic analysis of MADS-box genes of MIKC type and chromosome location of SEP-like genes in wheat (Triticum aestivum L.). Mol Genet Genomics 278:689-708	MIKC-type
MADS-box	AM502866	CAM59044.1	TraesCS5A02G286800.1	60.67	1	174	1	178	4e-51	192	248	0.701613	1	1	Paolacci A. R., Tanzarella O. A., Porceddu E., Varotto S., Ciaffi M. (2007). Molecular and phylogenetic analysis of MADS-box genes of MIKC type and chromosome location of SEP-like genes in wheat (Triticum aestivum L.). Mol Genet Genomics 278:689-708	MIKC-type
MADS-box	AM502867	CAM59045.1	TraesCS5A02G286800.1	50.2	1	229	1	248	3e-52	196	238	0.962185	1	1	Paolacci A. R., Tanzarella O. A., Porceddu E., Varotto S., Ciaffi M. (2007). Molecular and phylogenetic analysis of MADS-box genes of MIKC type and chromosome location of SEP-like genes in wheat (Triticum aestivum L.). Mol Genet Genomics 278:689-708	MIKC-type
MADS-box	AM502868	CAM59046.1	TraesCS5A02G286800.1	61.24	1	174	1	178	1e-50	191	225	0.773333	1	1	Paolacci A. R., Tanzarella O. A., Porceddu E., Varotto S., Ciaffi M. (2007). Molecular and phylogenetic analysis of MADS-box genes of MIKC type and chromosome location of SEP-like genes in wheat (Triticum aestivum L.). Mol Genet Genomics 278:689-708	MIKC-type
MADS-box	AM502869	CAM59047.1	TraesCS5A02G286800.1	55.98	1	182	1	184	2e-47	180	244	0.745902	1	1	Paolacci A. R., Tanzarella O. A., Porceddu E., Varotto S., Ciaffi M. (2007). Molecular and phylogenetic analysis of MADS-box genes of MIKC type and chromosome location of SEP-like genes in wheat (Triticum aestivum L.). Mol Genet Genomics 278:689-708	MIKC-type
MADS-box	AM502870	CAM59048.1	TraesCS6A02G259000.1	43.35	1	261	1	259	5e-45	172	267	0.977528	0	0	Paolacci A. R., Tanzarella O. A., Porceddu E., Varotto S., Ciaffi M. (2007). Molecular and phylogenetic analysis of MADS-box genes of MIKC type and chromosome location of SEP-like genes in wheat (Triticum aestivum L.). Mol Genet Genomics 278:689-708	MIKC-type
MADS-box	AM502871	CAM59049.1	TraesCS5A02G286800.1	50.98	1	202	1	204	3e-46	176	274	0.737226	1	1	Paolacci A. R., Tanzarella O. A., Porceddu E., Varotto S., Ciaffi M. (2007). Molecular and phylogenetic analysis of MADS-box genes of MIKC type and chromosome location of SEP-like genes in wheat (Triticum aestivum L.). Mol Genet Genomics 278:689-708	MIKC-type
MADS-box	AM502872	CAM59050.1	TraesCS6D02G240200.2	99.23	1	259	1	259	2e-135	473	259	1	1	0	Paolacci A. R., Tanzarella O. A., Porceddu E., Varotto S., Ciaffi M. (2007). Molecular and phylogenetic analysis of MADS-box genes of MIKC type and chromosome location of SEP-like genes in wheat (Triticum aestivum L.). Mol Genet Genomics 278:689-708	MIKC-type
MADS-box	AM502873	CAM59051.1	TraesCS6B02G286400.2	97.67	1	258	1	258	2e-136	476	258	1	1	0	Paolacci A. R., Tanzarella O. A., Porceddu E., Varotto S., Ciaffi M. (2007). Molecular and phylogenetic analysis of MADS-box genes of MIKC type and chromosome location of SEP-like genes in wheat (Triticum aestivum L.). Mol Genet Genomics 278:689-708	MIKC-type
MADS-box	AM502874	CAM59052.1	TraesCS6B02G286400.2	99.61	1	258	1	258	3e-139	485	258	1	1	0	Paolacci A. R., Tanzarella O. A., Porceddu E., Varotto S., Ciaffi M. (2007). Molecular and phylogenetic analysis of MADS-box genes of MIKC type and chromosome location of SEP-like genes in wheat (Triticum aestivum L.). Mol Genet Genomics 278:689-708	MIKC-type
MADS-box	AM502875	CAM59053.1	TraesCS5B02G286100.2	99.21	1	252	1	252	3e-132	462	252	1	1	1	Paolacci A. R., Tanzarella O. A., Porceddu E., Varotto S., Ciaffi M. (2007). Molecular and phylogenetic analysis of MADS-box genes of MIKC type and chromosome location of SEP-like genes in wheat (Triticum aestivum L.). Mol Genet Genomics 278:689-708	MIKC-type
MADS-box	AM502876	CAM59054.1	TraesCS5A02G286800.1	96.43	1	252	1	252	7e-130	454	252	1	1	1	Paolacci A. R., Tanzarella O. A., Porceddu E., Varotto S., Ciaffi M. (2007). Molecular and phylogenetic analysis of MADS-box genes of MIKC type and chromosome location of SEP-like genes in wheat (Triticum aestivum L.). Mol Genet Genomics 278:689-708	MIKC-type
MADS-box	AM502877	CAM59055.1	TraesCS5A02G286800.1	75.4	1	246	1	252	3e-98	349	246	1	1	1	Paolacci A. R., Tanzarella O. A., Porceddu E., Varotto S., Ciaffi M. (2007). Molecular and phylogenetic analysis of MADS-box genes of MIKC type and chromosome location of SEP-like genes in wheat (Triticum aestivum L.). Mol Genet Genomics 278:689-708	MIKC-type
MADS-box	AM502878	CAM59056.1	TraesCS6A02G259000.3	41.86	1	172	1	170	1e-30	124	224	0.767857	1	0	Paolacci A. R., Tanzarella O. A., Porceddu E., Varotto S., Ciaffi M. (2007). Molecular and phylogenetic analysis of MADS-box genes of MIKC type and chromosome location of SEP-like genes in wheat (Triticum aestivum L.). Mol Genet Genomics 278:689-708	MIKC-type
MADS-box	AM502879	CAM59057.1	TraesCS6B02G186700.1	40.91	1	153	1	154	4e-32	129	229	0.668122	1	0	Paolacci A. R., Tanzarella O. A., Porceddu E., Varotto S., Ciaffi M. (2007). Molecular and phylogenetic analysis of MADS-box genes of MIKC type and chromosome location of SEP-like genes in wheat (Triticum aestivum L.). Mol Genet Genomics 278:689-708	MIKC-type
MADS-box	AM502880	CAM59058.1	TraesCS6B02G186700.1	35.42	1	206	1	238	3e-30	123	208	0.990385	1	0	Paolacci A. R., Tanzarella O. A., Porceddu E., Varotto S., Ciaffi M. (2007). Molecular and phylogenetic analysis of MADS-box genes of MIKC type and chromosome location of SEP-like genes in wheat (Triticum aestivum L.). Mol Genet Genomics 278:689-708	MIKC-type
MADS-box	AM502881	CAM59059.1	TraesCS6A02G158100.1	34.31	1	207	1	238	2e-31	127	209	0.990431	1	0	Paolacci A. R., Tanzarella O. A., Porceddu E., Varotto S., Ciaffi M. (2007). Molecular and phylogenetic analysis of MADS-box genes of MIKC type and chromosome location of SEP-like genes in wheat (Triticum aestivum L.). Mol Genet Genomics 278:689-708	MIKC-type
MADS-box	AM502882	CAM59060.1	TraesCS6A02G158100.1	33.71	1	173	1	173	7e-24	102	196	0.882653	1	0	Paolacci A. R., Tanzarella O. A., Porceddu E., Varotto S., Ciaffi M. (2007). Molecular and phylogenetic analysis of MADS-box genes of MIKC type and chromosome location of SEP-like genes in wheat (Triticum aestivum L.). Mol Genet Genomics 278:689-708	MIKC-type
MADS-box	AM502883	CAM59061.1	TraesCS6D02G240200.2	49.71	36	210	3	172	3e-34	136	259	0.675676	1	0	Paolacci A. R., Tanzarella O. A., Porceddu E., Varotto S., Ciaffi M. (2007). Molecular and phylogenetic analysis of MADS-box genes of MIKC type and chromosome location of SEP-like genes in wheat (Triticum aestivum L.). Mol Genet Genomics 278:689-708	MIKC-type
MADS-box	AM502884	CAM59062.1	TraesCS5A02G286800.1	51.26	1	223	1	229	2e-52	196	236	0.944915	1	1	Paolacci A. R., Tanzarella O. A., Porceddu E., Varotto S., Ciaffi M. (2007). Molecular and phylogenetic analysis of MADS-box genes of MIKC type and chromosome location of SEP-like genes in wheat (Triticum aestivum L.). Mol Genet Genomics 278:689-708	MIKC-type
MADS-box	AM502885	CAM59063.1	TraesCS5A02G286800.1	52.1	1	223	1	229	5e-52	195	236	0.944915	1	1	Paolacci A. R., Tanzarella O. A., Porceddu E., Varotto S., Ciaffi M. (2007). Molecular and phylogenetic analysis of MADS-box genes of MIKC type and chromosome location of SEP-like genes in wheat (Triticum aestivum L.). Mol Genet Genomics 278:689-708	MIKC-type
MADS-box	AM502886	CAM59064.1	TraesCS5A02G286800.1	55.98	1	218	1	234	1e-56	210	227	0.960352	1	1	Paolacci A. R., Tanzarella O. A., Porceddu E., Varotto S., Ciaffi M. (2007). Molecular and phylogenetic analysis of MADS-box genes of MIKC type and chromosome location of SEP-like genes in wheat (Triticum aestivum L.). Mol Genet Genomics 278:689-708	MIKC-type
MADS-box	AM502887	CAM59065.1	TraesCS6D02G240200.2	45.09	1	173	1	173	2e-33	133	222	0.779279	1	0	Paolacci A. R., Tanzarella O. A., Porceddu E., Varotto S., Ciaffi M. (2007). Molecular and phylogenetic analysis of MADS-box genes of MIKC type and chromosome location of SEP-like genes in wheat (Triticum aestivum L.). Mol Genet Genomics 278:689-708	MIKC-type
MADS-box	AM502888	CAM59066.1	TraesCS6D02G240200.2	45.09	1	173	1	173	5e-33	132	222	0.779279	1	0	Paolacci A. R., Tanzarella O. A., Porceddu E., Varotto S., Ciaffi M. (2007). Molecular and phylogenetic analysis of MADS-box genes of MIKC type and chromosome location of SEP-like genes in wheat (Triticum aestivum L.). Mol Genet Genomics 278:689-708	MIKC-type
MADS-box	AM502889	CAM59067.1	TraesCS6A02G259000.3	43.53	1	170	1	170	3e-30	123	228	0.745614	1	0	Paolacci A. R., Tanzarella O. A., Porceddu E., Varotto S., Ciaffi M. (2007). Molecular and phylogenetic analysis of MADS-box genes of MIKC type and chromosome location of SEP-like genes in wheat (Triticum aestivum L.). Mol Genet Genomics 278:689-708	MIKC-type
MADS-box	AM502890	CAM59068.1	TraesCS6A02G259000.3	43.53	1	170	1	170	5e-30	122	228	0.745614	1	0	Paolacci A. R., Tanzarella O. A., Porceddu E., Varotto S., Ciaffi M. (2007). Molecular and phylogenetic analysis of MADS-box genes of MIKC type and chromosome location of SEP-like genes in wheat (Triticum aestivum L.). Mol Genet Genomics 278:689-708	MIKC-type
MADS-box	AM502891	CAM59069.1	TraesCS6A02G259000.3	40.35	1	171	1	170	9e-27	111	226	0.756637	1	0	Paolacci A. R., Tanzarella O. A., Porceddu E., Varotto S., Ciaffi M. (2007). Molecular and phylogenetic analysis of MADS-box genes of MIKC type and chromosome location of SEP-like genes in wheat (Triticum aestivum L.). Mol Genet Genomics 278:689-708	MIKC-type
MADS-box	AM502892	CAM59070.1	TraesCS6A02G259000.3	40.35	1	171	1	170	9e-27	111	226	0.756637	1	0	Paolacci A. R., Tanzarella O. A., Porceddu E., Varotto S., Ciaffi M. (2007). Molecular and phylogenetic analysis of MADS-box genes of MIKC type and chromosome location of SEP-like genes in wheat (Triticum aestivum L.). Mol Genet Genomics 278:689-708	MIKC-type
MADS-box	AM502893	CAM59071.1	TraesCS6B02G186700.1	98.41	1	252	1	252	7e-135	471	252	1	1	0	Paolacci A. R., Tanzarella O. A., Porceddu E., Varotto S., Ciaffi M. (2007). Molecular and phylogenetic analysis of MADS-box genes of MIKC type and chromosome location of SEP-like genes in wheat (Triticum aestivum L.). Mol Genet Genomics 278:689-708	MIKC-type
MADS-box	AM502894	CAM59072.1	TraesCS1A02G262700.1	92.4	1	248	25	274	2e-106	376	255	0.972549	1	1	Paolacci A. R., Tanzarella O. A., Porceddu E., Varotto S., Ciaffi M. (2007). Molecular and phylogenetic analysis of MADS-box genes of MIKC type and chromosome location of SEP-like genes in wheat (Triticum aestivum L.). Mol Genet Genomics 278:689-708	MIKC-type
MADS-box	AM502895	CAM59073.1	TraesCS1A02G262700.1	99.2	1	251	25	275	6e-110	388	251	1	1	1	Paolacci A. R., Tanzarella O. A., Porceddu E., Varotto S., Ciaffi M. (2007). Molecular and phylogenetic analysis of MADS-box genes of MIKC type and chromosome location of SEP-like genes in wheat (Triticum aestivum L.). Mol Genet Genomics 278:689-708	MIKC-type
MADS-box	AM502896	CAM59074.1	TraesCS6D02G240200.2	32.3	5	221	3	228	1e-25	108	226	0.960177	1	0	Paolacci A. R., Tanzarella O. A., Porceddu E., Varotto S., Ciaffi M. (2007). Molecular and phylogenetic analysis of MADS-box genes of MIKC type and chromosome location of SEP-like genes in wheat (Triticum aestivum L.). Mol Genet Genomics 278:689-708	MIKC-type
MADS-box	AM502897	CAM59075.1	TraesCS6D02G240200.2	32.74	5	221	3	228	2e-26	110	226	0.960177	1	0	Paolacci A. R., Tanzarella O. A., Porceddu E., Varotto S., Ciaffi M. (2007). Molecular and phylogenetic analysis of MADS-box genes of MIKC type and chromosome location of SEP-like genes in wheat (Triticum aestivum L.). Mol Genet Genomics 278:689-708	MIKC-type
MADS-box	AM502898	CAM59076.1	TraesCS3B02G157500.1	93.84	1	273	1	276	2e-116	409	273	1	0	0	Paolacci A. R., Tanzarella O. A., Porceddu E., Varotto S., Ciaffi M. (2007). Molecular and phylogenetic analysis of MADS-box genes of MIKC type and chromosome location of SEP-like genes in wheat (Triticum aestivum L.). Mol Genet Genomics 278:689-708	MIKC-type
MADS-box	AM502899	CAM59077.1	TraesCS3B02G157500.1	99.64	1	276	1	276	6e-123	431	276	1	0	0	Paolacci A. R., Tanzarella O. A., Porceddu E., Varotto S., Ciaffi M. (2007). Molecular and phylogenetic analysis of MADS-box genes of MIKC type and chromosome location of SEP-like genes in wheat (Triticum aestivum L.). Mol Genet Genomics 278:689-708	MIKC-type
MADS-box	AM502900	CAM59078.1	TraesCS1A02G262700.1	47.4	1	170	25	196	7e-37	145	240	0.708333	1	1	Paolacci A. R., Tanzarella O. A., Porceddu E., Varotto S., Ciaffi M. (2007). Molecular and phylogenetic analysis of MADS-box genes of MIKC type and chromosome location of SEP-like genes in wheat (Triticum aestivum L.). Mol Genet Genomics 278:689-708	MIKC-type
MADS-box	AM502901	CAM59079.1	TraesCS6A02G259000.3	47.13	1	171	1	170	3e-33	133	232	0.737069	1	0	Paolacci A. R., Tanzarella O. A., Porceddu E., Varotto S., Ciaffi M. (2007). Molecular and phylogenetic analysis of MADS-box genes of MIKC type and chromosome location of SEP-like genes in wheat (Triticum aestivum L.). Mol Genet Genomics 278:689-708	MIKC-type
MADS-box	AM502902	CAM59080.1	TraesCS6A02G259000.1	47.13	1	171	1	170	6e-33	132	232	0.737069	0	0	Paolacci A. R., Tanzarella O. A., Porceddu E., Varotto S., Ciaffi M. (2007). Molecular and phylogenetic analysis of MADS-box genes of MIKC type and chromosome location of SEP-like genes in wheat (Triticum aestivum L.). Mol Genet Genomics 278:689-708	MIKC-type
MADS-box	AM502903	CAM59081.1	TraesCS3B02G157500.2	42.27	1	193	38	229	1e-33	134	230	0.83913	1	1	Paolacci A. R., Tanzarella O. A., Porceddu E., Varotto S., Ciaffi M. (2007). Molecular and phylogenetic analysis of MADS-box genes of MIKC type and chromosome location of SEP-like genes in wheat (Triticum aestivum L.). Mol Genet Genomics 278:689-708	MIKC-type
MADS-box	AM502904	CAM59082.1	TraesCS3B02G157500.2	44.81	1	179	38	220	1e-35	141	241	0.742739	1	1	Paolacci A. R., Tanzarella O. A., Porceddu E., Varotto S., Ciaffi M. (2007). Molecular and phylogenetic analysis of MADS-box genes of MIKC type and chromosome location of SEP-like genes in wheat (Triticum aestivum L.). Mol Genet Genomics 278:689-708	MIKC-type
MADS-box	AM502905	CAM59083.1	TraesCS3B02G157500.2	45.9	1	179	38	220	3e-37	146	241	0.742739	1	1	Paolacci A. R., Tanzarella O. A., Porceddu E., Varotto S., Ciaffi M. (2007). Molecular and phylogenetic analysis of MADS-box genes of MIKC type and chromosome location of SEP-like genes in wheat (Triticum aestivum L.). Mol Genet Genomics 278:689-708	MIKC-type
MADS-box	GQ496625.1	ACY71501.1	TraesCS6A02G259000.1	61.08	1	189	50	251	7e-56	207	196	0.964286	0	0	Reinheimer R., Kellogg E. A. (2009). Evolution of AGL6-like MADS Box genes in Grasses (Poaceae): ovule expression is ancient and palea expression is new. Plant Cell 21
MADS-box	GQ496626.1	ACY71502.1	TraesCS6D02G240200.2	67.46	1	191	50	258	1e-64	236	191	1	1	0	Reinheimer R., Kellogg E. A. (2009). Evolution of AGL6-like MADS Box genes in Grasses (Poaceae): ovule expression is ancient and palea expression is new. Plant Cell 21
MADS-box	GQ496627.1	ACY71503.1	TraesCS6D02G240200.2	63.81	1	194	50	259	8e-63	231	194	1	1	0	Reinheimer R., Kellogg E. A. (2009). Evolution of AGL6-like MADS Box genes in Grasses (Poaceae): ovule expression is ancient and palea expression is new. Plant Cell 21
MADS-box	GQ496628.1	ACY71504.1	TraesCS6D02G240200.2	61.02	2	163	85	259	4e-47	178	163	0.993865	1	0	Reinheimer R., Kellogg E. A. (2009). Evolution of AGL6-like MADS Box genes in Grasses (Poaceae): ovule expression is ancient and palea expression is new. Plant Cell 21
MADS-box	GQ496629.1	ACY71505.1	TraesCS6D02G240200.2	61.58	2	164	85	259	5e-48	181	164	0.993902	1	0	Reinheimer R., Kellogg E. A. (2009). Evolution of AGL6-like MADS Box genes in Grasses (Poaceae): ovule expression is ancient and palea expression is new. Plant Cell 21
MADS-box	GQ496630.1	ACY71506.1	TraesCS6D02G240200.2	61.02	1	163	85	259	3e-47	179	163	1	1	0	Reinheimer R., Kellogg E. A. (2009). Evolution of AGL6-like MADS Box genes in Grasses (Poaceae): ovule expression is ancient and palea expression is new. Plant Cell 21
MADS-box	GQ496631.1	ACY71507.1	TraesCS6D02G240200.2	69.31	1	188	57	258	4e-67	245	188	1	1	0	Reinheimer R., Kellogg E. A. (2009). Evolution of AGL6-like MADS Box genes in Grasses (Poaceae): ovule expression is ancient and palea expression is new. Plant Cell 21
MADS-box	GQ496632.1	ACY71508.1	TraesCS6D02G240200.2	77.38	1	158	55	222	6e-63	231	160	0.9875	1	0	Reinheimer R., Kellogg E. A. (2009). Evolution of AGL6-like MADS Box genes in Grasses (Poaceae): ovule expression is ancient and palea expression is new. Plant Cell 21
MADS-box	GQ496633.1	ACY71509.1	TraesCS6D02G240200.2	70.83	1	152	55	222	2e-55	206	154	0.987013	1	0	Reinheimer R., Kellogg E. A. (2009). Evolution of AGL6-like MADS Box genes in Grasses (Poaceae): ovule expression is ancient and palea expression is new. Plant Cell 21
MADS-box	GQ496634.1	ACY71510.1	TraesCS6A02G259000.1	78.19	1	178	73	258	8e-69	250	178	1	0	0	Reinheimer R., Kellogg E. A. (2009). Evolution of AGL6-like MADS Box genes in Grasses (Poaceae): ovule expression is ancient and palea expression is new. Plant Cell 21
MADS-box	GQ496635.1	ACY71511.1	TraesCS6D02G240200.2	78.31	1	179	72	259	5e-70	254	179	1	1	0	Reinheimer R., Kellogg E. A. (2009). Evolution of AGL6-like MADS Box genes in Grasses (Poaceae): ovule expression is ancient and palea expression is new. Plant Cell 21
MADS-box	GQ496636.1	ACY71512.1	TraesCS6D02G240200.2	77.96	1	176	75	259	3e-67	245	176	1	1	0	Reinheimer R., Kellogg E. A. (2009). Evolution of AGL6-like MADS Box genes in Grasses (Poaceae): ovule expression is ancient and palea expression is new. Plant Cell 21
MADS-box	GQ496637.1	ACY71513.1	TraesCS6D02G240200.2	80.29	1	198	53	259	2e-80	289	198	1	1	0	Reinheimer R., Kellogg E. A. (2009). Evolution of AGL6-like MADS Box genes in Grasses (Poaceae): ovule expression is ancient and palea expression is new. Plant Cell 21
MADS-box	GQ496638.1	ACY71514.1	TraesCS6A02G259000.3	78.82	1	159	53	222	2e-62	229	161	0.987578	1	0	Reinheimer R., Kellogg E. A. (2009). Evolution of AGL6-like MADS Box genes in Grasses (Poaceae): ovule expression is ancient and palea expression is new. Plant Cell 21
MADS-box	GQ496639.1	ACY71515.1	TraesCS6A02G259000.3	83.53	1	162	53	222	7e-69	251	164	0.987805	1	0	Reinheimer R., Kellogg E. A. (2009). Evolution of AGL6-like MADS Box genes in Grasses (Poaceae): ovule expression is ancient and palea expression is new. Plant Cell 21
MADS-box	GQ496640.1	ACY71516.1	TraesCS6A02G259000.3	91.24	1	137	88	222	3e-55	204	139	0.985612	1	0	Reinheimer R., Kellogg E. A. (2009). Evolution of AGL6-like MADS Box genes in Grasses (Poaceae): ovule expression is ancient and palea expression is new. Plant Cell 21
MADS-box	GQ496641.1	ACY71517.1	TraesCS6D02G240200.2	88.63	1	209	53	259	7e-91	324	209	1	1	0	Reinheimer R., Kellogg E. A. (2009). Evolution of AGL6-like MADS Box genes in Grasses (Poaceae): ovule expression is ancient and palea expression is new. Plant Cell 21
MADS-box	GQ496642.1	ACY71518.1	TraesCS6D02G240200.2	96.26	1	214	50	259	2e-102	363	214	1	1	0	Reinheimer R., Kellogg E. A. (2009). Evolution of AGL6-like MADS Box genes in Grasses (Poaceae): ovule expression is ancient and palea expression is new. Plant Cell 21
MADS-box	GQ496643.1	ACY71519.1	TraesCS6A02G259000.3	97.78	1	135	88	222	4e-61	224	137	0.985401	1	0	Reinheimer R., Kellogg E. A. (2009). Evolution of AGL6-like MADS Box genes in Grasses (Poaceae): ovule expression is ancient and palea expression is new. Plant Cell 21
MADS-box	GQ496644.1	ACY71520.1	TraesCS6A02G259000.1	91.05	1	190	73	258	5e-85	305	190	1	0	0	Reinheimer R., Kellogg E. A. (2009). Evolution of AGL6-like MADS Box genes in Grasses (Poaceae): ovule expression is ancient and palea expression is new. Plant Cell 21
MADS-box	GQ496645.1	ACY71521.1	TraesCS6A02G259000.3	89.39	1	132	94	222	5e-53	197	134	0.985075	1	0	Reinheimer R., Kellogg E. A. (2009). Evolution of AGL6-like MADS Box genes in Grasses (Poaceae): ovule expression is ancient and palea expression is new. Plant Cell 21
MADS-box	GQ496646.1	ACY71522.1	TraesCS6D02G240200.2	92.75	1	205	53	259	5e-98	348	205	1	1	0	Reinheimer R., Kellogg E. A. (2009). Evolution of AGL6-like MADS Box genes in Grasses (Poaceae): ovule expression is ancient and palea expression is new. Plant Cell 21
MADS-box	GQ496647.1	ACY71523.1	TraesCS6D02G240200.2	76.84	1	181	73	259	3e-71	258	181	1	1	0	Reinheimer R., Kellogg E. A. (2009). Evolution of AGL6-like MADS Box genes in Grasses (Poaceae): ovule expression is ancient and palea expression is new. Plant Cell 21
MADS-box	GQ496648.1	ACY71524.1	TraesCS6A02G259000.1	76.44	1	186	72	259	9e-72	260	186	1	0	0	Reinheimer R., Kellogg E. A. (2009). Evolution of AGL6-like MADS Box genes in Grasses (Poaceae): ovule expression is ancient and palea expression is new. Plant Cell 21
MADS-box	GQ496649.1	ACY71525.1	TraesCS6A02G259000.3	78.43	1	151	72	222	7e-55	204	153	0.986928	1	0	Reinheimer R., Kellogg E. A. (2009). Evolution of AGL6-like MADS Box genes in Grasses (Poaceae): ovule expression is ancient and palea expression is new. Plant Cell 21
MADS-box	GQ496650.1	ACY71526.1	TraesCS6A02G259000.3	78.43	1	151	72	222	4e-55	204	153	0.986928	1	0	Reinheimer R., Kellogg E. A. (2009). Evolution of AGL6-like MADS Box genes in Grasses (Poaceae): ovule expression is ancient and palea expression is new. Plant Cell 21
MADS-box	GQ496651.1	ACY71527.1	TraesCS6D02G240200.2	75.54	3	178	80	259	2e-66	243	178	0.988764	1	0	Reinheimer R., Kellogg E. A. (2009). Evolution of AGL6-like MADS Box genes in Grasses (Poaceae): ovule expression is ancient and palea expression is new. Plant Cell 21
MADS-box	GQ496652.1	ACY71528.1	TraesCS6D02G240200.2	75.36	1	203	53	259	1e-79	287	203	1	1	0	Reinheimer R., Kellogg E. A. (2009). Evolution of AGL6-like MADS Box genes in Grasses (Poaceae): ovule expression is ancient and palea expression is new. Plant Cell 21
MADS-box	GQ496653.1	ACY71529.1	TraesCS6D02G240200.2	77.83	1	203	53	259	7e-82	294	203	1	1	0	Reinheimer R., Kellogg E. A. (2009). Evolution of AGL6-like MADS Box genes in Grasses (Poaceae): ovule expression is ancient and palea expression is new. Plant Cell 21
MADS-box	GQ496654.1	ACY71530.1	TraesCS6D02G240200.2	69.57	1	177	55	259	4e-70	255	177	1	1	0	Reinheimer R., Kellogg E. A. (2009). Evolution of AGL6-like MADS Box genes in Grasses (Poaceae): ovule expression is ancient and palea expression is new. Plant Cell 21
MADS-box	GQ496655.1	ACY71531.1	TraesCS6D02G240200.2	64.37	1	143	88	259	4e-51	191	143	1	1	0	Reinheimer R., Kellogg E. A. (2009). Evolution of AGL6-like MADS Box genes in Grasses (Poaceae): ovule expression is ancient and palea expression is new. Plant Cell 21
MADS-box	GQ496656.1	ACY71532.1	TraesCS6D02G240200.2	66.84	1	156	76	259	3e-55	205	156	1	1	0	Reinheimer R., Kellogg E. A. (2009). Evolution of AGL6-like MADS Box genes in Grasses (Poaceae): ovule expression is ancient and palea expression is new. Plant Cell 21
MADS-box	GQ496657.1	ACY71533.1	TraesCS6D02G240200.2	77.88	1	200	55	259	2e-82	296	200	1	1	0	Reinheimer R., Kellogg E. A. (2009). Evolution of AGL6-like MADS Box genes in Grasses (Poaceae): ovule expression is ancient and palea expression is new. Plant Cell 21
MADS-box	GQ496658.1	ACY71534.1	TraesCS6D02G240200.2	77.51	1	201	53	259	2e-83	300	201	1	1	0	Reinheimer R., Kellogg E. A. (2009). Evolution of AGL6-like MADS Box genes in Grasses (Poaceae): ovule expression is ancient and palea expression is new. Plant Cell 21
MADS-box	GQ496659.1	ACY71535.1	TraesCS6D02G240200.2	77.45	1	196	58	259	2e-81	293	196	1	1	0	Reinheimer R., Kellogg E. A. (2009). Evolution of AGL6-like MADS Box genes in Grasses (Poaceae): ovule expression is ancient and palea expression is new. Plant Cell 21
MADS-box	AB107991	BAD12461.1	TraesCS6B02G186700.1	35.42	1	206	1	238	3e-30	122	208	0.990385	1	0	Hama, E.; Takumi, S.; Ogihara, Y.; Murai, K. Pistillody is caused by alterations to the class-B MADS-box gene expression pattern in alloplasmic wheats. Planta 2004, 218, 712–720.		WPI1
MADS-box	AB107992	BAD12462.1	TraesCS6A02G158100.1	34.73	1	207	1	238	2e-32	130	209	0.990431	1	0	Hama, E.; Takumi, S.; Ogihara, Y.; Murai, K. Pistillody is caused by alterations to the class-B MADS-box gene expression pattern in alloplasmic wheats. Planta 2004, 218, 712–720.		WPI2
MADS-box	TraesCS6A02G259000.1	TraesCS6A02G259000.1	TraesCS6A02G259000.1	100	1	259	1	259	1e-136	477	259	1	0	0	Yali Su, Jinxing Liu, Wanqi Liang, et al.: Wheat AGAMOUS LIKE 6 transcription factors function in stamen development by regulating the expression of Ta APETALA3.Development, 2019,doi: 10.1242/dev.177527		TaAGL6-A
MADS-box	TraesCS6B02G286400.1	TraesCS6B02G286400.1	TraesCS6B02G286400.2	100	1	226	1	226	4e-120	422	259	0.872587	1	0	Yali Su, Jinxing Liu, Wanqi Liang, et al.: Wheat AGAMOUS LIKE 6 transcription factors function in stamen development by regulating the expression of Ta APETALA3.Development, 2019,doi: 10.1242/dev.177527		TaAGL6-B
MADS-box	TraesCS6D02G240200.1	TraesCS6D02G240200.1	TraesCS6D02G240200.2	100	1	227	1	227	1e-117	414	260	0.873077	1	0	Yali Su, Jinxing Liu, Wanqi Liang, et al.: Wheat AGAMOUS LIKE 6 transcription factors function in stamen development by regulating the expression of Ta APETALA3.Development, 2019,doi: 10.1242/dev.177527		TaAGL6-D
MADS-box	AB007504	BAA33457.1	TraesCS5A02G286800.1	55.98	1	182	1	184	2e-47	180	244	0.745902	1	1	Koji Murai, Shigeo Takumi, Hironori Koga and Yasunari Ogihara：Pistillody, homeotic transformation of stamens into pistil-like structures, caused by nuclear±cytoplasm interaction in wheat. The Plant Journal (2002) 29(2), 169±181		WAP1
MADS-box	AB007506	BAA33459.1	TraesCS6B02G186700.1	40.91	1	153	1	154	3e-32	130	230	0.665217	1	0	Koji Murai, Shigeo Takumi, Hironori Koga and Yasunari Ogihara：Pistillody, homeotic transformation of stamens into pistil-like structures, caused by nuclear±cytoplasm interaction in wheat. The Plant Journal (2002) 29(2), 169±181		WAP3
MADS-box	AB084577	BAC22939.1	TraesCS1A02G125800.1	98.43	1	254	16	269	3e-114	402	254	1	1	1	Akira Meguro, Shigeo Takumi, Yasunari Ogihara, Koji Murai: WAG, a wheat AGAMOUS homolog, is associated with development of pistil-like stamens in alloplasmic wheats. Sex Plant Reprod (2003) 15:221–230		WAG
MYB	KY475611	ATY37763.1	TraesCS2B02G343800.1	70.68	1	133	1	133	9e-54	201	264	0.503788	1	0	Yue Zhao, Xuejun Tian, Fei Wang, Liyuan Zhang, Mingming Xin, Zhaorong Hu, Yingyin Yao, Zhongfu Ni, Qixin Sun and Huiru Peng: Characterization of wheat MYB genes responsive to high temperatures.BMC Plant Biology, 2017, 17:208		TaMYB83
MYB	MH428952.1	AYK27535.1	TraesCS5A02G227400.1	98.43	1	317	1	318	1e-133	467	318	0.996855	0	0	Yue Zhao, Xiyong Cheng, Xiaodan Liu, Huifang Wu, Huihui Bi and Haixia Xu: The Wheat MYB Transcription Factor TaMYB31 Is Involved in Drought Stress Responses in Arabidopsis.Front. Plant Sci.2018,9:1426		TaMYB31-B
YABBY		TaDL1	TraesCS4A02G058800.1	99	1	200	1	200	1e-96	343	200	1	1	1	Li Zhang, Zaijun Yang, Zhengsong Peng, Yan Yu1 & Qingxu Sun: Molecular Cloning, Characterization, and Expression Analysis of DROOPING LEAF gene in the Pistillody Line of Common Wheat.Modern Applied Science; 9: 44-52; 2015
YABBY		TaDL2	TraesCS4A02G058800.3	99.01	1	202	1	202	5e-98	348	202	1	0	0	Li Zhang, Zaijun Yang, Zhengsong Peng, Yan Yu1 & Qingxu Sun: Molecular Cloning, Characterization, and Expression Analysis of DROOPING LEAF gene in the Pistillody Line of Common Wheat.Modern Applied Science; 9: 44-52; 2015
YABBY		TaDL3	TraesCS4A02G058800.1	99.5	1	199	1	199	1e-96	343	200	0.995	1	1	Li Zhang, Zaijun Yang, Zhengsong Peng, Yan Yu1 & Qingxu Sun: Molecular Cloning, Characterization, and Expression Analysis of DROOPING LEAF gene in the Pistillody Line of Common Wheat.Modern Applied Science; 9: 44-52; 2015
YABBY	AB470269.1	BAH83538.1	TraesCS4A02G058800.1	100	1	200	1	200	5e-97	344	201	0.995025	1	1	Motokazu Ishikawa, Yoshihiro Ohmori, Wakana Tanaka, Chizuru Hirabayashi, Koji Murai, Yasunari Ogihara, TAKAIRO Yamaguchi, and Hiro-Yuki Hirano: The spatial expression pattern of DROOPING LEAF orthologs suggest a conserved function in grasses. Genes Genet.Syst. 2009,84: 137-146.
